# Supplementary material for: Spatiotemporal Variability in the Oxidative Potential of Ambient Fine Particulate Matter in Midwestern United States
Source: Copernicus journal article supplement (doi:10.5194/acp-2021-376), 2021-06-02
Supplement: Supplementary file [file acp-2021-376-AC1-supplement.pdf]

Dr. Timothy Bertram  
Editor  
Atmospheric Chemistry and Physics

Dear Dr. Timothy Bertram,

Along with this letter, we have submitted our response document for the manuscript “Spatiotemporal Variability in the Oxidative Potential of Ambient Fine Particulate Matter in Midwestern United States”. We had received the reviews from two referees and one community comment. All the comments have been satisfactorily addressed based on a point-by-point response in the attached document. To facilitate the review process, we have also included the marked-up version of our revised manuscript (track-changes mode), so that the reviewers can see how the comments are incorporated in the manuscript. The manuscript has been substantially improved as a result of this review and we really appreciate all the valuable suggestions provided by the reviewers.

We believe that our revised manuscript meets the high-quality standards of ACP, and we look forward to any further comments the reviewers and editor might have.

Sincerely,

Haoran Yu

Graduate Student  
Department of Civil and Environmental Engineering  
University of Illinois at Urbana-Champaign  
205 N Mathews Ave, Urbana, IL 61801  
352-213-5899

## Reviewer: Anonymous Reviewer #2

Yu et al report on extensive measurements of PM2.5 OP (oxidative potential) based on an analysis involving 5 different acellular approaches. The analysis was performed on samples collected at a number of sites in the midwestern US and the paper reports on comparisons between the assays and PM2.5 mass. It is stated that a second paper will focus on the PM2.5 chemical components driving these results. The paper is based on a substantial amount of work and provides more insights into the utility of current ways to characterize OP, and it also sheds light on the potential usefulness of using these assays in health studies.

A major conclusion is that the poor correlation between all the various assays, when compared at one site, (and this is largely true for all the sites), implies all these types of OP assays are needed for health studies. One could also conclude, that all of these assays (except possibly one) are each deficient, and no ideal assay exists. It may also even suggest that if no comprehensive OP assay is available, then maybe the approach is flawed since the goal of using these assays was to develop a comprehensive single measure of aerosol toxicity. Since this group of assays appears to fail in demonstrating this goal, instead maybe one should focus on the specific species that drive OP and not use these assays? How does one know if even more assays are needed to fully characterize PM2.5 OP? Furthermore, how would all these various OP measurements, even if available to health researchers, be utilized in a health study, ie how would they be combined to give an overall better indicator of PM2.5 OP? These questions are important and should likely be considered; a discussion beyond the conclusion that all these assays should be utilized, is warranted.

*Response:*

*We thank the reviewer for the inspiring comments. These comments have really helped us in enhancing the discussion of our paper. The reviewer raised several questions regarding the rationality of using oxidative potential (OP) as a health indicator and measuring OP with multiple endpoints. We have attempted to address them point-by-point in the following discussion.*

“One could also conclude, that all of these assays (except possibly one) are each deficient, and no ideal assay exists.”

*Yes, we agree with the reviewer’s comment that one aspect of the conclusion of our study could be that all of these assays are each deficient, and no ideal assay exists. However, to be more accurate, we cannot comment on the deficiency or benefit of an assay based on this study. This will require an integration of these assays with either toxicological or epidemiological study. Nevertheless, following the reviewer’s suggestion we have added a few sentences in the results and discussion section of our manuscript in lines 576 – 585, “Overall, a poor-to-moderate and inconstant intercorrelation trend among different endpoints of both water-soluble and methanol-soluble OP at most sites indicates that all these assays could be deficient from being ideal and measuring a single endpoint is not enough to represent the overall OP activity. ... However, it should be noted that our study is not designed to assess and rank the biological relevance of these acellular endpoints, which will require an integration of these and possibly other novel assays involving different routes of oxidative stress, in either toxicological or epidemiological studies.” We also*

*included it in our conclusion in lines 613 - 615, “Since our study cannot comment on the biological relevance of these different pathways, we recommend integrating all these and other assays in toxicological or epidemiological studies, to assess their relative utilities.”*

*“It may also even suggest that if no comprehensive OP assay is available, then maybe the approach is flawed since the goal of using these assays was to develop a comprehensive single measure of aerosol toxicity.”*

*We do not agree with the reviewer’s point here. First, we do not think that the goal of these assays was to develop a comprehensive single measure of aerosol toxicity. The current national ambient air quality standards are based on PM mass alone, despite we clearly know that certain components of the PM are more toxic than others. One goal of developing these assays was to have an alternative metric which is able to capture some of the potential toxic mechanisms of these components. Although it could appear from the OP literature that the goal is to develop a single measurement of OP for representing multiple pathways of aerosol toxicity, numerous studies have repeatedly indicated that all these measures have their limitations in terms of incorporating the roles of different redox-active components. For example, Xiong et al. (2017) reported negligible  $OP^{DTT}$  activity of Fe ions (i.e.  $Fe^{2+}$  and  $Fe^{3+}$ ) and strong synergistic effect of Fe and quinones in  $OP^{OH-DTT}$ , indicating the limitation of  $OP^{DTT}$  in counting the contribution of Fe. Ayres et al. (2008) reported different responses of  $Fe^{3+}$ ,  $Cu^{2+}$  and  $Zn^{2+}$  towards  $OP^{AA}$  and  $OP^{GSH}$  in a respiratory tract lining fluid (RTLFL). Moreover, many studies have found different correlation trends of different endpoints with chemical components and sources of PM, e.g.  $OP^{AA}$  vs.  $OP^{DTT}$  (Fang et al., 2016; Perrone et al., 2019; Visentin et al., 2016; Janssen et al., 2014),  $OP^{ESR}$  (i.e. oxidative potential measured with electron spin resonance assay) vs.  $OP^{AA}$ ,  $OP^{GSH}$  and  $OP^{DTT}$  (Calas et al., 2018). Janssen et al. (2015), Weichenthal et al. (2016a), Weichenthal et al. (2016b) and Maikawa et al. (2016) also reported different associations of different acellular OP endpoints (e.g.  $OP^{AA}$ ,  $OP^{GSH}$ ,  $OP^{DTT}$  and  $OP^{ESR}$ ) with the health endpoints, including markers of airway and nasal inflammation, risk of emergency room visits for respiratory diseases, myocardial infarction, and fractional exhaled nitric oxide (FeNO), respectively. However, despite these differences and limitations, we do not think that it is appropriate to say that the approach is flawed, simply because in almost all of the health studies, these assays have shown a better association than the PM mass (Bates et al., 2015; He et al., 2021; Maikawa et al., 2016; Strak et al., 2017; Weichenthal et al., 2016a). Thus, we know that despite their limitations they are superior to the currently used PM metric based solely on the mass. These evidences show the complexity of OP-associated pathways, and make it somewhat unrealistic to develop a single comprehensive assay, at least with the current state of the art.*

*Given the current scenario, it sounds reasonable to combine these assays, i.e. apply all of these assays on each PM sample, for assessing the OP comprehensively. Although each assay has its deficiency, it can represent a specific pathway of OP which probably overcomes the deficiency of another assay lacking that particular pathway. For example,  $OP^{OH-DTT}$  developed in our previous studies (Xiong et al., 2017; Yu et al., 2018) can supplement the pathway represented by  $OP^{DTT}$  for generating superoxide radical ( $\cdot O_2^-$ ), with its subsequent reaction with metal ions for generating the hydroxyl radical ( $\cdot OH$ ).  $OP^{AA}$  and  $OP^{GSH}$  directly measure the consumption of these antioxidants (i.e. AA and GSH) in a surrogate lung fluid (SLF), representing the antioxidant consumption pathways, while measuring  $\cdot OH$  generation in SLF ( $OP^{OH-SLF}$ ) simulate subsequent*

*reactive oxygen species (ROS) generation process in human lung lining fluid and thus supplementing the antioxidant consumption process. These five assays combined together cover most of the known and potentially important biological pathways of PM exerting oxidative stress in vivo. Our results showing disparities in the intercorrelation among five endpoints further support the finding that by combining these five assays, we can minimize their deficiencies.*

“Since this group of assays appears to fail in demonstrating this goal, instead maybe one should focus on the specific species that drive OP and not use these assays?”

*Measuring the specific species in PM that drive OP is even more complicated in linking the chemical composition with health effects. First, the composition of PM is highly complex containing tens of trace metals (Kundu and Stone, 2014; Kim et al., 2005; Luo et al., 2018; Reff et al., 2009; Tao et al., 2017), innumerable organic species (Lin et al., 2017; Lin et al., 2018; Lin and Yu, 2020; Riva et al., 2016; Chen et al., 2020) and numerous inorganic ions ( $\text{NH}_4^+$ ,  $\text{SO}_4^{2-}$ ,  $\text{NO}_3^-$ , etc.). Note, none of the analytical techniques is capable of measuring all of the organic compounds, therefore bulk parameters such as OC, WSOC and humic-like substances (HULIS) are used to represent such a large group of species present in the ambient PM. Despite such classifications, these bulk organic species coming from different sources show very different OP behavior. For example, Lin and Yu (2020) reported three different types of interactions, i.e. additive, antagonistic, and synergistic of the HULIS extracted from three different sources, i.e. ambient  $\text{PM}_{2.5}$ , rice straw burning and sugar cane leaf burning, respectively, with Cu for oxidizing AA. Second, the health effect of PM might not be accounted by simply adding up the contribution of individual chemical species due to non-linear responses of some species like Cu and Mn towards OP (Charrier and Anastasio, 2012; Charrier et al., 2015) and synergistic/antagonistic interactions among various PM species for exerting the oxidative stress and toxicity (Lin and Yu, 2020; Yu et al., 2018; Charrier and Anastasio, 2015; Wang et al., 2020). All these points essentially demonstrate that the approach of relating the health effects directly with the chemical composition is even more complicated than using rather limited number of the OP assays.*

“How does one know if even more assays are needed to fully characterize  $\text{PM}_{2.5}$  OP?”

*We completely agree with the reviewer on this point. There could be more assays needed to fully characterize the  $\text{PM}_{2.5}$  OP. This is an open question which we do not think can be addressed from our study and neither it was the goal of the current analysis. However, as of now, these are the most commonly used endpoints, all of which we have included in our study. As the knowledge on this topic expands, we expect that future investigations on the novel OP endpoints might extend our scope. Following the reviewer's suggestion, we have included this point in the discussion of our manuscript in lines 578 – 583, “Although, the OP endpoints used in our study have covered some of the well-known and important pathways of the in vivo oxidative stress caused by  $\text{PM}_{2.5}$ , there are other endpoints (e.g. consumption of cysteine, formation of  $\text{H}_2\text{O}_2$ , etc.), and more assays can be developed in the future. We suggest that a collection of diverse range of OP endpoints, measured separately as done in our study could better capture the role of different PM components and their interactions via different pathways for driving the oxidative levels of the PM in a region.”*

“Furthermore, how would all these various OP measurements, even if available to health researchers, be utilized in a health study, ie how would they be combined to give an overall better indicator of PM2.5 OP?”

*First, we would like to highlight that the importance of our study lies in showing that the responses of these assays do not correlate with each other. Which of these assays is better than the other is the second question which is beyond the scope of our current study. To address that question, we need to integrate them in the epidemiological studies. However before that step, an obvious question arises that do all these assays have to be integrated or just few of them (in case they would have been correlated). Our investigation shows that all of them should be integrated to know which one is better than the other, because they are not correlated with each other.*

*Now, by combining, we do not mean to merge them into one assay, rather we mean that we should do all of them individually on each PM sample. Then we should integrate all of this data in an epidemiological study to assess the relevance of each of them. Some previous studies have adopted this approach for investigating the health relevance of OP by associating it with health endpoints (Abrams et al., 2017;Strak et al., 2017;Zhang et al., 2016;Yang et al., 2016;Weichenthal et al., 2016a;He et al., 2021;Janssen et al., 2015). These studies have definitely helped in enhancing our understanding on the relevance of OP measurements and the role of specific endpoint in comparison to PM mass. However, these are very limited with their focus only on 2 or 3 endpoints. Incorporating all the available OP endpoints measured on the same set of samples in epidemiological studies should help to clearly see their roles and rank them as per their relevance, which is what we expect in longer term from this dataset.*

The data do support other studies showing variability between various OP measures and PM2.5 mass, suggesting PM2.5 mass is a poor predictor of the ability of particles to cause oxidative stress (assuming these assays are good measures of OP). This is an important finding.

*Response:*

*We thank the reviewer for appreciating this finding.*

Comparisons between sites using different samplers operating at the same time depends on some level of measurement precision to argue that observed differences (poor correlations) are really due to differences in aerosol particles at the sites. This applies to the gravimetric measurement of PM2.5 mass and the various OP measurements. The authors do discuss variability in the negative and positive controls, but the data shown in Table 1 is only the precision of the analysis and does not consider sampling, filter storage or extraction. Can it be stated that this precision for all the species measured and PM2.5 mass is significantly better (lower variability) than that of the comparisons between sites. It would be especially interesting to know the precision of the methanol extracts, which based on the extraction approach is likely the most imprecise measurement (curiously it also shows the least variability between assay results from various sites). A more comprehensive discussion is warranted that includes specifically addressing if the differences seen are real or just noise.

*Response:*

This is a good point by the reviewer and we apologize not to address it earlier in our original manuscript, despite conducting some experiments to test the variability among various samplers, before the sampling. To further explore it, we have conducted more experiments now after the sampling. The results of all these experiments are presented in the discussion below.

First of all, we would like to note that out of five samplers used in our study, two were old samplers (about 5 years old, used in various sampling campaigns) and three were brand new, which were bought from TISCH Environmental (Cleveland, OH, US) a month before the sampling. These new samplers were factory calibrated and installed at three farther sites, i.e. Chicago (CHI), Indianapolis (IND) and St. Louis (STL). The other two old samplers were installed at Champaign (CMP) and Bondville (BON). For the sole purpose of this discussion, we will name them as CHI (N), IND (N), STL (N), CMP (O) and BON (O). Since the new samplers were factory calibrated, we had more confidence in them, therefore, we chose one of those samplers, i.e. CHI(N), as a reference and compared the responses of other two old samplers, i.e. CMP (O) and BON (O), by running them in pairs, i.e. first CHI (N) and CMP (O) pair, followed by CHI (N) and BON (O) pair, at a site in Urbana in April 2018 (due to some practical constraint, we couldn't run all three of them together). We collected 9 sets of Hi-Vol samples on the quartz filters (24-hours integrated samples) from each pair, and analyzed them for the DTT assay using the same extraction and analysis procedure as used in our current study. The comparison of this analysis is shown in Figure 1 of the response document. As can be seen from these figures, there are excellent correlations ( $R^2 = 0.92 - 0.94$ ) between the old and new samplers, with slopes almost equal to 1.

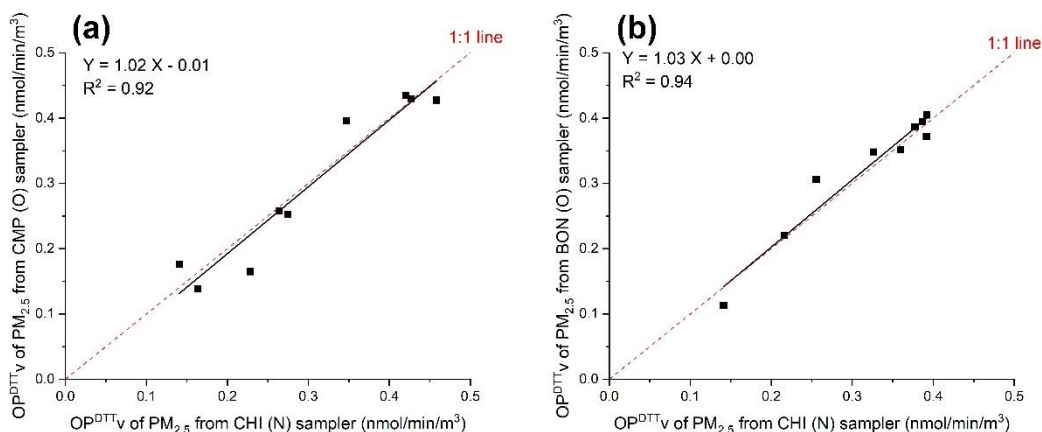

Figure 1. Comparison between  $OP^{DTT}$  of the  $PM_{2.5}$  samples collected from three samplers: CHI (N) vs. CMP (O) (Figure 1a) and CHI (N) vs. BON (O) (Figure 1b)

After this comparison, we moved all the samplers to their respective sites for the campaign. We believe, that the largest cause of uncertainty in these samplers when they were moved to different sites should be from the variability in their flow rates. Therefore, to minimize that, we always measured the flow rates before and after collecting the  $PM_{2.5}$  samples. During the entire sampling campaign, all five samplers were monthly calibrated for the flow rate by using a variable flow calibration kit (Tisch Environmental), which includes a calibration orifice and slack tube water manometer.

We controlled the variability from gravimetric measurements by weighing the filters for at least three times before and after sampling, and ensured that the maximum difference of the mass between three consecutive weighing was less than 0.5 mg. This value is insignificant in comparison to the typical  $PM_{2.5}$  mass loadings on the filters, i.e. 40 – 100 mg. Moreover, we always stored all our samples in the same freezer at  $-20\text{ }^{\circ}\text{C}$  right after weighing. The samples were only taken out from the freezer prior to OP analysis and were immediately placed in the freezer after punching to minimize the loss of semi-volatile species. This should eliminate the effect of storage on the precision.

However, we understand that despite these quality control and checks, we should still inter-compare the three new Hi-Vol samplers installed in Chicago, Indianapolis and St. Louis. Therefore, following the reviewer’s comment, we brought these samplers back to our university last month, put them side-by-side at a site in Urbana (IL) and collected 9 Hi-Vol samples (24-hour integrated) from each sampler. All these samples were extracted and analyzed for the DTT activity in the same manner as used in our current study. The results of these comparisons are shown in Figure 2 of the response document. Again, we found excellent correlations ( $R^2 = 0.93 - 0.95$ ) with slopes close to 1. Note, these comparison results include the variabilities caused by sampling, filters storage and their extraction, as pointed out by the reviewer.

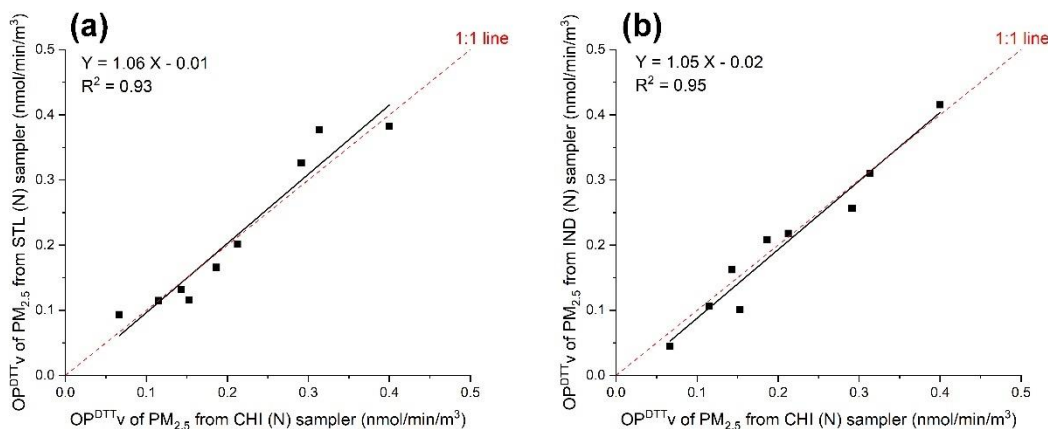

Figure 2. Comparison between  $OP^{DTT}$  of the  $PM_{2.5}$  samples collected from three samplers: CHI (N) vs. STL (N) (Figure 2a) and CHI (N) vs. IND (N) (Figure 2b)

Finally, to address the reviewer’s comment related to methanol extracts, we assessed the precision of methanol-soluble OP for all endpoints, following the same protocol as used for the water-soluble OP measured in our previous study (Yu et al. (2020)). Specifically, ten groups of four punches, each of 0.75” diameter were cut from the same Hi-Vol filter collected at CMP site, and extracted separately into 10 mL methanol. The methanol in the filtered extracts was then evaporated, and each individual residual extract ( $\sim 50\text{ }\mu\text{L}$ ) was reconstituted with DI to reach 12 mL volume. The concentration of the PM in the reaction vial (RV) was maintained at the same level as used in Yu et al. (2020), i.e.  $50\text{ }\mu\text{g}/\text{mL}$  for SLF-based endpoints, and  $30\text{ }\mu\text{g}/\text{mL}$  for DTT-based endpoints. The coefficient of variation (CoV; i.e. the standard deviation of the ten groups of measured OP divided by their average), was used to determine the precision of OP and shown in Table 1 of this response document. Overall, the CoV for methanol-soluble OP of all endpoints (8.9

– 14.5 %) was at the same level as that for the water-soluble OP (7.9 – 13.3 %) reported in Yu et al. (2020), indicating that the precision of methanol-soluble OP was as good as water-soluble OP. We have included all these results in SI (Section S1, Figures S1-S2 and Table S2) of the revised manuscript, and discussed them in lines 141 – 142 of the revised manuscript, “Both before and after the sampling campaign, we did a comparison of various samplers by running them in parallel to collect PM<sub>2.5</sub> samples and analyzing them for OP<sup>DTT</sup> (see Section S1 of the supplemental information, SI). ... All five samplers were monthly calibrated for the flow rate by using a variable flow calibration kit (Tisch Environmental), and the flow rate was measured every week before and after the sampling.”, and lines 228 – 234, “The precision of SAMERA was assessed previously using water-soluble extracts and the coefficient of variations (CoVs) were reported to be less than 14 % (7.9 – 13.3 %) for all OP endpoints (Yu et al., 2020). We also assessed the precision using methanol-soluble extracts and found similar levels of CoVs, i.e. 8.9 -14.5 % for all OP endpoints (see Table S2 in SI). Consistency of our current results for negative controls with those reported earlier, and the low CoVs obtained for the positive controls (1.1 – 11.8%), and PM<sub>2.5</sub> extracts ensured a good quality assurance for the overall OP analysis.”

Table 1. Precision of SAMERA for methanol-soluble OP measurements compared with water-soluble OP measurements.

| Endpoint             | Unit                    | Average | Standard Deviation | CoV (%) | CoV (%) for the water-soluble PM <sub>2.5</sub> extract (Yu et al., 2020) |
|----------------------|-------------------------|---------|--------------------|---------|---------------------------------------------------------------------------|
| OP <sup>AA</sup>     | nmol/min/m <sup>3</sup> | 0.132   | 0.018              | 13.51   | 11.87                                                                     |
| OP <sup>GSH</sup>    | nmol/min/m <sup>3</sup> | 0.098   | 0.010              | 10.65   | 7.89                                                                      |
| OP <sup>OH-SLF</sup> | pmol/min/m <sup>3</sup> | 0.740   | 0.011              | 14.49   | 10.56                                                                     |
| OP <sup>DTT</sup>    | nmol/min/m <sup>3</sup> | 0.187   | 0.017              | 8.89    | 10.52                                                                     |
| OP <sup>OH-DTT</sup> | pmol/min/m <sup>3</sup> | 0.216   | 0.023              | 10.88   | 13.28                                                                     |

One conclusion that may be drawn from this work and which is consistent with past studies is that the DTT assay is the most comprehensive measurement of OP (see, for example, discussion in lines 289-407). This may be because DTT includes electron transfer reactions from both organic species and metals, whereas AA, GSH and production of OH in the various assays is likely largely driven by metals. One could actually discuss an interpretation of the data in which the most assay meets the goal of being the most comprehensive. For example, maybe instead of arguing that all assays in their various forms are needed, one could try to assess which is best?

*Response:*

We agree that OP<sup>DTT</sup> has been widely used in many studies as the OP indicator, and it was associated with both organic species (e.g., HULIS, quinones) and metals (e.g., Cu and Mn) (Charrier and Anastasio, 2012; Yu et al., 2018). However, as we have pointed out earlier, OP<sup>DTT</sup> does not capture the contribution of Fe in ·OH formation (Xiong et al., 2017; Yu et al., 2018). This mechanism of ROS generation is also important as shown in one of our earlier study revealing the synergistic interaction of Fe with quinones and HULIS in enhancing the cytotoxicity (Wang et al., 2020). As observed in many studies, this synergism between Fe and organic species was captured by both OP<sup>OH-SLF</sup> (Wei et al., 2018; Gonzalez et al., 2017) and OP<sup>OH-DTT</sup> (Yu et al., 2018; Xiong et al., 2017). Wang et al. (2018) reported stronger correlations of cytotoxicity of ambient PM<sub>2.5</sub> with



both  $OP^{OH-SLF}$  and  $OP^{OH-DTT}$  ( $r = -0.84$  and  $-0.82$ , respectively) compared to its correlation with  $OP^{DTT}$  ( $r = -0.58$ ), further indicating that both  $\cdot OH$  generating endpoints could have more important roles in the biological pathways leading to cytotoxicity. Similarly, although  $OP^{AA}$  and  $OP^{GSH}$  showed similar sensitivities as  $OP^{DTT}$  towards certain species (i.e. Cu), they represent potentially different biological pathways of oxidative stress.  $OP^{DTT}$  simulates the redox reaction of cellular antioxidants, such as NADPH in mitochondria (Cho et al., 2005; Kumagai et al., 2002), while  $OP^{AA}$  and  $OP^{GSH}$  directly measure the antioxidant consumption in lung lining fluid (Weichenthal et al., 2016b). Previous studies have also noted some associations of health outcomes with  $OP^{AA}$  (Janssen et al., 2015) and  $OP^{GSH}$  (Maikawa et al., 2016; Weichenthal et al., 2016b), respectively.

Considering the deficiencies and biological relevance of each endpoint, we believe it would be premature to rank  $OP^{DTT}$  as the best assay among them. Rather than the comparison among themselves or their correlation with the chemical composition, we think that the choice of the most comprehensive OP endpoints (if there is any such thing) should be determined by their association with the health outcomes.

Specific Comments.

Line 20-21, not sure how higher site to site correlations proves methanol extracts includes more insoluble species? The idea that methanol extracts a greater fraction of OP than water is well known.

*Response:*

Water-extracts are supposed to contain only water-soluble components while methanol being a solvent with polarity between water and strongly non-polar solvents such as hexane, is supposed to extract major fraction of both water-soluble and water-insoluble components. Our rationale for explaining higher site-to-site correlation in methanol extracts is that the components coming from same sources, such as the regional sources (SOA, biomass burning etc.) have a better chance of being extracted in methanol (irrespective of whether they are water-soluble or insoluble) and thus lead to a higher correlation, masking the effect of the components originated from local sources which could have a narrow range of solubilities. We have further clarified it in our sentences on lines 532 – 536, “It is possible that methanol is able to extract more redox-active PM components coming from regional emission sources, e.g. biomass burning or secondary organic aerosols, present at these sites. The components originated from these common sources could mask the effect of other components originated from the local sources having a narrower range of solubilities, thus yielding to an overall lower spatiotemporal variability and better correlation among different sites.”

Lines 142 to 148, Charrier et al (2016) suggest a mass concentration for measurement of OP to limit nonlinear effects of 10ug PM/mL, here the authors use 100 ug/mL, why and what is the effect of doing this, ie does it solve the nonlinear problem?

*Response:*

*We clarify that the concentration of PM<sub>2.5</sub> in the extract we used for measuring OP is 30 µg/mL for OP<sup>DTT</sup> and OP<sup>OH-DTT</sup>, and 50 µg/mL for OP<sup>AA</sup>, OP<sup>GSH</sup> and OP<sup>OH-SLF</sup> (lines 154-156 in the original preprint). The concentration of 100 µg/mL was used in the sample vials kept in our automated system, which were further diluted before using them in the reaction vials. Note, the range recommended by Charrier et al. (2016) was based on the samples collected from California (Claremont and Fresno). OP<sub>m</sub> is a sole function of PM chemical composition and this recommendation of the standard concentration is not applicable to the samples with different chemical composition. Charrier et al. (2016) also noted that there is no “right” concentration for the standard. As quoted from their publication, “We propose a standard of expressing mass-normalized DTT results relative to an extract concentration of 10 mg-PM/mL of DTT solution; while there is no ‘right’ concentration for the standard, this proposed extract concentration provides an adequate DTT response for typical ambient PM in our experience but uses relatively little sample.” For DTT-based endpoints, our preliminary tests indicated that the concentration recommended in Charrier et al. (2016) (10 µg/mL) was very low for some of our samples with low redox activity, while 30 µg/mL of PM<sub>2.5</sub> extract was the safe concentration to produce the levels well above detection levels for OP<sup>DTT</sup> and OP<sup>OH-DTT</sup> activities. Since our samples are collected from Midwest US, there could be a very different mix of aerosol sources for our samples compared to their (Charrier et al., 2016) samples collected in California. Thus, it is reasonable to choose the concentration based on the specific composition of our samples to obtain effective measurements.*

*We adopted the concentration for SLF-endpoints based on many previous studies using OP<sup>AA</sup> and OP<sup>GSH</sup> as the OP indicators (Godri et al., 2011; Godri et al., 2010; Ayres et al., 2008; Künzli et al., 2006; Szigeti et al., 2016). This concentration was sufficient for producing valid OP<sup>OH-SLF</sup> values (i.e. higher than the detection limit of our measurements) for most of our PM<sub>2.5</sub> samples.*

*Moreover, since we are keeping the concentration constant across all samples, the non-linear biases caused by the concentration of Cu and Mn in the OP endpoints are not so relevant for the comparison of OP responses of our samples collected from different sites.*

It would be useful to provide the composition of the simulated lung fluid.

*Response:*

*The surrogate lung fluid (SLF) used in our study consists of four antioxidants. The final concentrations of these antioxidants in the reaction vial used for incubating with the PM extract were 200 µM L-ascorbic acid (AA), 100 µM reduced glutathione (GSH), 300 µM citric acid (CA) and 100 µM uric acid (UA). We have included the procedures for making SLF and the final concentrations of these antioxidants in the manuscript in lines 187 – 190 , “SLF was made following the protocol of Yu et al. (2020), i.e. by mixing equal volumes (1 mL each) of four antioxidant stock solutions – 20 mM AA, 10 mM GSH, 30 mM citric acid (CA) and 10 mM UA, and diluting the mixture by DI to 10 mL. Final concentrations of the antioxidants in the RV used for incubating the sample, were 200 µM AA, 100 µM GSH, 300 µM CA and 100 µM UA. ”*

One issue with current measurements of OP by the various methods is that there is a range of approaches used for each of the methods. This makes comparisons between this work and other

studies complicated. It would be valuable to know exactly how these various methods compare to what has been utilized in other studies. For example, maybe a table in the supplement could provide more details on the methods used here links to past studies that used the exact same approach.

*Response:*

*In Table S2 of our submitted preprint, we have included the studies using the same OP endpoints, and briefly described the differences of their methods in the notes. We thank the reviewer for this suggestion, based on which we have further expanded this table by including more details of the methodology of the studies we cited in the revised Table S6 (corresponding to Table S2 of the preprint).*

Line 238-239, this statement should be supported with data.

*Response:*

*We have conducted one-way analysis of variance (ANOVA) test on both spatial and temporal variability of PM<sub>2.5</sub> mass. The results are included in SI Table S3, and the P-values are added in lines 268 – 272, “The highest mass concentrations were recorded at CHI during winter ( $P < 0.01$ ; Table S3) and STL during summer ( $P < 0.05$ ), while BON exhibited the lowest concentrations in all seasons, except fall when the mass concentrations were lowest at CMP ( $P < 0.05$ ). Other than these minor variations, the PM<sub>2.5</sub> mass concentrations are both spatially and temporally homogeneous in the Midwest US with no significant seasonal differences ( $P > 0.05$  at most sites).” We also added median values in lines 265 – 268, “Generally, the more urbanized sites of our study (i.e. CHI, STL and IND) showed slightly higher mass concentrations (5.7 – 21.7  $\mu\text{g}/\text{m}^3$ , median: 11.8  $\mu\text{g}/\text{m}^3$ ) compared to the smaller cities like CMP and its rural component (i.e. BON) (2.0 – 20.2  $\mu\text{g}/\text{m}^3$ , median: 9.2  $\mu\text{g}/\text{m}^3$ ).” to support our statement.*

Line 274, typo, change “into” to “in”?

*Response:*

*We have made this change.*

How do the authors explain the data where OP in water extracts is greater than OP methanol when it is established that methanol extracts water soluble species plus organic species? Seems this result demonstrates the lack of precision of the methanol method. Or are the authors implying that some water soluble species that contribute to OP are not extracted and detected in the methanol method?

*Response:*

*We do not agree with the reviewer on the lack of precision of the method for methanol extraction and analysis. As shown in Table 1 of the response document, the precision of methanol-soluble OP is as good as water-soluble OP.*

*The measured OP of PM is not simply the addition of the activities of all extracted PM components. Previous studies have reported both synergistic and antagonistic interactions among transition metals and organic species in multiple endpoints, such as  $OP^{AA}$  (Lin and Yu, 2020, 2021),  $OP^{OH-SLF}$  (Gonzalez et al., 2017; Wei et al., 2018; Charrier and Anastasio, 2015),  $OP^{DTT}$  (Yu et al., 2018; Xiong et al., 2017) and  $OP^{OH-DTT}$  (Yu et al., 2018; Xiong et al., 2017). Hence, lower methanol-soluble OP does not necessarily imply fewer extracted species in methanol. Here, we infer that the lower methanol-soluble  $OP^{AA}_v$  than water-soluble  $OP^{AA}_v$  might be attributed to the antagonistic effect from the additional components in methanol-soluble extracts. Lin and Yu (2020) reported an antagonistic interaction between HULIS extracted from rice straws burning and Cu on  $OP^{AA}_v$ . They found an abundance of alkaloid compounds in the HULIS, which can chelate Cu and reduce its reactivity with AA. Although we have not yet conducted chemical composition analysis, it is possible that the  $PM_{2.5}$  samples collected at CMP could be strongly impacted by biomass burning sources and therefore could contain high levels of alkaloids. Our previous studies also found an elevated level of Cu [up to  $60 \text{ ng/m}^3$ , compared to the typical Cu concentration ( $4 - 20 \text{ ng/m}^3$ ) at most urban sites in US (Baumann et al., 2008; Buzcu-Guven et al., 2007; Hammond et al., 2008; Kundu and Stone, 2014; Lee and Hopke, 2006; Milando et al., 2016)] at CMP (Wang et al., 2018; Puthussery et al., 2018). Since many of the alkaloid compounds are methanol-soluble but water-insoluble, it is possible that these compounds are more efficiently extracted in methanol and are complexed with a large fraction of Cu, thus causing lower levels of methanol-soluble  $OP^{AA}_v$  compared to water-soluble  $OP^{AA}_v$  at CMP. We have included this inference in lines 346 – 355 of the original preprint and lines 467 – 479 in the revised manuscript.*

What is the difference between methanol soluble OP and methods that attempt to measure all OP, eg, that associated with surfaces of solid particles?

*Response:*

*The methanol-soluble OP measured in our study cannot be called the total OP measured by Gao et al. (2017). In our method, we sonicated punches of  $PM_{2.5}$  filters in methanol, and filtered the suspensions through a  $0.45 \mu\text{m}$  PTFE syringe filter. The filtered extracts were then concentrated to less than  $50 \mu\text{L}$  using a nitrogen dryer to evaporate methanol and were subsequently reconstituted in deionized water (DI). In comparison to this method, Gao et al. (2017) (cited in Table S2) measured  $OP^{DTT}$  by three methods. In their first method, they extracted the filters sequentially in water followed by methanol. After sonication, both suspensions were filtered through a  $0.45 \mu\text{m}$  PTFE syringe filter. The subsequent methanol extracts were concentrated to  $\sim 200 \mu\text{L}$  by evaporating methanol, and were then reconstituted in DI. Note, neither ours (direct extraction in methanol followed by filtration) nor their first method (sequential extraction followed by filtration) measure the activity of methanol-insoluble fraction of  $PM_{2.5}$  and therefore cannot be termed as total OP.*

*In Gao et al. (2017)'s second method, they directly sonicated punches of  $PM_{2.5}$  filters in methanol and removed the filter punches after sonication. The methanol extracts were concentrated to  $\sim 200 \mu\text{L}$  without being filtered, and were then reconstituted in DI. This method could include the activity of water-insoluble and also methanol-insoluble species via surface reaction, but probably not to 100 % efficiency because some of the particles could always remain on the filter fibers irrespective of the solvent used for extraction.*

*In Gao et al. (2017)'s third method, they sonicated filter punches in a mixture of DI and potassium phosphate buffer (K-PB, pH = 7.4) and directly measured OP of the suspensions containing filter punches, without filtering anything. Since this method includes the contribution of even those particles which are not extracted and remain on the filters, we believe that out of all these methods, only this approach can be termed as the total OP. This was further demonstrated from the results of Gao et al. (2017), showing a 5 – 18 % higher average  $OP^{DTT}$  obtained from this method compared to earlier two methods.*

*Overall, the " $OP^{DTT}$ " obtained from their first method (i.e. the summation of water-soluble OP and the subsequent methanol-soluble OP) was most similar with the methanol-soluble OP measured in our study, but none of them can be considered as the "total OP".*

## **Reviewer: Anonymous Reviewer #1**

In this work, the authors measured oxidative potential (OP) of particulate matter in five urban areas in midwestern US. Particulate matter (PM) is a significant health hazard, and its oxidative potential is thought to be representative of its toxicity. The authors assessed oxidative potential in 5 different endpoints on a weekly basis. These OP measurements are often difficult to make, but the authors had developed a system to automate the measurements of PM on filters. The results from the study showed large variabilities across sites and endpoints, and these variabilities, along with poor correlation with PM mass, suggest that PM<sub>2.5</sub> mass alone is a poor indicator of potential health impacts. The discussion of the results was not very deep, and, in many cases, more detailed exploration is encouraged to better understand these results. In general, the manuscript is well written, but some of the main messages can be more clearly communicated, rather than buried in a lot of numbers and text. I believe that this manuscript should be published in ACP after some major revisions.

*Response:*

*We thank the reviewer for providing these valuable comments. In the revised manuscript, we have tried our best to reduce the unnecessary information (such as numbers and text) so that the main message of our study become clear. We have also enriched our discussion as well as the conclusion to explicitly state the main take-away message from our exploration. In the following section, we have addressed the reviewer's comments on point-by-point basis.*

Major comments:

In general, this work reads like a measurement report. I was very impressed by the ability to make all these measurements, but somewhat disappointed with the lack of insights from the measurements. More specifically:

- A lot of information about each site was given in Section 2.1, but when discussing the spatiotemporal variability, there is virtually no discussion in these contexts in Section 3.3. Why does CMP behave so differently? What are the spikes? The same goes for Section 3.5, where the site-to-site comparison is discussed in the context of some statistical measures (correlation coefficient, COD). Again, what are the physical insights?

Response:

*This is the first manuscript in the series of papers we plan to write from our yearlong Midwest sampling campaign. In addition to the OP analysis, we are also conducting a lot of chemical and mechanistic analysis (e.g. separation of PM components) on these samples, which we plan to present in our subsequent manuscripts. The current manuscript is expected to serve as the reference for all those subsequent papers and therefore we have to provide as much information as possible about the sampling sites in this manuscript. We understand that all of this information might not be relevant at the current stage given this manuscript is limited to only OP analysis. However, we believe that as our further analysis (i.e. chemical and mechanistic analysis) will emerge, some of this information could become relevant. We further note that the scope of this manuscript was to discuss the patterns of spatiotemporal variability of PM<sub>2.5</sub> OP in the Midwest US. Therefore, description of the site features in Section 2.1 was intended to justify different classification of the sites, i.e. urban, roadside and rural.*

“Why does CMP behave so differently? What are the spikes?”

*CMP was the only site which was adjacent (< 10 m) to a major urban road (University Avenue in Urbana, IL) and was on the roof of a parking garage, indicating that PM<sub>2.5</sub> collected at this site was directly impacted by the daily traffic. Our previous study conducted at the same site, Wang et al. (2018) has reported large variations in several redox-active metals, including Cu (4 – 60 ng/m<sup>3</sup>), Fe (2 – 15 ng/m<sup>3</sup>), Mn (0.4 – 3 ng/m<sup>3</sup>), Pb (0.02 – 2.5 ng/m<sup>3</sup>) and Zn (3 – 10.5 ng/m<sup>3</sup>), which are all related with the vehicles (both exhaust and non-exhaust emissions). Since the spikes occurring in water-soluble OP at CMP (Figure 3) were generally observed for SLF-based endpoints (i.e. OP<sup>AA</sup>, OP<sup>GSH</sup> and OP<sup>OH-SLF</sup>), which are all known to be highly sensitive towards metals (Ayres et al., 2008; Calas et al., 2018; Fang et al., 2016; Moreno et al., 2017; Charrier and Anastasio, 2015; Wei et al., 2018), we expect a larger contribution of the variation in daily traffic intensity in the spikes observed at CMP. Note, the OP<sup>AA</sup> – an endpoint known to be highly sensitive towards Cu (Ayres et al., 2008; Gaetke and Chow, 2003) emitted from brake wear (Hulskotte et al., 2007; Garg et al., 2000; Gietl et al., 2010), showed the most frequent spikes. In comparison to CMP, all other sites were relevantly farther (closest was STL ~230 m) to be directly affected by the road emissions. Thus, such a different behavior of CMP is probably related to its close proximity to a major roadway. We have included this discussion in lines 319 – 327, “A significant temporal variation was observed for CMP with several spikes in the OP activities throughout the year, most prominently for OP<sup>AA</sup> (Figure 3). These spikes might be attributed to the traffic, as CMP is the only site adjacent (< 10 m) to a major urban road and located on the roof of a parking garage. One of our previous studies, Wang et al. (2018), reported large variations in several redox-active metals (e.g. Cu, Fe, Mn, Pb and Zn), which have been known to be related with the vehicular emissions (Hulskotte et al., 2007; Garg et al., 2000; Gietl et al., 2010; Apeageyi et al., 2011; Councell et al., 2004) at the same CMP site. Since SLF-based endpoints have been shown to be highly sensitive towards metals (Ayres et al., 2008; Calas et al., 2018; Fang et al., 2016; Moreno et al., 2017; Charrier and Anastasio, 2015; Wei et al., 2018), the temporal variation in traffic intensity probably contributes to the spikes observed at CMP. ”*

“The same goes for Section 3.5, where the site-to-site comparison is discussed in the context of some statistical measures (correlation coefficient, COD). Again, what are the physical insights? ”

*The coefficient of divergence (COD) is a standard measure which has been used in several past studies to explore the spatiotemporal variability in an environmental attribute (Kim et al., 2005; Cheung et al., 2011; Massoud et al., 2011; Verma et al., 2011; Daher et al., 2013; Fang et al., 2014; Huang et al., 2015; Gao et al., 2017; Mukherjee et al., 2019; Feinberg et al., 2019). The primary purpose of Section 3.5 was to compare the COD and correlation coefficient (r) for different OP endpoints versus mass concentration of PM<sub>2.5</sub>. We believe that the key physical insight from section 3.5 (section 3.4 in the revised manuscript) is that there is a larger spatial variability in OP than the PM<sub>2.5</sub> mass, as revealed from the CODs and r, indicating that the spatial distributions for OP are potentially more affected by the chemical components rather than PM<sub>2.5</sub> mass. Large variations and weak correlations in most OP endpoints among different sites indicate a more significant effect of the local sources on OP compared to the regional sources. This message has been clearly outlined in lines 518 – 520.*

- Lines 257 to 280 were very hard to follow. The discussion jumped around from OP measure to another (sometimes mass-normalized, other times volume-normalized). The OP endpoints from this particular study were compared to those reported in the literature, but the discussion focuses on very shallow comparisons (e.g. higher, lower, different, the same). I am very confused about the purpose of this discussion: are these comparisons meant to validate the measurements? Are they meant to highlight the differences to illustrate differences between sources, or site characteristics? Are we expecting the OPs to be the same, or different from previous studies? My suggestion is to focus on some main message, and then show the comparisons that illustrate the point.

*Response:*

*We apologize for the reviewer's confusion. However, we differ from the reviewer's point on the discussion jumping from one OP measure to another (sometimes mass-normalized, other times volume-normalized). We are actually following a consistent structure for discussing these five endpoints in the entire manuscript (including this section). SLF-based endpoints were generally discussed first, in the sequence of OP<sup>AA</sup>, OP<sup>GSH</sup> and OP<sup>OH-SLF</sup>, followed by DTT-based endpoints (first OP<sup>DTT</sup>, and then OP<sup>OH-DTT</sup>). For each endpoint, we first discuss the mass-normalized OP, and then volume-normalized OP. Methanol-soluble OP were discussed after water-soluble OP, following the same sequence as described above. We suggest the reviewer to keep this flow in mind when reading the lines 257 – 280 to avoid any confusion.*

*The reviewer is correct that the primary purpose of this section was to compare our measurements with those reported in the literature. Here, we have compared the OP obtained from our study with OP activities reported from previous literature using the same or similar techniques as ours. In fact, we have further expanded Table S2 (Table S6 in the revised manuscript), by including the methodology of the assays, following the suggestion of another reviewer (#2), who has appreciated this comparison. Since this is the largest dataset on the OP of PM<sub>2.5</sub> in the Midwest US, and is one of very few studies in US, where all these OP endpoints have been measured on the same set of samples, we think that it is imperative to have a perspective on the general levels of OP in the Midwest US with the rest of the country and the world. Following the reviewer's suggestion, we have clearly expressed the purpose of this section at the beginning of this paragraph in the revised manuscript (lines 360 – 362).*

*From Table S6, we found that the activities of most OP endpoints measured in our study were generally comparable with the previous literature, i.e. in the typical ranges of previously reported OP levels. Regarding the reviewer's point of illustrating the differences between sources, or site characteristics, we don't think it is practical to have it in our manuscript. There are around 20 studies conducted in more than 30 places cited in this section. It is clearly beyond our scope to look into the site characteristics of all these studies and explain our OP results based on that. Moreover, as we have mentioned earlier, we plan to discuss the source apportionment results in our subsequent manuscripts, where we could consider to compare the sources in the Midwest US from other regions, as appropriate. But, we don't think it fits in the scope of the current manuscript.*

- How are we supposed to make sense of the large differences between the various endpoints? They are different measures and operate differently, so they are expected to be different. So, if they are significantly different, then what? The suggestion from the authors is to measure all of them, but then how do we make sense of the different numbers, or trends? A closer examination of what each OP is measuring (and what chemical components are most linked with each measure) would be useful.

*Response:*

*We thank the reviewer. This comment is similar to the 1<sup>st</sup> comment raised by Reviewer #2. Therefore, we would encourage the reviewer to also read our response to that comment (Pages 1 – 4 of this response document). To the specific points raised by this reviewer, we would like to address them one by one:*

“How are we supposed to make sense of the large differences between the various endpoints? They are different measures and operate differently, so they are expected to be different.”

*Yes, these are different measures and operate differently; however, they still come under the umbrella term of “OP” and in the scientific community, they have been often used interchangeably. Therefore, it is logically curious to know if they really produce different results and if so, to what extent, towards the same PM<sub>2.5</sub>. It would be somewhat irrational to assert that without measuring all of them and comparing their outcomes from the same set of PM<sub>2.5</sub> samples. There have been some studies in the past which have compared their responses on the same set of samples but these are either based on small sample size or have used only few selected assays. A systematic comparison of all these OP assays, particularly in geographical regions of the United States, is lacking and this is the gap our study is trying to fill-in.*

“So, if they are significantly different, then what? The suggestion from the authors is to measure all of them, but then how do we make sense of the different numbers, or trends?”

*This is a good question. From our current investigation, we cannot say which of these assays is the best in terms of representing the health effects. All we know is that the responses of these assays do not correlate with each other. To understand the health relevance of these assays, we first need to integrate them in an epidemiological study, which is beyond the scope of our current study. Some previous studies have adopted this approach for investigating the health relevance of OP by associating it with the health endpoints (Abrams et al., 2017;Strak et al., 2017;Zhang et al.,*



2016;Yang et al., 2016;Weichenthal et al., 2016a;He et al., 2021;Janssen et al., 2015). These studies have definitely helped in enhancing our understanding on the relevance of OP measurements and the role of specific endpoints in comparison to the PM mass. However, these are very limited with their focus only on 2 or 3 endpoints. Incorporating all the available OP endpoints measured on the same set of samples in epidemiological studies, will help to clearly see their roles and rank them as per their relevance. Therefore, what we mean by “measure all of them” is to develop a database on all these endpoints so that it can be integrated in the epidemiological studies. This will eventually help to evaluate their associations with the health effects and rank them based on their biological relevance. We have modified our discussion on lines 576 – 585 to further clarify our point, “Overall, a poor-to-moderate and inconstant intercorrelation trend among different endpoints of both water-soluble and methanol-soluble OP at most sites indicates that all these assays could be deficient from being ideal and measuring a single endpoint is not enough to represent the overall OP activity. Although the OP endpoints used in our study have covered some of the well-known and important pathways of the *in vivo* oxidative stress caused by PM<sub>2.5</sub>, there are other endpoints (e.g. consumption of cysteine, formation of H<sub>2</sub>O<sub>2</sub>, etc.), and more assays can be developed in the future. We suggest that a collection of diverse range of OP endpoints, measured separately as done in our study could better capture the role of different PM components and their interactions via different pathways for driving the oxidative levels of the PM in a region. However, it should be noted that our study is not designed to assess and rank the biological relevance of these acellular endpoints, which will require an integration of these and possibly other novel assays involving different routes of oxidative stress, in either toxicological or epidemiological studies.”

- Given that ACP is an chemistry-focused journal, I believe that discussion of chemical composition is well within the scope of this manuscript, and should not be separated for a later publication. Chemical composition is central to many of the questions I posed, and including some information of composition is necessary to make sense of these measurements.

*Response:*

We partly agree with the reviewer’s comment that chemical composition could explain some of the questions raised by the reviewer. However, at the same we want the reviewer to understand that unlike OP, chemical composition is not about making 4 or 5 measurements. We are currently in the process of measuring several chemical species which include EC, OC, WSOC, NO<sub>3</sub><sup>-</sup>, SO<sub>4</sub><sup>-2</sup>, NH<sub>4</sub><sup>+</sup>, trace elements (Cu, Fe, Mn, Zn, K, Al, V, Cr, Ni, Sr, Ba, Pb, As and Se), brown carbon, PAHs, hopanes, steranes, alkanes, organic acids and organic nitrogen compounds. Since OP is property inherently linked with the chemical components and their sources, we believe that to properly explain the trends of various OP endpoints, we really need to measure all of these species which have been directly or indirectly linked with the OP. Moreover, before linking the chemical components with OP, we will need to explain their spatiotemporal trends as well. Given current length of the manuscript (18 pages), including all this information will further complicate and convolute the clear message (i.e. the divergent behavior of OP vs. PM<sub>2.5</sub> mass), it is currently delivering. Again, we agree that chemical composition is important for the OP, but it is not so straight forward. The previous research from our own group (Xiong et al., 2017;Yu et al., 2018) and others (Charrier and Anastasio, 2015;Gonzalez et al., 2017;Lin and Yu, 2020, 2021;Dou et al., 2015) have shown that there are both synergistic and antagonistic interaction among the PM

*chemical components to alter an OP response. Including some description of the chemical components in the current manuscript might allow us to conduct a shallow analysis of their linkages with the OP, but will prevent us to conduct a thorough analysis in the future manuscript, which we think is more important. Therefore, we believe this should be a separate topic altogether in which we will not only link the OP with the chemical components, but also their interactions as well as their sources, and we plan to address it in our next manuscript. Including all these analysis in the current manuscript, which is focused on exploring the spatiotemporal trends of OP in the Midwest US and its comparison with the PM<sub>2.5</sub> mass, will unnecessarily lengthen it and mix the important messages we plan to provide through these investigations.*

Minor comments:

- Line 18 and elsewhere: it might useful to define what volume means. Presumably this is air volume, not particle volume

*Response:*

*Yes, the “volume” in “volume-normalized OP” is the volume of sampled air for PM<sub>2.5</sub> samples analyzed for a particular OP endpoint. We have clarified this term in the revised manuscript in lines 236 – 239, “The mass-normalized (intrinsic, OP<sub>m</sub>) and volume-normalized (extrinsic, OP<sub>v</sub>) OP levels were obtained by dividing the blank corrected OP activities by the extracted PM<sub>2.5</sub> mass (for OP<sub>m</sub>) and by the volume of air collected on the extracted fractions of filters (for OP<sub>v</sub>), respectively. The detailed calculations of OP<sub>m</sub> and OP<sub>v</sub> have been previously described in Yu et al. (2020).”*

- The introduction is very well-written and reflects the current state of knowledge.

*Response:*

*We thank the reviewer for their comment. We have further enriched the introduction by including more references in lines 64 – 73 , “Calas et al. (2018) compared the responses of several OP endpoints [i.e. OP<sup>DTT</sup>, OP<sup>AA</sup>, OP<sup>GSH</sup>, and electron spin resonance (OP<sup>ESR</sup>)] on PM<sub>10</sub> samples (N = 98) collected from Chamonix (France). Yang et al. (2014) also used four OP endpoints [OP<sup>AA</sup>, OP<sup>DTT</sup>, OP<sup>ESR</sup> and reductive acridinium triggering (OP<sup>CRAT</sup>)] to investigate the effect of different extraction solvents and filter types on OP responses using the PM<sub>2.5</sub> samples (N = 20) collected from two cities (Rotterdam and Amsterdam) in Netherland. The comparison of OP<sup>AA</sup>, OP<sup>DTT</sup> and OP<sup>GSH</sup> has been shown in two studies (Fang et al., 2016;Gao et al., 2020), both from the southeast US. We are not aware of any study which has compared ·OH generation in SLF or DTT with other endpoints based on antioxidants consumption (e.g. AA or GSH consumption). Clearly, the studies systematically comparing the responses of these different endpoints on a large sample-set collected at an extensive spatial scale, particularly in the United States are very limited.”, and lines 82 – 89, “Globally, the spatiotemporal profiles of OP have been characterized for some geographical regions such as Los Angeles Basin (Saffari et al., 2014, 2013), Denver (Zhang et al., 2008), Atlanta (Fang et al., 2016;Verma et al., 2014) in US, Ontario (Canada) (Jeong et al., 2020;Weichenthal et al., 2019;Weichenthal et al., 2016a), France (Borlaza et al., 2021;Calas et al., 2019;Weber et al., 2018;Weber et al., 2021), Italy (Cesari et al., 2019;Perrone et al.,*

*2019;Pietrogrande et al., 2018), Athens in Greece (Paraskevopoulou et al., 2019), Netherland (Yang et al., 2015a;Yang et al., 2015b), and some coastal cities of Bohai [Jinzhou, Tianjin and Yantai (Liu et al., 2018)] and Beijing (Yu et al., 2019;Liu et al., 2014) in China.”*

- Lines 85-93: this might be a good place to define some research questions and hypotheses, and address them accordingly at the end. It will help with adding some depth to the discussion and going beyond just reporting measurements.

*Response:*

*We thank the reviewer for their valuable suggestion. We have revised this paragraph to include the research questions of this manuscript and clearly state our hypothesis. The revised paragraphs in lines 100 – 102 read as, “The goal of this analysis is to compare the spatiotemporal distribution of PM<sub>2.5</sub> OP with that of the mass concentrations. We also want to investigate if different measures of OP, i.e. OP<sup>AA</sup>, OP<sup>GSH</sup>, OP<sup>OH-SLF</sup>, OP<sup>DTT</sup> and OP<sup>OH-DTT</sup> show different spatiotemporal trends or are correlated with each other.” The research questions raised here are subsequently addressed in different sections (Sections 3.1, 3.2, 3.4 and 3.6) of the manuscript. We have further tried to clarify the main message of our analysis in these sections.*

- Line 100: “Chicago, Indianapolis and St. Louis” seem redundant.

*Response:*

*We have corrected this sentence in the revised manuscript in lines 111 – 113, “while three major city sites [i.e. Chicago (CHI), Indianapolis (IND) and St. Louis (STL)] are representatives of urban background regions of these respective cities.”*

- Section 2.2: are the methanol extracts also kept the same PM mass for OP measurement? In the water soluble extract, the volume of water was adjusted to achieve the same mass; how was this done for the methanol soluble extract?

*Response:*

*Yes, the concentrations of PM<sub>2.5</sub> in the reaction mixtures used for methanol-soluble OP were kept same as those for water-soluble OP measurement (i.e. 50 µg/mL for SLF-based endpoints, and 30 µg/mL for DTT-based endpoints). We first extracted the same area of the filters as that used for the water-soluble OP in 10 mL methanol, and then filtered the extracts through a 0.45 µm PTFE syringe filter. Methanol in the filtered extracts was then evaporated using a nitrogen dryer, and the dried methanol extracts were reconstituted in DI to reach exactly the same volume as the corresponding water-soluble extracts. We have included this detail on lines 176 – 178 of the revised manuscript, “The filtered extracts were then concentrated to less than 50 µL using a nitrogen dryer to evaporate methanol, and were subsequently reconstituted in DI to the exact same volume as the water-soluble extracts.”*

- Line 160: when the dried methanol extract was reconstituted in water (DI water), are there insoluble components? For example, I can imagine some organic compounds are extracted by

methanol and stick to the walls of the vial when dried, but does not dissolve in water during reconstitution.

*Response:*

*This is a reasonable point. To minimize the bias caused by this deposition loss, we never completely dried the methanol extracts. Rather, we evaporated them to ~50  $\mu\text{L}$ , followed by addition of water to allow the resuspension of the water-insoluble species in water. Moreover, the DI-reconstituted methanol-soluble extracts were always vigorously shaken using an analog vortex mixer (VWR International, Batavia, IL, US) for at least 60 seconds at 3200 rpm to ensure a thorough flush of the organic species which could have been deposited along the wall of the vials. We have revised our manuscript to include these details in lines 176 – 180, “The filtered extracts were then concentrated to less than 50  $\mu\text{L}$  using a nitrogen dryer to evaporate methanol, and were subsequently reconstituted in DI to the exact same volume as the water-soluble extracts. Reconstituted methanol extracts were vigorously shaken on an analog vortex mixer (VWR International, Batavia, IL, US) for at least 60 seconds at 3200 rpm to ensure a thorough flushing of the components probably deposited along the wall of the vials during evaporation.”*

- Lines 235-236: 5.7-21.7 does not seem to be significantly higher than 2.0-20.2. Perhaps show the median?

*Response:*

*We thank the reviewer’s suggestion. We have included the median of the  $\text{PM}_{2.5}$  mass concentrations in lines 265 – 268, “Generally, the more urbanized sites of our study (i.e. CHI, STL and IND) showed slightly higher mass concentrations (5.7 – 21.7  $\mu\text{g}/\text{m}^3$ , median: 11.8  $\mu\text{g}/\text{m}^3$ ) compared to the smaller cities like CMP and its rural component (i.e. BON) (2.0 – 20.2  $\mu\text{g}/\text{m}^3$ , median: 9.2  $\mu\text{g}/\text{m}^3$ )”. As can be seen, the median at more urbanized sites is slightly higher than the small city sites.*

- Lines 240 and 281: how is the “time series” different from the temporal variation in “spatiotemporal variation”? There are a lot of overlapping points between Sections 3.2 and 3.3, and these sections are be significantly combined and condensed for easier reading. Or perhaps the author intended the discussions to be separate, and if so, it would be good to convey the differences in the section titles.

*Response:*

*Figure 3 and 4 (described in section 3.2) gives a snapshot of the overall trend of OP at all the sites. Although, the time-series plot with all its data points gives an idea of the overall picture, it is unable to clearly illustrate the seasonal and spatial variations, which can be easily masked by the outliers or extreme values. To quantify these variations, we computed the seasonal averages ( $\pm$  standard deviation), which are shown in Figures 5 and 6 (described in section 3.3). However, we agree with the reviewer that both sections are essentially focused on explaining the spatiotemporal variability. Therefore, we combined sections 3.2 and 3.3 in the revised manuscript as “Section 3.2 Spatiotemporal variation in  $\text{PM}_{2.5}$  OP”, and rearranged the paragraphs for a*

*more clarified discussion, while retaining all four figures (i.e. Figures 3-6) for their original purposes.*

- Line 248-249: Just want to confirm: In line 217, the July 4th data were excluded from the regression analysis, but are included here in the discussion. It is a little confusing; perhaps some slight clarification would be useful.

*Response:*

*Yes, the OP data in the week of July 4<sup>th</sup> were included in the analysis of spatiotemporal variability but excluded from the regression analysis. This is to avoid the potential bias caused by a strong but an episodic event in the regression analysis. We have clarified this in the revised manuscript in lines 247 – 250, “All PM<sub>2.5</sub> samples were assessed for spatiotemporal variability. However, since several OP endpoints (e.g. OP<sup>AA</sup>, OP<sup>GSH</sup> and OP<sup>DTT</sup>) were abnormally elevated in the week of July 4th (Independence Day celebration; discussed in section 3.2), we removed this week’s sample from our regression analysis to avoid any bias caused by this episodic event.”*

- Line 294: why is different from SE US? The seasonal trend seems to be related to photochemical activity (higher in the summer). In general, the midwestern US provides an interesting contrast to previous studies because it has larger temperature differences between summer and winter.

*Response:*

*We thank the reviewer for this interesting observation. We agree that the midwestern US provides an interesting contrast to the previous studies given the larger temperature differences (up to 100 °F) between summer and winter here. This large temperature variation could drive the seasonal variability to some extent. However, it could be that the emission sources in these two seasons (summer vs. winter) are substantially different. For example, Verma et al. (2014) reported highest contributions to OP<sup>DTT</sup> from biomass burning in winter (47 %) and from secondary organic aerosol in summer (46 %). Higher OP<sup>DTT</sup> during winter in the Southeast US was attributed to the higher intrinsic redox activity of biomass burning aerosols than those formed during secondary oxidation (Verma et al., 2015). Since we haven’t yet done the source apportionment on this dataset, it would be unreasonable to compare the dominant sources (and their seasonality) for OP of our study with Verma et al. (2014). However, we plan to investigate these differences in our subsequent publication.*

- Line 350-355: this seems like a somewhat handwavy explanation for an anomaly, not really supported by evidence. What is the evidence for significant alkaloid compounds at this one particular site? Are there other studies that show Cu can complex with organic compounds and reduce OP?

*Response:*

*We agree that from our study, there is no direct evidence for the high levels of alkaloid compounds at CMP. However, the antagonistic interactions between Cu and certain organic species on OP*

have been reported in multiple studies. Our previous studies also revealed antagonistic interaction of Cu with quinones, Suwannee River fulvic acid (SRFA) and ambient humic-like substances (HULIS) for both  $OP^{DTT}$  and  $OP^{OH-DTT}$  (Xiong et al., 2017; Yu et al., 2018). Pietrogrande et al. (2019) also found a suppressing effect of Cu complexing with citric acid on  $OP^{AA}$ , further substantiating the role of Cu complexes on reducing the OP. In addition to the antagonistic effect of Cu and alkaloid compounds on  $OP^{AA}$ , Lin and Yu (2020) also found a substantial antagonistic interaction between hydrophilic fraction (which contains high amount of metals) and hydrophobic fraction (mainly organic species) on  $OP^{OH-SLF}$ . All these studies indicate that the complexation of Cu with organic species has an important role on reducing the OP for various endpoints. Note, the ranges and medians of  $M/W^{OP}$  were generally the lowest at CMP for all endpoints (Figure 7), which implies that the complexes of Cu with alkaloid compounds which are efficiently extracted in methanol could probably be responsible for this trend.

Considering the reviewer's point that we have not made the specific measurements of these species, we have further toned down our hypothesis based on Cu-complexation with organic compounds in general to explain these results in lines 473 – 479, "The unprotonated nitrogen atom in alkaloids tends to chelate Cu, thus reducing its reactivity with AA. The antagonistic effect of Cu have been reported with other organic compounds (e.g. citric acid) as well (Pietrogrande et al., 2019). Thus, apparently lower levels of methanol-soluble  $OP^{AA}$  compared to the water-soluble  $OP^{AA}$  at CMP might be associated with the chelation of Cu by these alkaloids or other organic species, which could be more efficiently extracted in methanol."

- Lines 356-368: why focus on Fe-organic complex? The simpler explanation would be organic compounds that contribute to OP that extracted in methanol but not in water.

*Response:*

We partially agree with the reviewer that the water-insoluble organic species extracted in methanol could also contribute to the elevated  $OP^{OH-SLF}$  and  $OP^{OH-DTT}$ , however we don't think that this mechanism alone is able to explain the level of elevation observed for these two endpoints (median of  $M/W^{OP} = 2.1 - 3.8$  and  $1.4 - 1.9$  for  $OP^{OH-SLF}$  and  $OP^{OH-DTT}$ , respectively). Our previous study, Yu et al. (2018) reported moderate activities of  $OP^{OH-DTT}$  from multiple types of organic species, including four different quinones, SRFA and ambient HULIS, and nearly zero activity from  $Fe^{2+}$  ion. However, much higher activities were observed when mixing  $Fe^{2+}$  with all types of organic species (interaction factor, defined as the ratio of the activity of the mixture over the sum of their individual activities =  $1.38 - 2.87$ ), indicating the synergistic effect of Fe with organic species for generation  $\cdot OH$  in DTT. Similarly, Gonzalez et al. (2017) and (Wei et al., 2018) also showed a strong synergistic interaction of  $Fe^{2+}$  and SRFA through complexation in  $OP^{OH-SLF}$ . These evidences strongly suggest that complexes of  $Fe^{2+}$  with organic compounds have a prominent role in  $\cdot OH$  formation. Wei et al. (2018) also observed that a substantial fraction of Fe gets complexed with hydrophobic organic compounds ( $28 \pm 22$  %), which is more efficiently extracted in methanol than water. Moreover, the seasonality of methanol-extracted Fe observed in Wei et al. (2018) followed the same trend as the  $M/W^{OP}$  in our study, i.e. the ratio of Fe in 50 % methanol to that in water and  $M/W^{OP}$  for  $OP^{OH-SLF}$  in our study were both higher in winter than summer, further suggesting the contribution of Fe-complexes to the increased  $OP^{OH-SLF}$  and  $OP^{OH-DTT}$  activities of methanol-soluble extracts compared to water-soluble extracts. Therefore, we

would like to keep our hypothesis based on Fe-organic complexes to explain these results. However, following the reviewer's suggestion we have also included the possibility of higher OP contributed by the organic compounds extracted in methanol, in lines 482 – 484, “In addition to ·OH-active organic species, e.g. quinones (Charrier and Anastasio, 2015; Xiong et al., 2017; Yu et al., 2018), which are more soluble in methanol, we suspect that one of such components could be organic-complexed Fe.”

- Section 3.6: My suggestion is to point out that current regulations focus on PM mass only, and these results show how inadequate this approach may be. (The reason I suggest this is, at first, I felt it was obvious that OP<sub>m</sub> would not correlate with PM mass and was somewhat puzzled by the need to do this analysis. But upon second thought, this analysis is useful in a regulatory context.)

*Response:*

We thank the reviewer for this very important point. We have included it in our discussion in section 3.5 (lines 551 – 552) in the revised manuscript. However, we would like to clarify that we conducted the regression analysis between volume-normalized OP (i.e. OP<sub>v</sub> and not OP<sub>m</sub>, which is mass-normalized OP) and PM<sub>2.5</sub> mass concentrations in Section 3.6. We believe this is what the reviewer meant when they mentioned about the correlation analysis. Since OP<sub>m</sub> is already normalized by the PM mass, it does not make sense to conduct the correlation between OP<sub>m</sub> and PM mass. Instead OP<sub>v</sub> is a property which is in the same equivalent units, i.e. nmol/min/m<sup>3</sup> of air as the PM mass (µg/m<sup>3</sup> of air), and therefore, they are comparable to perform the regression analysis.

- Line 474: “the results ... provide”, not “provides”

*Response:*

We have corrected this typo in line 616 of the revised manuscript.

- Figures and tables are generally too complex

*Response:*

We apologize but we would appreciate if the reviewer could specifically point out which of the figures/tables are complex. We have tried our best to clearly show the information in our figures. All of the figures are either time-series (Figures 2-4), bar charts (Figures 5, 6, 8 and 9) or box-plots (Figure 7), which we believe are very easy to interpret. To make them more legible, we have increased the font sizes of all these figures.

Moreover, we have tried to simplify our tables. Specifically, we have combined the average and standard deviation in one column in Table 1, and replaced the P-values with asterisk symbols (\* denotes  $P < 0.05$ , \*\* denotes  $P < 0.01$ ) in Tables 3-5.

## Community: Samuel Weber

The present study reports the intercomparison of oxidative potential (OP) of PM using different metrics of OP and different extraction protocols. As no consensus has emerged towards which OP method to use, this study is of great interest for documenting various approaches.

However, it should be clarified that it is not the first study of its sort. Namely, Calas et al (2017) have investigated the role of solvent and extraction method and Calas et al (2018) already investigated 5 different OP end-points in Chamonix, France.

Moreover, there is an effort in this manuscript to refer to previous campaign all over the world. We would like to mention to the authors that numerous recent studies in Europe have also reported oxidative potential measurement with multiple assays and have investigated site specificity (Weber et al (2018), Cesari et al (2019), Paraskevopoulou et al (2019), Peronne et al (2019), Pietrogrande et al (2018)), including large-scale variability (Calas et al (2019), Weber et al (2021)) and small-scale variability of OP (Borlaza et al (2021)).

Even if some of the cited studies sampled PM<sub>10</sub> and not PM<sub>2.5</sub>, the discussion of the different OP tests and drivers of OP have been discussed in these papers. These studies should be included in the literature of this manuscript.

Calas, A., Uzu, G., Martins, J. M. F., Voisin, D., Spadini, L., Lacroix, T., and Jaffrezo, J.-L.: The importance of simulated lung fluid (SLF) extractions for a more relevant evaluation of the oxidative potential of particulate matter, *Sci Rep*, 7, 11617, <https://doi.org/10.1038/s41598-017-11979-3>, 2017.

Calas, A., Uzu, G., Kelly, F. J., Houdier, S., Martins, J. M. F., Thomas, F., Molton, F., Charron, A., Dunster, C., Oliete, A., Jacob, V., Besombes, J.-L., Chevrier, F., and Jaffrezo, J.-L.: Comparison between five acellular oxidative potential measurement assays performed with detailed chemistry on PM<sub>10</sub> samples from the city of Chamonix (France), 18, 7863–7875, <https://doi.org/10.5194/acp-18-7863-2018>, 2018.

Weber, S., Uzu, G., Calas, A., Chevrier, F., Besombes, J.-L., Charron, A., Salameh, D., Ježek, I., Močnik, G., and Jaffrezo, J.-L.: An apportionment method for the oxidative potential of atmospheric particulate matter sources: application to a one-year study in Chamonix, France, *Atmos. Chem. Phys.*, 18, 9617–9629, <https://doi.org/10.5194/acp-18-9617-2018>, 2018.

Cesari, D., Merico, E., Grasso, F. M., Decesari, S., Belosi, F., Manarini, F., De Nuntii, P., Rinaldi, M., Volpi, F., Gambaro, A., Morabito, E., and Contini, D.: Source Apportionment of PM<sub>2.5</sub> and of its Oxidative Potential in an Industrial Suburban Site in South Italy, 10, 758, <https://doi.org/10.3390/atmos10120758>, 2019.

Paraskevopoulou, D., Bougiatioti, A., Stavroulas, I., Fang, T., Lianou, M., Liakakou, E., Gerasopoulos, E., Weber, R. J., Nenes, A., and Mihalopoulos, N.: Yearlong variability of oxidative potential of particulate matter in an urban Mediterranean environment, *Atmospheric Environment*, 206, 183–196, <https://doi.org/10.1016/j.atmosenv.2019.02.027>, 2019.



Perrone, M. R., Bertoli, I., Romano, S., Russo, M., Rispoli, G., and Pietrogrande, M. C.: PM<sub>2.5</sub> and PM<sub>10</sub> oxidative potential at a Central Mediterranean Site: Contrasts between dithiothreitol- and ascorbic acid-measured values in relation with particle size and chemical composition, *Atmospheric Environment*, 210, 143–155, <https://doi.org/10.1016/j.atmosenv.2019.04.047>, 2019.

Pietrogrande, M. C., Perrone, M. R., Manarini, F., Romano, S., Udisti, R., and Becagli, S.: PM<sub>10</sub> oxidative potential at a Central Mediterranean Site: Association with chemical composition and meteorological parameters, *Atmospheric Environment*, 188, 97–111, <https://doi.org/10.1016/j.atmosenv.2018.06.013>, 2018.

Calas, A., Uzu, G., Besombes, J.-L., Martins, J. M. F., Redaelli, M., Weber, S., Charron, A., Albinet, A., Chevrier, F., Brulfert, G., Mesbah, B., Favez, O., and Jaffrezo, J.-L.: Seasonal Variations and Chemical Predictors of Oxidative Potential (OP) of Particulate Matter (PM), for Seven Urban French Sites, 10, 698, <https://doi.org/10.3390/atmos10110698>, 2019.

Weber, S., Uzu, G., Favez, O., Borlaza, L. J., Calas, A., Salameh, D., Chevrier, F., Allard, J., Besombes, J.-L., Albinet, A., Pontet, S., Mesbah, B., Gille, G., Zhang, S., Pallares, C., Leoz-Garziandia, E., and Jaffrezo, J.-L.: Source apportionment of atmospheric PM<sub>10</sub> Oxidative Potential: synthesis of 15 year-round urban datasets in France, 1–38, <https://doi.org/10.5194/acp-2021-77>, 2021.

Borlaza, L. J. S., Weber, S., Jaffrezo, J.-L., Houdier, S., Slama, R., Rieux, C., Albinet, A., Micallef, S., Trébluchon, C., and Uzu, G.: Disparities in particulate matter (PM<sub>10</sub>) origins and oxidative potential at a city-scale (Grenoble, France) &ndash; Part II: Sources of PM<sub>10</sub> oxidative potential using multiple linear regression analysis and the predictive applicability of multilayer perceptron neural network analysis, 1–33, <https://doi.org/10.5194/acp-2021-57>, 2021.

*Response:*

*We thank Samuel Weber for the useful comments. We agree that it is not the first study to analyze multi-endpoints OP, and there have been studies investigating the spatiotemporal variability and sources of OP using several endpoints. However, all of the studies cited by the reviewer are from Europe. We are not aware of any study which has investigated the spatiotemporal variability of more than 3 OP endpoints in the United States. At most, we could find only two studies both from Southeast US (Atlanta, GA), one of which has compared only two OP endpoints ( $OP^{DTT}$  and  $OP^{AA}$ ) (Fang et al., 2016) and another has compared three endpoints ( $OP^{DTT}$ ,  $OP^{AA}$  and  $OP^{GSH}$ ) (Gao et al., 2020). Therefore, we have modified our introduction accordingly on lines 63 – 73, “Many of these acellular endpoints have been widely implemented by various researchers for assessing the oxidative properties of PM. Calas et al. (2018) compared the responses of several OP endpoints [i.e.  $OP^{DTT}$ ,  $OP^{AA}$ ,  $OP^{GSH}$ , and electron spin resonance ( $OP^{ESR}$ )] on PM<sub>10</sub> samples (N = 98) collected from Chamonix (France). Yang et al. (2014) also used four OP endpoints [ $OP^{AA}$ ,  $OP^{DTT}$ ,  $OP^{ESR}$  and reductive acridinium triggering ( $OP^{CRAT}$ )] to investigate the effect of different extraction solvents and filter types on OP responses using the PM<sub>2.5</sub> samples (N = 20) collected from two cities (Rotterdam and Amsterdam) in Netherland. The comparison of  $OP^{AA}$ ,  $OP^{DTT}$  and  $OP^{GSH}$  has been shown in two studies (Fang et al., 2016; Gao et al., 2020), both from the southeast US. We are not aware of any study which has compared ·OH generation in SLF or DTT with other*

endpoints based on antioxidants consumption (e.g. AA or GSH consumption). Clearly, the studies systematically comparing the responses of these different endpoints on a large sample-set collected from an extensive spatial scale, particularly in the United States are very limited.”

We also have included several studies from this list in our manuscript at several appropriate places, e.g. lines 82 – 89 in the introduction, and lines 325 – 327 in the results and discussion section. Table S6 of the manuscript (i.e. Table S2 in the preprint), where we compare our OP levels with other measurements is also updated by including those studies from this list that used the same extraction protocols (i.e. water and methanol extractions as used in our study) and measured OP on PM<sub>2.5</sub> samples. Inclusion of these studies has enriched our discussion.

## References

- Abrams, J. Y., Weber, R. J., Klein, M., Samat, S. E., Chang, H. H., Strickland, M. J., Verma, V., Fang, T., Bates, J. T., and Mulholland, J. A.: Associations between ambient fine particulate oxidative potential and cardiorespiratory emergency department visits, *Environmental Health Perspectives*, 125, 107008, 10.1289/ehp1545, 2017.
- Apeageyi, E., Bank, M. S., and Spengler, J. D.: Distribution of heavy metals in road dust along an urban-rural gradient in Massachusetts, *Atmospheric Environment*, 45, 2310-2323, <https://doi.org/10.1016/j.atmosenv.2010.11.015>, 2011.
- Ayres, J. G., Borm, P., Cassee, F. R., Castranova, V., Donaldson, K., Ghio, A., Harrison, R. M., Hider, R., Kelly, F., and Kooter, I. M.: Evaluating the toxicity of airborne particulate matter and nanoparticles by measuring oxidative stress potential—a workshop report and consensus statement, *Inhalation Toxicology*, 20, 75-99, 10.1080/08958370701665517, 2008.
- Bates, J. T., Weber, R. J., Abrams, J., Verma, V., Fang, T., Klein, M., Strickland, M. J., Sarnat, S. E., Chang, H. H., and Mulholland, J. A.: Reactive oxygen species generation linked to sources of atmospheric particulate matter and cardiorespiratory effects, *Environmental Science & Technology*, 49, 13605-13612, 10.1021/acs.est.5b02967, 2015.
- Baumann, K., Jayanty, R., and Flanagan, J. B.: Fine particulate matter source apportionment for the chemical speciation trends network site at Birmingham, Alabama, using positive matrix factorization, *Journal of the Air & Waste Management Association*, 58, 27-44, 2008.
- Borlaza, L. J. S., Weber, S., Jaffrezo, J.-L., Houdier, S., Slama, R., Rieux, C., Albinet, A., Micallef, S., Trébluchon, C., and Uzu, G.: Disparities in particulate matter (PM 10) origins and oxidative potential at a city scale (Grenoble, France)—Part 2: Sources of PM 10 oxidative potential using multiple linear regression analysis and the predictive applicability of multilayer perceptron neural network analysis, *Atmospheric Chemistry and Physics*, 21, 9719-9739, 2021.
- Buzcu-Guven, B., Brown, S. G., Frankel, A., Hafner, H. R., and Roberts, P. T.: Analysis and apportionment of organic carbon and fine particulate matter sources at multiple sites in the midwestern United States, *Journal of the Air & Waste Management Association*, 57, 606-619, 2007.
- Calas, A., Uzu, G., Kelly, F. J., Houdier, S., Martins, J. M., Thomas, F., Molton, F., Charron, A., Dunster, C., and Oliete, A.: Comparison between five acellular oxidative potential measurement assays performed with detailed chemistry on PM 10 samples from the city of Chamonix (France), *Atmospheric Chemistry and Physics*, 18, 7863-7875, 2018.
- Calas, A., Uzu, G., Besombes, J.-L., Martins, J. M., Redaelli, M., Weber, S., Charron, A., Albinet, A., Chevrier, F., and Brulfert, G.: Seasonal variations and chemical predictors of oxidative potential (OP) of particulate matter (PM), for seven urban French sites, *Atmosphere*, 10, 698, 2019.
- Cesari, D., Merico, E., Grasso, F. M., Decesari, S., Belosi, F., Manarini, F., De Nuntiis, P., Rinaldi, M., Volpi, F., and Gambaro, A.: Source apportionment of PM<sub>2.5</sub> and of its oxidative potential in an industrial suburban site in south Italy, *Atmosphere*, 10, 758, 2019.

Charrier, J., and Anastasio, C.: *On dithiothreitol (DTT) as a measure of oxidative potential for ambient particles: evidence for the importance of soluble transition metals*, *Atmospheric Chemistry and Physics*, 12, 11317-11350, 10.5194/acp-12-9321-2012, 2012.

Charrier, J., Richards-Henderson, N., Bein, K., McFall, A., Wexler, A., and Anastasio, C.: *Oxidant production from source-oriented particulate matter—Part 1: Oxidative potential using the dithiothreitol (DTT) assay*, *Atmospheric Chemistry and Physics*, 15, 2327-2340, 2015.

Charrier, J. G., and Anastasio, C.: *Rates of hydroxyl radical production from transition metals and quinones in a surrogate lung fluid*, *Environmental Science & Technology*, 49, 9317-9325, 10.1021/acs.est.5b01606, 2015.

Charrier, J. G., McFall, A. S., Vu, K. K., Baroi, J., Olea, C., Hasson, A., and Anastasio, C.: *A bias in the “mass-normalized” DTT response—An effect of non-linear concentration-response curves for copper and manganese*, *Atmospheric Environment*, 144, 325-334, 10.1016/j.atmosenv.2016.08.071, 2016.

Chen, Y., Takeuchi, M., Nah, T., Xu, L., Canagaratna, M. R., Stark, H., Baumann, K., Canonaco, F., Prévôt, A. S., and Huey, L. G.: *Chemical characterization of secondary organic aerosol at a rural site in the southeastern US: insights from simultaneous high-resolution time-of-flight aerosol mass spectrometer (HR-ToF-AMS) and FIGAERO chemical ionization mass spectrometer (CIMS) measurements*, *Atmospheric Chemistry and Physics*, 20, 8421-8440, 2020.

Cheung, K., Daher, N., Kam, W., Shafer, M. M., Ning, Z., Schauer, J. J., and Sioutas, C.: *Spatial and temporal variation of chemical composition and mass closure of ambient coarse particulate matter (PM<sub>10-2.5</sub>) in the Los Angeles area*, *Atmospheric Environment*, 45, 2651-2662, 2011.

Cho, A. K., Sioutas, C., Miguel, A. H., Kumagai, Y., Schmitz, D. A., Singh, M., Eiguren-Fernandez, A., and Froines, J. R.: *Redox activity of airborne particulate matter at different sites in the Los Angeles Basin*, *Environmental Research*, 99, 40-47, 10.1016/j.envres.2005.01.003, 2005.

Councell, T. B., Duckenfield, K. U., Landa, E. R., and Callender, E.: *Tire-wear particles as a source of zinc to the environment*, *Environmental science & technology*, 38, 4206-4214, 2004.

Daher, N., Hasheminassab, S., Shafer, M. M., Schauer, J. J., and Sioutas, C.: *Seasonal and spatial variability in chemical composition and mass closure of ambient ultrafine particles in the megacity of Los Angeles*, *Environmental Science: Processes & Impacts*, 15, 283-295, 2013.

Dou, J., Lin, P., Kuang, B.-Y., and Yu, J. Z.: *Reactive oxygen species production mediated by humic-like substances in atmospheric aerosols: Enhancement effects by pyridine, imidazole, and their derivatives*, *Environmental science & technology*, 49, 6457-6465, 2015.

Fang, T., Verma, V., Guo, H., King, L., Edgerton, E., and Weber, R.: *A semi-automated system for quantifying the oxidative potential of ambient particles in aqueous extracts using the dithiothreitol (DTT) assay: results from the Southeastern Center for Air Pollution and Epidemiology (SCAPE)*, *Atmospheric Measurement Techniques Discussions*, 7, 10.5194/amt-8-471-2015, 2014.

Fang, T., Verma, V., Bates, J. T., Abrams, J., Klein, M., Strickland, M. J., Sarnat, S. E., Chang, H. H., Mulholland, J. A., and Tolbert, P. E.: *Oxidative potential of ambient water-soluble PM<sub>2.5</sub> in the southeastern United States: contrasts in sources and health associations between ascorbic acid (AA) and dithiothreitol (DTT) assays*, *Atmospheric Chemistry and Physics*, 16, 3865-3879, 10.5194/acp-16-3865-2016, 2016.

Feinberg, S. N., Williams, R., Hagler, G., Low, J., Smith, L., Brown, R., Garver, D., Davis, M., Morton, M., and Schaefer, J.: *Examining spatiotemporal variability of urban particulate matter and application of high-time resolution data from a network of low-cost air pollution sensors*, *Atmospheric environment*, 213, 579-584, 2019.

Gaetke, L. M., and Chow, C. K.: *Copper toxicity, oxidative stress, and antioxidant nutrients*, *Toxicology*, 189, 147-163, 2003.

Gao, D., Fang, T., Verma, V., Zeng, L., and Weber, R. J.: *A method for measuring total aerosol oxidative potential (OP) with the dithiothreitol (DTT) assay and comparisons between an urban and roadside site of water-soluble and total OP*, *Atmospheric Measurement Techniques*, 10, 2821, 2017.

Gao, D., Godri Pollitt, K. J., Mulholland, J. A., Russell, A. G., and Weber, R. J.: *Characterization and comparison of PM 2.5 oxidative potential assessed by two acellular assays*, *Atmospheric Chemistry and Physics*, 20, 5197-5210, 2020.

Garg, B. D., Cadle, S. H., Mulawa, P. A., Groblicki, P. J., Laroo, C., and Parr, G. A.: *Brake Wear Particulate Matter Emissions*, *Environmental Science & Technology*, 34, 4463-4469, 10.1021/es001108h, 2000.

Gietl, J. K., Lawrence, R., Thorpe, A. J., and Harrison, R. M.: *Identification of brake wear particles and derivation of a quantitative tracer for brake dust at a major road*, *Atmospheric Environment*, 44, 141-146, 2010.

Godri, K. J., Duggan, S. T., Fuller, G. W., Baker, T., Green, D., Kelly, F. J., and Mudway, I. S.: *Particulate Matter Oxidative Potential from Waste Transfer Station Activity*, *Environmental Health Perspectives*, 118, 493-498, 10.1289/ehp.0901303, 2010.

Godri, K. J., Harrison, R. M., Evans, T., Baker, T., Dunster, C., Mudway, I. S., and Kelly, F. J.: *Increased oxidative burden associated with traffic component of ambient particulate matter at roadside and urban background schools sites in London*, *PloS One*, 6, e21961, 10.1371/journal.pone.0021961, 2011.

Gonzalez, D. H., Cala, C. K., Peng, Q., and Paulson, S. E.: *HULIS enhancement of hydroxyl radical formation from Fe (II): kinetics of fulvic acid-Fe (II) complexes in the presence of lung antioxidants*, *Environmental Science & Technology*, 51, 7676-7685, 2017.

Hammond, D. M., Dvonch, J. T., Keeler, G. J., Parker, E. A., Kamal, A. S., Barres, J. A., Yip, F. Y., and Brakefield-Caldwell, W.: *Sources of ambient fine particulate matter at two community sites in Detroit, Michigan*, *Atmospheric Environment*, 42, 720-732, 2008.

He, L., Norris, C., Cui, X., Li, Z., Barkjohn, K. K., Brehmer, C., Teng, Y., Fang, L., Lin, L., Wang, Q., Zhou, X., Hong, J., Li, F., Zhang, Y., Schauer, J. J., Black, M., Bergin, M. H., and Zhang, J. J.: *Personal Exposure to PM<sub>2.5</sub> Oxidative Potential in Association with Pulmonary Pathophysiologic Outcomes in Children with Asthma*, *Environmental Science & Technology*, 55, 3101-3111, 10.1021/acs.est.0c06114, 2021.

Huang, F., Li, X., Wang, C., Xu, Q., Wang, W., Luo, Y., Tao, L., Gao, Q., Guo, J., and Chen, S.: *PM<sub>2.5</sub> spatiotemporal variations and the relationship with meteorological factors during 2013-2014 in Beijing, China*, *PloS one*, 10, e0141642, 2015.

Hulskotte, J., Denier van der Gon, H., Visschedijk, A., and Schaap, M.: *Brake wear from vehicles as an important source of diffuse copper pollution*, *Water Science & Technology*, 56, 223-231, 10.2166/wst.2007.456, 2007.

Janssen, N. A., Yang, A., Strak, M., Steenhof, M., Hellack, B., Gerlofs-Nijland, M. E., Kuhlbusch, T., Kelly, F., Harrison, R., and Brunekreef, B.: *Oxidative potential of particulate matter collected at sites with different source characteristics*, *Science of the Total Environment*, 472, 572-581, 10.1016/j.scitotenv.2013.11.099, 2014.

Janssen, N. A., Strak, M., Yang, A., Hellack, B., Kelly, F. J., Kuhlbusch, T. A., Harrison, R. M., Brunekreef, B., Cassee, F. R., and Steenhof, M.: *Associations between three specific a-cellular measures of the oxidative potential of particulate matter and markers of acute airway and nasal inflammation in healthy volunteers*, *Occupational & Environmental Medicine*, 72, 49-56, 10.1136/oemed-2014-102303, 2015.

Jeong, C.-H., Traub, A., Huang, A., Hilker, N., Wang, J. M., Herod, D., Dabek-Zlotorzynska, E., Celoz, V., and Evans, G. J.: *Long-term analysis of PM<sub>2.5</sub> from 2004 to 2017 in Toronto: Composition, sources, and oxidative potential*, *Environmental Pollution*, 263, 114652, 2020.

Künzli, N., Mudway, I. S., Götschi, T., Shi, T., Kelly, F. J., Cook, S., Burney, P., Forsberg, B., Gauderman, J. W., and Hazenkamp, M. E.: *Comparison of oxidative properties, light absorbance, and total and elemental mass concentration of ambient PM<sub>2.5</sub> collected at 20 European sites*, *Environmental Health Perspectives*, 114, 684-690, 10.1289/ehp.8584, 2006.

Kim, E., Hopke, P. K., Pinto, J. P., and Wilson, W. E.: *Spatial Variability of Fine Particle Mass, Components, and Source Contributions during the Regional Air Pollution Study in St. Louis*, *Environmental Science & Technology*, 39, 4172-4179, 10.1021/es049824x, 2005.

Kumagai, Y., Koide, S., Taguchi, K., Endo, A., Nakai, Y., Yoshikawa, T., and Shimojo, N.: Oxidation of proximal protein sulfhydryls by phenanthraquinone, a component of diesel exhaust particles, *Chemical Research in Toxicology*, 15, 483-489, 2002.

Kundu, S., and Stone, E. A.: Composition and sources of fine particulate matter across urban and rural sites in the Midwestern United States, *Environmental Science: Processes & Impacts*, 16, 1360-1370, 2014.

Lee, J. H., and Hopke, P. K.: Apportioning sources of PM<sub>2.5</sub> in St. Louis, MO using speciation trends network data, *Atmospheric Environment*, 40, 360-377, 2006.

Lin, M., and Yu, J. Z.: Assessment of interactions between transition metals and atmospheric organics: ascorbic acid depletion and hydroxyl radical formation in organic-metal mixtures, *Environmental Science & Technology*, 54, 1431-1442, 10.1021/acs.est.9b07478, 2020.

Lin, M., and Yu, J. Z.: Assessment of oxidative potential by hydrophilic and hydrophobic fractions of water-soluble PM<sub>2.5</sub> and their mixture effects, *Environmental Pollution*, 275, 116616, <https://doi.org/10.1016/j.envpol.2021.116616>, 2021.

Lin, P., Bluvshtein, N., Rudich, Y., Nizkorodov, S. A., Laskin, J., and Laskin, A.: Molecular Chemistry of Atmospheric Brown Carbon Inferred from a Nationwide Biomass Burning Event, *Environmental Science & Technology*, 51, 11561-11570, 10.1021/acs.est.7b02276, 2017.

Lin, P., Fleming, L. T., Nizkorodov, S. A., Laskin, J., and Laskin, A.: Comprehensive Molecular Characterization of Atmospheric Brown Carbon by High Resolution Mass Spectrometry with Electrospray and Atmospheric Pressure Photoionization, *Analytical chemistry*, 90, 12493-12502, 2018.

Liu, Q., Baumgartner, J., Zhang, Y., Liu, Y., Sun, Y., and Zhang, M.: Oxidative potential and inflammatory impacts of source apportioned ambient air pollution in Beijing, *Environmental Science & Technology*, 48, 12920-12929, 2014.

Liu, W., Xu, Y., Liu, W., Liu, Q., Yu, S., Liu, Y., Wang, X., and Tao, S.: Oxidative potential of ambient PM<sub>2.5</sub> in the coastal cities of the Bohai Sea, northern China: Seasonal variation and source apportionment, *Environmental Pollution*, 236, 514-528, 2018.

Luo, Y., Zhou, X., Zhang, J., Xiao, Y., Wang, Z., Zhou, Y., and Wang, W.: PM<sub>2.5</sub> pollution in a petrochemical industry city of northern China: Seasonal variation and source apportionment, *Atmospheric Research*, 212, 285-295, <https://doi.org/10.1016/j.atmosres.2018.05.029>, 2018.

Maikawa, C. L., Weichenthal, S., Wheeler, A. J., Dobbin, N. A., Smargiassi, A., Evans, G., Liu, L., Goldberg, M. S., and Pollitt, K. J. G.: Particulate Oxidative Burden as a Predictor of Exhaled Nitric Oxide in Children with Asthma, *Environmental Health Perspectives*, 124, 1616, 10.1289/ehp175, 2016.

Massoud, R., Shihadeh, A. L., Roumié, M., Youness, M., Gerard, J., Saliba, N., Zaarour, R., Abboud, M., Farah, W., and Saliba, N. A.: Intraurban variability of PM<sub>10</sub> and PM<sub>2.5</sub> in an Eastern Mediterranean city, *Atmospheric Research*, 101, 893-901, 2011.

Milando, C., Huang, L., and Batterman, S.: Trends in PM<sub>2.5</sub> emissions, concentrations and apportionments in Detroit and Chicago, *Atmospheric Environment*, 129, 197-209, 2016.

Moreno, T., Kelly, F. J., Dunster, C., Oliete, A., Martins, V., Reche, C., Minguillón, M. C., Amato, F., Capdevila, M., and de Miguel, E.: Oxidative potential of subway PM<sub>2.5</sub>, *Atmospheric Environment*, 148, 230-238, 2017.

Mukherjee, A., Brown, S. G., McCarthy, M. C., Pavlovic, N. R., Stanton, L. G., Snyder, J. L., D'Andrea, S., and Hafner, H. R.: Measuring spatial and temporal PM<sub>2.5</sub> variations in Sacramento, California, communities using a network of low-cost sensors, *Sensors*, 19, 4701, 2019.

Paraskevopoulou, D., Bougiatioti, A., Stavroulas, I., Fang, T., Lianou, M., Liakakou, E., Gerasopoulos, E., Weber, R., Nenes, A., and Mihalopoulos, N.: Yearlong variability of oxidative potential of particulate matter in an urban Mediterranean environment, *Atmospheric Environment*, 206, 183-196, 2019.

Perrone, M. R., Bertoli, I., Romano, S., Russo, M., Rispoli, G., and Pietrogrande, M. C.: PM<sub>2.5</sub> and PM<sub>10</sub> oxidative potential at a Central Mediterranean Site: Contrasts between dithiothreitol- and ascorbic acid-measured values in relation with particle size and chemical composition, *Atmospheric Environment*, 210, 143-155, 2019.

Pietrogrande, M. C., Perrone, M. R., Manarini, F., Romano, S., Udusti, R., and Becagli, S.: PM10 oxidative potential at a Central Mediterranean Site: Association with chemical composition and meteorological parameters, *Atmospheric Environment*, 188, 97-111, 2018.

Pietrogrande, M. C., Bertoli, I., Manarini, F., and Russo, M.: Ascorbate assay as a measure of oxidative potential for ambient particles: Evidence for the importance of cell-free surrogate lung fluid composition, *Atmospheric Environment*, 211, 103-112, 10.1016/j.atmosenv.2019.05.012, 2019.

Puthussery, J. V., Zhang, C., and Verma, V.: Development and field testing of an online instrument for measuring the real-time oxidative potential of ambient particulate matter based on dithiothreitol assay, *Atmospheric Measurement Techniques*, 11, 5767-5780, 10.5194/amt-11-5767-2018, 2018.

Reff, A., Bhave, P. V., Simon, H., Pace, T. G., Pouliot, G. A., Mobley, J. D., and Houyoux, M.: Emissions inventory of PM<sub>2.5</sub> trace elements across the United States, *Environmental science & technology*, 43, 5790-5796, 2009.

Riva, M., Budisulistiorini, S. H., Chen, Y., Zhang, Z., D'Ambro, E. L., Zhang, X., Gold, A., Turpin, B. J., Thornton, J. A., Canagaratna, M. R., and Surratt, J. D.: Chemical Characterization of Secondary Organic Aerosol from Oxidation of Isoprene Hydroxyhydroperoxides, *Environmental Science & Technology*, 50, 9889-9899, 10.1021/acs.est.6b02511, 2016.

Saffari, A., Daher, N., Shafer, M. M., Schauer, J. J., and Sioutas, C.: Seasonal and spatial variation in reactive oxygen species activity of quasi-ultrafine particles (PM<sub>0.25</sub>) in the Los Angeles metropolitan area and its association with chemical composition, *Atmospheric Environment*, 79, 566-575, 2013.

Saffari, A., Daher, N., Shafer, M. M., Schauer, J. J., and Sioutas, C.: Seasonal and spatial variation in dithiothreitol (DTT) activity of quasi-ultrafine particles in the Los Angeles Basin and its association with chemical species, *Journal of Environmental Science and Health, Part A*, 49, 441-451, 10.1080/10934529.2014.854677, 2014.

Strak, M., Janssen, N., Beelen, R., Schmitz, O., Vaartjes, I., Karssenberg, D., van den Brink, C., Bots, M. L., Dijst, M., and Brunekreef, B.: Long-term exposure to particulate matter, NO<sub>2</sub> and the oxidative potential of particulates and diabetes prevalence in a large national health survey, *Environment international*, 108, 228-236, 2017.

Szigeti, T., Dunster, C., Cattaneo, A., Cavallo, D., Spinazzè, A., Saraga, D. E., Sakellaris, I. A., de Kluizenaar, Y., Cornelissen, E. J., and Hänninen, O.: Oxidative potential and chemical composition of PM<sub>2.5</sub> in office buildings across Europe—The OFFICAIR study, *Environment International*, 92, 324-333, 10.1016/j.envint.2016.04.015, 2016.

Tao, J., Zhang, L., Cao, J., Zhong, L., Chen, D., Yang, Y., Chen, D., Chen, L., Zhang, Z., and Wu, Y.: Source apportionment of PM<sub>2.5</sub> at urban and suburban areas of the Pearl River Delta region, south China—with emphasis on ship emissions, *Science of the Total Environment*, 574, 1559-1570, 2017.

Verma, V., Pakbin, P., Cheung, K. L., Cho, A. K., Schauer, J. J., Shafer, M. M., Kleinman, M. T., and Sioutas, C.: Physicochemical and oxidative characteristics of semi-volatile components of quasi-ultrafine particles in an urban atmosphere, *Atmospheric environment*, 45, 1025-1033, 2011.

Verma, V., Fang, T., Guo, H., King, L., Bates, J., Peltier, R., Edgerton, E., Russell, A., and Weber, R.: Reactive oxygen species associated with water-soluble PM<sub>2.5</sub> in the southeastern United States: spatiotemporal trends and source apportionment, *Atmospheric Chemistry and Physics*, 14, 12915-12930, 2014.

Verma, V., Fang, T., Xu, L., Peltier, R. E., Russell, A. G., Ng, N. L., and Weber, R. J.: Organic aerosols associated with the generation of reactive oxygen species (ROS) by water-soluble PM<sub>2.5</sub>, *Environmental Science & Technology*, 49, 4646-4656, 10.1021/es505577w, 2015.

Visentin, M., Pagnoni, A., Sarti, E., and Pietrogrande, M. C.: Urban PM<sub>2.5</sub> oxidative potential: Importance of chemical species and comparison of two spectrophotometric cell-free assays, *Environmental Pollution*, 219, 72-79, 10.1016/j.envpol.2016.09.047, 2016.

Wang, Y., Plewa, M. J., Mukherjee, U. K., and Verma, V.: Assessing the cytotoxicity of ambient particulate matter (PM) using Chinese hamster ovary (CHO) cells and its relationship with the PM chemical composition and oxidative potential, *Atmospheric Environment*, 179, 132-141, 10.1016/j.atmosenv.2018.02.025, 2018.

Wang, Y., Puthussery, J. V., Yu, H., and Verma, V.: Synergistic and antagonistic interactions among organic and metallic components of the ambient particulate matter (PM) for the cytotoxicity measured by Chinese hamster ovary cells, *Science of The Total Environment*, 139511, 2020.

Weber, S., Uzu, G., Calas, A., Chevrier, F., Besombes, J.-L., Charron, A., Salameh, D., Ježek, I., Močnik, G., and Jaffrezo, J.-L.: An apportionment method for the oxidative potential of atmospheric particulate matter sources: application to a one-year study in Chamonix, France, *Atmospheric Chemistry and Physics*, 18, 9617-9629, 2018.

Weber, S., Uzu, G., Favez, O., Borlaza, L. J., Calas, A., Salameh, D., Chevrier, F., Allard, J., Besombes, J.-L., and Albinet, A.: Source apportionment of atmospheric PM 10 Oxidative Potential: synthesis of 15 year-round urban datasets in France, *Atmospheric Chemistry and Physics Discussions*, 1-38, 2021.

Wei, J., Yu, H., Wang, Y., and Verma, V.: Complexation of iron and copper in ambient particulate matter and its effect on the oxidative potential measured in a surrogate lung fluid, *Environmental Science & Technology*, 53, 1661-1671, 2018.

Weichenthal, S., Lavigne, E., Evans, G., Pollitt, K., and Burnett, R. T.: Ambient PM<sub>2.5</sub> and risk of emergency room visits for myocardial infarction: impact of regional PM<sub>2.5</sub> oxidative potential: a case-crossover study, *Environmental Health*, 15, 46, 10.1186/s12940-016-0129-9, 2016a.

Weichenthal, S., Shekarzifard, M., Traub, A., Kulka, R., Al-Rijleh, K., Anowar, S., Evans, G., and Hatzopoulou, M.: Within-city spatial variations in multiple measures of PM<sub>2.5</sub> oxidative potential in Toronto, Canada, *Environmental Science & Technology*, 53, 2799-2810, 2019.

Weichenthal, S. A., Lavigne, E., Evans, G. J., Godri Pollitt, K. J., and Burnett, R. T.: Fine particulate matter and emergency room visits for respiratory illness. Effect modification by oxidative potential, *American Journal of Respiratory and Critical Care Medicine*, 194, 577-586, 2016b.

Xiong, Q., Yu, H., Wang, R., Wei, J., and Verma, V.: Rethinking the dithiothreitol-based particulate matter oxidative potential: measuring dithiothreitol consumption versus reactive oxygen species generation, *Environmental Science & Technology*, 51, 6507-6514, 10.1021/acs.est.7b01272, 2017.

Yang, A., Jedynska, A., Hellack, B., Kooter, I., Hoek, G., Brunekreef, B., Kuhlbusch, T. A., Cassee, F. R., and Janssen, N. A.: Measurement of the oxidative potential of PM<sub>2.5</sub> and its constituents: The effect of extraction solvent and filter type, *Atmospheric Environment*, 83, 35-42, 10.1016/j.atmosenv.2013.10.049, 2014.

Yang, A., Hellack, B., Leseman, D., Brunekreef, B., Kuhlbusch, T. A., Cassee, F. R., Hoek, G., and Janssen, N. A.: Temporal and spatial variation of the metal-related oxidative potential of PM<sub>2.5</sub> and its relation to PM<sub>2.5</sub> mass and elemental composition, *Atmospheric Environment*, 102, 62-69, 2015a.

Yang, A., Wang, M., Eeftens, M., Beelen, R., Dons, E., Leseman, D. L., Brunekreef, B., Cassee, F. R., Janssen, N. A., and Hoek, G.: Spatial variation and land use regression modeling of the oxidative potential of fine particles, *Environmental Health Perspectives*, 123, 1187-1192, 2015b.

Yang, A., Janssen, N. A., Brunekreef, B., Cassee, F. R., Hoek, G., and Gehring, U.: Children's respiratory health and oxidative potential of PM<sub>2.5</sub>: the PIAMA birth cohort study, *Occupational & Environmental Medicine*, 73, 154-160, 10.1136/oemed-2015-103175, 2016.

Yu, H., Wei, J., Cheng, Y., Subedi, K., and Verma, V.: Synergistic and antagonistic interactions among the particulate matter components in generating reactive oxygen species based on the dithiothreitol assay, *Environmental Science & Technology*, 52, 2261-2270, 10.1021/acs.est.7b04261, 2018.

Yu, H., Puthussery, J. V., and Verma, V.: A semi-automated multi-endpoint reactive oxygen species activity analyzer (SAMERA) for measuring the oxidative potential of ambient PM<sub>2.5</sub> aqueous extracts, *Aerosol Science and Technology*, 54, 304-320, 2020.

Yu, S., Liu, W., Xu, Y., Yi, K., Zhou, M., Tao, S., and Liu, W.: Characteristics and oxidative potential of atmospheric PM<sub>2.5</sub> in Beijing: Source apportionment and seasonal variation, *Science of the Total Environment*, 650, 277-287, 2019.

Zhang, X., Staimer, N., Tjoa, T., Gillen, D. L., Schauer, J. J., Shafer, M. M., Hasheminassab, S., Pakbin, P., Longhurst, J., and Sioutas, C.: Associations between microvascular function and short-term exposure to traffic-related air pollution and particulate matter oxidative potential, *Environmental health*, 15, 1-16, 2016.

Zhang, Y., Schauer, J. J., Shafer, M. M., Hannigan, M. P., and Dutton, S. J.: Source apportionment of in vitro reactive oxygen species bioassay activity from atmospheric particulate matter, *Environmental Science & Technology*, 42, 7502-7509, 10.1021/es800126y, 2008.



# Appendix: Revised manuscript in track mode

## Spatiotemporal Variability in the Oxidative Potential of Ambient Fine Particulate Matter in Midwestern United States

Haoran Yu<sup>1</sup>, Joseph Varghese Puthussery<sup>1</sup>, Yixiang Wang<sup>1</sup>, Vishal Verma<sup>1\*</sup>

<sup>1</sup>Department of Civil and Environmental Engineering, University of Illinois at Urbana-Champaign, Urbana, IL, 61801, United States

\* Correspondence to: Vishal Verma (vverma@illinois.edu)

**Abstract.** We assessed the oxidative potential (OP) of both water-soluble and methanol-soluble fractions of ambient fine particulate matter (PM<sub>2.5</sub>) in the midwestern United States. A large set of PM<sub>2.5</sub> samples (N = 241) were collected from five sites, setup in different environments, i.e. urban, rural and roadside, in Illinois, Indiana and Missouri during May 2018 – May 2019. Five acellular OP endpoints, including the consumption rate of ascorbic acid and glutathione in a surrogate lung fluid (SLF) (OP<sup>AA</sup> and OP<sup>GSH</sup>, respectively), dithiothreitol (DTT) depletion rate (OP<sup>DTT</sup>), and ·OH generation rate in SLF and DTT (OP<sup>OH-SLF</sup> and OP<sup>OH-DTT</sup>, respectively), were measured for all PM<sub>2.5</sub> samples. PM<sub>2.5</sub> mass concentrations in the Midwest US as obtained from these samples were spatially homogeneously distributed, while most OP endpoints showed significant spatiotemporal heterogeneity. Seasonally, higher activities occurred in summer for most OP endpoints for both water- and methanol-soluble extracts. Spatially, roadside site showed highest activities for most OP endpoints in the water-soluble extracts, while only occasional peaks were observed at urban sites in the methanol-soluble OP. Most OP endpoints showed similar spatiotemporal trends between mass- and volume-normalized activities across different sites and seasons. Comparisons between two solvents (i.e. water and methanol) showed that methanol-soluble OP generally had higher activity levels than corresponding water-soluble OP. Site-to-site comparisons of OP showed stronger correlations for methanol-soluble OP compared to water-soluble OP, indicating a better extraction of water-insoluble redox-active compounds from various emission sources into methanol. We found a weak correlation and inconsistent slope values between PM<sub>2.5</sub> mass and most OP endpoints. Moreover, the poor-to-moderate intercorrelations among different OP endpoints infer different mechanisms of OP represented by these endpoints, and thus demonstrate the rationale for analyzing multiple acellular endpoints for a better and comprehensive assessment of OP.

### 1 Introduction

Oxidative stress induced by ambient fine particulate matter (PM<sub>2.5</sub>; particulate matter with size less than 2.5 μm) has been widely recognized as a biological pathway for fine particles to exert adverse health effect in humans (Sørensen et al., 2003; Risom et al., 2005; Garçon et al., 2006; Wessels et al., 2010; Cachon et al., 2014; Haberzettl et al., 2016; Feng et al., 2016; Rao et al., 2018; Mudway et al., 2020). A variety of chemical species in ambient particles, such as transition metals and aromatic organic species, possess redox cycling capability and can catalyze electron transfer from cellular

33 reductants (e.g. NADPH) to molecular oxygen ( $O_2$ ), which subsequently forms highly reactive radicals [e.g.  
34 superoxide radical ( $\cdot O_2^-$ ) and hydroxyl radical ( $\cdot OH$ )] and non-radical oxidants [e.g. hydrogen peroxide ( $H_2O_2$ )]  
35 (Kampfrath et al., 2011; Qin et al., 2018; Kumagai et al., 2002; Lee et al., 2016). These oxygen containing species with  
36 high redox activity and short lifetime are collectively defined as the reactive oxygen species (ROS). Several  
37 antioxidants (e.g. ascorbic acid (AA), reduced glutathione (GSH) and uric acid (UA) etc.) that are present in human  
38 respiratory tract lining fluid (RTLFL) can counteract the ROS under normal conditions by donating extra electrons, thus  
39 forming less-oxidative species and oxidized antioxidants (Kelly, 2003; Li and Nel, 2006; Allan et al., 2010; Zuo et al.,  
40 2013; Poljšak and Fink, 2014). However, excessively produced ROS might penetrate the antioxidant barrier and induce  
41 oxidative stress (Xing et al., 2016; Rao et al., 2018), leading to the cascade of detrimental biological effects such as  
42 oxidation of DNA, lipids and proteins (Rossner et al., 2008; Franco et al., 2008; Grevendonk et al., 2016), tissue injury  
43 (Feng et al., 2016; Gurgueira et al., 2002; Sun et al., 2020) and eventually cardiopulmonary impairment (Li et al.,  
44 2018; Kodavanti et al., 2000; Kampfrath et al., 2011). The capability of particulate matter (PM) for catalyzing the  
45 generation of ROS and/or the depletion of antioxidants is defined as the oxidative potential (OP) of PM (Bates et al.,  
46 2019).

47 The assessment of  $PM_{2.5}$ -induced oxidative stress is conventionally carried out through biological tests, including both  
48 *in vitro* (Becker et al., 2005; Zhang et al., 2008; Oh et al., 2011; Yan et al., 2016; Abbas et al., 2016; Deng et al., 2013)  
49 and *in vivo* designs (Kleinman et al., 2005; Riva et al., 2011; Pei et al., 2016; Araujo et al., 2008; Xu et al., 2011; Sancini  
50 et al., 2014). Although, these biological tests are highly relevant in terms of representing the health effects in humans,  
51 the time- and labor-intensive protocols as well as the cost of experimental materials generally limit their application  
52 to only small sample sizes. Various acellular chemical assays which assess the OP by replicating intrinsic biological  
53 mechanisms were therefore developed as alternatives. These assays are generally divided in two categories. The OP  
54 analysis approaches in the 1<sup>st</sup> category directly probe the generation of ROS during redox cycling reactions in presence  
55 of PM, such as the measurement of  $H_2O_2$  and  $\cdot OH$  production in surrogate lung fluid (SLF) (Vidrio et al., 2009; Shen  
56 et al., 2011; Charrier et al., 2014; Ma et al., 2015), and  $H_2O_2$  and  $\cdot OH$  production in dithiothreitol (DTT) (Yu et al.,  
57 2018; Xiong et al., 2017; Chung et al., 2006; Kumagai et al., 2002). The assays in 2<sup>nd</sup> category utilize the consumption  
58 of antioxidants such as AA (Visentin et al., 2016; Weichenthal et al., 2016b) and GSH (Künzli et al., 2006; Szigeti et  
59 al., 2016), or surrogates of cellular reductants such as DTT (Verma et al., 2014; Cho et al., 2005), as the OP indicator.  
60 Analyzing each PM sample for all of these chemical assays is also time-consuming. To address this concern, we have  
61 previously developed an automated OP analysis instrument named SAMERA – Semi-Automated Multi-Endpoint  
62 ROS-activity Analyzer, which can measure five most commonly used OP endpoints (i.e. consumption rate of AA and  
63 GSH in SLF,  $OP^{AA}$  and  $OP^{GSH}$  respectively; consumption rate of DTT,  $OP^{DTT}$ , and generation rate of  $\cdot OH$  in SLF and  
64 DTT,  $OP^{OH-SLF}$  and  $OP^{OH-DTT}$ ) for a PM extract in less than 3 hours (Yu et al., 2020). These Many of these acellular  
65 endpoints have been widely implemented by various researchers for assessing the oxidative properties of  $PM_{2.5}$ . Calas  
66 et al. (2018) compared the responses of several OP endpoints [i.e.  $OP^{DTT}$ ,  $OP^{AA}$ ,  $OP^{GSH}$ , and electron spin resonance  
67 ( $OP^{ESR}$ )] on  $PM_{10}$  samples (N = 98) collected from Chamonix (France). Yang et al. (2014) also used four OP endpoints  
68 [ $OP^{AA}$ ,  $OP^{DTT}$ ,  $OP^{ESR}$  and reductive acridinium triggering ( $OP^{CRAT}$ )] to investigate the effect of different extraction  
69 solvents and filter types on OP responses using the  $PM_{2.5}$  samples (N = 20) collected from two cities (Rotterdam and

70 Amsterdam) in Netherland. The comparison of  $OP^{AA}$ ,  $OP^{DTT}$  and  $OP^{GSH}$  has been shown in two studies (Fang et al.,  
71 2016;Gao et al., 2020a), both from the southeast US. We are not aware of any study which has compared ·OH  
72 generation in SLF or DTT with other endpoints based on antioxidants consumption (e.g. AA or GSH consumption).  
73 Clearly, the studies systematically comparing the responses of these different endpoints on a large sample-set collected  
74 from an extensive spatial scale, particularly in the United States are very limited. However, there has not been a single  
75 study which has systematically compared the responses of all of these chemical assays in a single investigation.

76 Although OP is proposed as an integrative  $PM_{2.5}$  property, purportedly combining the individual and synergistic  
77 actions of its many active components, there have been limited attempts to integrate it in the large-scale  
78 epidemiological studies. This is because, unlike other PM properties such as mass, sulfate, nitrate etc., the OP  
79 measurements in different geographical regions have been relatively sparse. Moreover, before integrating OP in the  
80 epidemiological studies, it is important that we investigate the differences of its spatiotemporal distribution with other  
81 commonly measured PM properties such as mass. An understanding of the temporal variation of OP in a specific  
82 environment could be helpful in time series studies of short-term effects, while the spatial variation of OP can aid in  
83 studying the long-term health effects of  $PM_{2.5}$  exposure among different regions (Yang et al., 2015a). Globally, the  
84 spatiotemporal profiles of OP have been characterized for some geographical regions such as Los Angeles Basin  
85 (Saffari et al., 2014, 2013), Denver (Zhang et al., 2008), Atlanta (Fang et al., 2016;Verma et al., 2014) in US, Ontario  
86 (Canada) (Jeong et al., 2020;Weichenthal et al., 2019;Weichenthal et al., 2016a), France (Borlaza et al., 2021;Calas  
87 et al., 2019;Weber et al., 2018;Weber et al., 2021), Italy (Cesari et al., 2019;Perrone et al., 2019;Pietrogrande et al.,  
88 2018), Athens in Greece (Paraskevopoulou et al., 2019), Netherland (Yang et al., 2015a;Yang et al., 2015b), and some  
89 coastal cities of Bohai [Jinzhou, Tianjin and Yantai (Liu et al., 2018)] and Beijing (Yu et al., 2019;Liu et al., 2014) in  
90 China. Some of these studies have substantially contributed in enhancing our understanding of the role of OP in the  
91 PM-induced health effects (Fang et al., 2016;Tuet et al., 2016;Abrams et al., 2017;Weichenthal et al., 2016a;Yang et  
92 al., 2016;Bates et al., 2015). However, despite including many cities ranked high in terms of the air pollution [e.g.  
93 Indianapolis (Rosenthal et al., 2008), Chicago (Dominici et al., 2003), St. Louis (Sarnat et al., 2015), Detroit (Zhou et  
94 al., 2011), Cincinnati (Kaufman et al., 2019), and Cleveland (Kumar et al., 2013)], the midwestern region of the United  
95 States is an understudied region in terms of assessing the oxidative levels of ambient  $PM_{2.5}$ .

96 Here, we investigate the detailed spatiotemporal profiles of ambient  $PM_{2.5}$  mass concentrations and OP in the  
97 midwestern United States. Simultaneous ambient  $PM_{2.5}$  samples were collected from five different sites in the Midwest  
98 US. The automated instrument – SAMERA facilitated the measurement of OP on our large bulk of  $PM_{2.5}$  samples (N  
99 = 241) collected from all the sites, which were extracted in both water and methanol separately. ~~This paper mainly~~  
100 ~~discusses the spatiotemporal distribution of the mass concentration and OP of  $PM_{2.5}$  measured by five different~~  
101 ~~endpoints in the Midwest US. The goal of this analysis is to compare the spatiotemporal distribution of  $PM_{2.5}$  OP with~~  
102 ~~that of the mass concentrations. We also want to investigate if different measures of OP, i.e.  $OP^{AA}$ ,  $OP^{GSH}$ ,  $OP^{OH-SLF}$ ,~~  
103  ~~$OP^{DTT}$  and  $OP^{OH-DTT}$  show different spatiotemporal trends or are correlated with each other.~~ Correlations of OP with  
104 PM chemical composition and source apportionment analysis of  $PM_{2.5}$  OP will be presented in our subsequent

105 publications. Our paper presents the results from probably one of the most comprehensive OP analysis campaigns,  
106 combining five different acellular OP endpoints measured on both water- and organic-soluble extracts.

## 107 **2 Experimental methods**

### 108 2.1 Sampling campaign

109 Simultaneous sampling in five different sites spread across three states (i.e. Illinois, Indiana and Missouri) was  
110 conducted every week for this project in the Midwest US. The locations of the sampling sites are shown in Figure 1.  
111 Champaign (CMP) and Bondville (BON) sites are paired sites representing the urban (roadside) and rural environment  
112 of Champaign County, IL, respectively; while three major city sites [i.e. Chicago (CHI), Indianapolis (IND) and St.  
113 Louis (STL)] are representatives of urban background regions of ~~Chicago, Indianapolis and St. Louis,~~  
114 respectively these respective cities.

115 CMP is located on a parking garage in the campus of University of Illinois at Urbana-Champaign, and is adjacent to  
116 a 2-lane (both ways) road (i.e. University Avenue). This site is surrounded by the university facilities and is impacted  
117 by traffic emissions from adjacent road. The site is about 1 km from downtown Champaign and is surrounded by  
118 dense housing and business development.

119 BON is a rural site, 15 km west of downtown Champaign, and is also a part of the IMPROVE (Interagency Monitoring  
120 of Protected Visual Environments) monitoring program. The station is managed by the Illinois State Water Survey,  
121 and is surrounded by intensively managed agricultural fields. The major highways (I-57 and I-74) are at least 6 km  
122 north and east of this site, respectively.

123 CHI site is located on a dormitory building – Carman hall in Illinois Institute of Technology (IIT) campus, Chicago,  
124 IL. This site is ~500 m away from a two-way 6-lane (including an emergency lane) interstate highway I-90/94, 1.5  
125 km west of Lake Michigan and 5 km south of downtown Chicago. The highway I-90/94 has an annual average daily  
126 traffic flow of 300,000 vehicles per day, and heavy-duty vehicles account for ~10% in the traffic fleet (Xiang et al.,  
127 2019). The site is situated in the mixed commercial and residential area of Chicago, and therefore the emissions from  
128 both traffic mixed with residential and commercial activities are expected.

129 IND site is located inside the campus of School of Public Health, Indiana University – Purdue University Indianapolis  
130 (IUPUI). This site is close to downtown Indianapolis (2 km southeast of IND site) and a two-way 4-lane interstate  
131 highway I-65 (1 km northeast of IND site). The site is surrounded by miscellaneous facilities of IUPUI and Riley  
132 Hospital, therefore the sources of ambient aerosols at IND site may include vehicular emissions from highway, and  
133 emissions from residential and commercial activities related to miscellaneous university and hospital operations.

134 STL site is located 3 km north of downtown St. Louis, MO. This site is 230 m west of the interstate I-44/70 and 1.2  
135 km west of Mississippi River. It is also surrounded by several industries for steel processing, zinc smelting and copper  
136 production (Lee et al., 2006). Therefore, a significant portion of metals in PM at this site is supposed to be from

137 industrial emissions. The urban activities in downtown St. Louis as well as traffic emissions from highway vehicles  
138 and river boating are also potential sources of PM<sub>2.5</sub> at this site.

139 The sampling period involved four seasons starting from May 22, 2018 to May 30, 2019. Integrated ambient PM<sub>2.5</sub>  
140 samples were collected simultaneously for three continuous days from all the sites. Each site was instrumented with  
141 a High-volume (Hi-Vol) air sampler equipped with PM<sub>2.5</sub> inlet (flow rate = 1.13 m<sup>3</sup>/min; Tisch Environmental; Cleves,  
142 OH). Both before and after the sampling campaign, we did a comparison of various samplers by running them in  
143 parallel to collect PM<sub>2.5</sub> samples and analyzing them for OP<sup>DTT</sup> (see Section S1 of the supplemental information, SI).  
144 All the samplers were equipped with a timer to enable automatic start of the sampling on each Tuesday 0:00, and turn-  
145 off on each Friday 0:00. After the sampled filters were collected on Friday (before noon), new filters were loaded in  
146 the filter holder to start next run of sampling. All five samplers were monthly calibrated for the flow rate by using a  
147 variable flow calibration kit (Tisch Environmental), and the flow rate was measured every week before and after the  
148 sampling. We used quartz filters (Pall Tissuquartz<sup>TM</sup>, 8"×10") for collecting PM<sub>2.5</sub>. The filters were prebaked at  
149 550 °C for 24 hours before sampling. Total 241 filters were collected during the whole campaign (44 from CHI, 47  
150 from STL, 54 from IND, 51 from CMP and 45 from BON). We also collected field blank filters (N = 10 from each  
151 site) once in every five weeks by placing a blank quartz filter in filter holder of the sampler for 1 hour but without  
152 running the pump.

153 All filters were weighed before and after sampling using a lab-scale digital balance (0.2 mg readability, Sartorius  
154 A120S, Göttingen, Germany) for determining the PM<sub>2.5</sub> mass loading on each filter. Prior to each weighing, filters  
155 were equilibrated in a constant temperature (24 °C) and relative humidity (50 %) room for 24 hours. After sampling,  
156 the filters were individually wrapped in prebaked (550 °C) aluminum foils and stored in a freezer at -20 °C before  
157 analysis. More information on sampling including the exact dates of sampling are provided in Table S1 in the  
158 supplemental information (SI).

## 159 2.2 Sample extraction protocol

160 Sample extraction protocol for OP analysis was determined by the requirement to keep a relatively constant  
161 concentration of PM<sub>2.5</sub> in the liquid extracts. This is due to non-linear response of certain OP endpoints with PM<sub>2.5</sub>  
162 mass in the extracts (Charrier et al., 2016). Thus, fraction of the filter and the volume of water used for extraction  
163 were varied depending on the PM<sub>2.5</sub> mass loading on each Hi-Vol filter. For the analyses of water-soluble OP, a few  
164 (usually 3-5) circular sections (16-25 mm diameter) were punched from the filter and immersed into 15-20 mL of  
165 deionized Milli-Q water (DI, resistivity = 18.2 MΩ/cm). The volume of water was adjusted to achieve ~100 µg of  
166 total PM<sub>2.5</sub> per mL of DI. The vials containing filter sections suspended in the DI were sonicated in an ultrasonic water  
167 bath for 1 hour (Cole-Palmer, Vernon-Hills, IL, US). These suspensions were then filtered through a 0.45 µm PTFE  
168 syringe filter to remove all water-insoluble components including filter fibers. 10.5 mL of these filtered extracts were  
169 separated and diluted with DI to 15 mL. These diluted extracts were then kept in the sample queue of SAMERA for  
170 OP analyses. SAMERA withdraws different volume of these extracts into the reaction vials (RVs) for each OP  
171 measurement, i.e. 3.5 mL for OP<sup>AA</sup>, OP<sup>GSH</sup> and OP<sup>OH-SLF</sup>, and 2.1 mL for OP<sup>DTT</sup> and OP<sup>OH-DTT</sup> measurements, all of

172 which were further diluted to 5 mL in the RVs. Thus, the concentrations of PM<sub>2.5</sub> in RVs for SLF-based (i.e. OP<sup>AA</sup>,  
173 OP<sup>GSH</sup> and OP<sup>OH-SLF</sup>) and DTT-based (i.e. OP<sup>DTT</sup> and OP<sup>OH-DTT</sup>) assays were maintained constant at 50 µg/mL and 30  
174 µg/mL (±1%), respectively.

175 For methanol-soluble OP measurements, another fraction from each filter having the same area as used for the water-  
176 soluble PM<sub>2.5</sub> extraction was punched and extracted in 10 mL of methanol. After sonication for 1 hour, the suspensions  
177 were filtered through 0.45 µm PTFE syringe filter. The filtered extracts were then concentrated to less than 50 µL  
178 using a nitrogen dryer to evaporate methanol, and were subsequently reconstituted ~~into 15-20 mL of DI~~ to the exact  
179 same volume as the water-soluble extracts. Reconstituted methanol extracts were vigorously shaken on an analog  
180 vortex mixer (VWR International, Batavia, IL, US) for at least 60 seconds at 3200 rpm to ensure a thorough flushing  
181 of the components probably deposited along the wall of the vials during evaporation. These methanol-soluble extracts  
182 were then analyzed for OP in the same way as water-soluble extracts.

### 183 2.3 OP analysis

184 OP activities of PM<sub>2.5</sub> extracts were analyzed using SAMERA. The setup and operation protocol of SAMERA has  
185 been discussed in detail in Yu et al. (2020). Briefly, the analysis of all OP endpoints for each extract was conducted  
186 in two stages: SLF-based endpoints were analyzed first, while DTT-based assays were conducted in the second stage.  
187 For measuring OP<sup>AA</sup> and OP<sup>GSH</sup>, 3.5 mL of the extract was mixed with 0.5 mL SLF and 1 mL of 0.5 M potassium  
188 phosphate buffer (K-PB) in an RV. SLF was made following the protocol of Yu et al. (2020), i.e. by mixing equal  
189 volumes (1 mL each) of four antioxidant stock solutions – 20 mM AA, 10 mM GSH, 30 mM citric acid (CA) and 10  
190 mM UA, and diluting the mixture by DI to 10 mL. Final concentrations of the antioxidants in the RV used for  
191 incubating the sample, were 200 µM AA, 100 µM GSH, 300 µM CA and 100 µM UA. At certain time intervals (i.e.  
192 5, 24, 43, 62 and 81 minutes), two small aliquots of the reaction mixture were withdrawn and dispensed into two  
193 measurement vials (MV1 and MV2) separately. The mixture in MV1 was diluted by DI, and was directly injected into  
194 a liquid waveguide capillary cell (LWCC-3100; World Precision Instruments, Inc., Sarasota, FL, USA) coupled to an  
195 online spectrophotometer (Ocean Optics, Inc., Dunedin, FL, USA), which measured the absorbance at 265 nm (signal  
196 from AA) and 600 nm (background) for determining the concentration of AA. 1.6 mL of o-phthalaldehyde (OPA) was  
197 added into the reaction mixture contained in MV2 to react with GSH, which forms a fluorescent product. The final  
198 mixture in MV2 was then pushed through a flow cell equipped in a Horiba Fluoromax-4 spectrofluorometer (Horiba  
199 Scientific, Edison, NJ, USA), and the fluorescence was measured at excitation/emission wavelength of 310 nm/427  
200 nm. Simultaneously with the preparation of the reaction mixture for OP<sup>AA</sup> and OP<sup>GSH</sup> analyses, 3.5 mL of the extract  
201 was mixed with 0.5 mL SLF and 1 mL of 50 mM K-PB buffered disodium terephthalate (TPT) (pH = 7.4) in another  
202 RV2. TPT captures ·OH generated in the reaction and forms another fluorescent product 2-hydroxyterephthalic acid  
203 (2-OHTA). Small aliquots of this reaction mixture were withdrawn into MV2 at selected time intervals (10, 29, 48,  
204 67 and 86 minutes), diluted by DI, and injected into the flow cell of the spectrofluorometer for measuring fluorescence  
205 at the same wavelengths as used for GSH measurement (i.e. 310 nm excitation/427 nm emission). The concentration  
206 of 2-OHTA was determined by calibrating various concentrations (10-500 nM) of 2-OHTA standards, and the

207 generation rate of  $\cdot\text{OH}$  was determined as the formation rate of 2-OHTA divided by a yield factor (0.35) (Son et al.,  
208 2015).

209 Both RVs and MVs were flushed with DI after all SLF-based endpoints were analyzed, and DTT-based assays started  
210 immediately after this cleaning. Similar to the first step of SLF assay, 2.1 mL of the diluted  $\text{PM}_{2.5}$  extract was mixed  
211 with 1 mL of 50 mM TPT, 1.4 mL of DI and 0.5 mL of 1 mM DTT in an RV. At certain time intervals (i.e. 5 min, 17  
212 min, 29 min, 41 min and 53 min), two small aliquots of this reaction mixture were withdrawn and diluted with DI in  
213 MV1 and MV2 separately for the measurement of DTT and  $\cdot\text{OH}$ , respectively. DTNB was added into MV1 to capture  
214 residual DTT. The final mixture in MV1 was pushed through LWCC to measure the absorbance at 412 nm, while the  
215 mixture in MV2 was pushed through flow cell of the spectrofluorometer for fluorescence measurement (310 nm  
216 excitation/427 nm emission), respectively. The system was again cleaned by flushing DI to RVs, MVs, LWCC and  
217 flow cell of the spectrofluorometer for the next run. Once in a week, we conducted thorough cleaning of the entire  
218 system, by replacing all chemicals and samples first with methanol followed by DI, and running the program script  
219 10 times with each solvent.

## 220 2.4 Quality Control/Quality Assurance

221 One field blank filter extract along with a DI blank were used as the negative controls for each set of  $\text{PM}_{2.5}$  samples  
222 analyzed in a batch (usually  $\sim 10$ ). Selected metals and organic compounds that are known to be sensitive for different  
223 OP endpoints, i.e. Cu(II) for  $\text{OP}^{\text{AA}}$  and  $\text{OP}^{\text{GSH}}$ , Fe(II) for  $\text{OP}^{\text{OH-SLF}}$ , phenanthraquinone (PQ) for  $\text{OP}^{\text{DTT}}$  and 5-hydroxy-  
224 1,4-naphthoquinone (5-H-1,4-NQ) for  $\text{OP}^{\text{OH-DTT}}$ , were used as the positive control, and were analyzed weekly with  
225  $\text{PM}_{2.5}$  samples to ensure the stability of SAMERA and correct for any possible drift.

226 The average and standard deviation of OP of negative and positive controls are shown in Table 1. Our previous study  
227 on the development of SAMERA (Yu et al., 2020) reported the values of OP for negative controls, as  $0.17 \pm 0.07$   
228  $\mu\text{M}/\text{min}$  for  $\text{OP}^{\text{AA}}$ ,  $0.37 \pm 0.06 \mu\text{M}/\text{min}$  for  $\text{OP}^{\text{GSH}}$ ,  $4.57 \pm 1.21 \text{ nM}/\text{min}$  for  $\text{OP}^{\text{OH-SLF}}$ ,  $0.65 \pm 0.02 \mu\text{M}/\text{min}$  for  $\text{OP}^{\text{DTT}}$   
229 and  $-0.38 \pm 0.24 \mu\text{M}/\text{min}$  for  $\text{OP}^{\text{OH-DTT}}$ , which are consistent with the values reported in Table 1. The precision of  
230 SAMERA was assessed previously using water-soluble extracts and the coefficient of variations (CoVs) were reported  
231 to be less than 14 % (7.9 – 13.3 %) for all OP endpoints (Yu et al., 2020). We also assessed the precision using  
232 methanol-soluble extracts and found similar levels of CoVs, i.e. 8.9 -14.5 % for all OP endpoints (see Table S2 in SI).  
233 Consistency of our current results for negative controls with those reported earlier, and ~~a the low coefficient of~~  
234 ~~variation (CoVs)~~ obtained for the positive controls (1.1 – 11.8%) and  $\text{PM}_{2.5}$  extracts ensured a good quality assurance  
235 for the overall OP analysis. We blank corrected all OP values of ambient samples by subtracting the averaged field  
236 blank measurements. After blank correction, the OP values below detection limit were replaced with half of the  
237 detection limits for the corresponding OP endpoint. The mass-normalized (intrinsic, OPm) and volume-normalized  
238 (extrinsic, OPv) OP levels were obtained by dividing the blank corrected OP activities by the extracted  $\text{PM}_{2.5}$  mass  
239 (for OPm) and by the volume of air collected on the extracted fractions of filters (for OPv), respectively. The detailed  
240 calculations of OPm and OPv have been previously described in Yu et al. (2020).

241 2.5 Statistical analysis

242 To assess spatiotemporal variability in both OP and PM<sub>2.5</sub> mass, we compared their differences among all sites and  
243 seasons using one-way analysis of variance (ANOVA) test, and different pairs (i.e. pairs of different sites or seasons)  
244 were compared by Fisher’s least significant difference (LSD) post-hoc test. The significant and highly significant  
245 differences were considered by one-way ANOVA when P < 0.05 and P < 0.01, respectively. Pearson’s correlation  
246 coefficient (r) for single linear regression was computed to determine the correlation of OP between different sites,  
247 between water-soluble and methanol-soluble OP, between OP and PM<sub>2.5</sub>, as well as the intercorrelation among  
248 different endpoints for each site. ~~All PM<sub>2.5</sub> samples were assessed for spatiotemporal variability. However, since since~~  
249 several OP endpoints (e.g. OP<sup>AA</sup>, OP<sup>GSH</sup> and OP<sup>DTT</sup>) were abnormally elevated in the week of July 4<sup>th</sup> (Independence  
250 Day celebration; discussed in section 3.2), we removed this week’s sample from our regression analysis to avoid any  
251 bias caused by this episodic event. Site-to-site comparisons were performed by calculating the coefficient of  
252 divergence (COD) of mass concentration and volume-normalized OP (i.e. OP<sub>v</sub>) for all site pairs, as follows:

253 
$$CoD = \sqrt{\frac{1}{N} \sum_{i=1}^N \left( \frac{c_{ij} - c_{ik}}{c_{ij} + c_{ik}} \right)^2}$$

254 where: c<sub>ij</sub> and c<sub>ik</sub> are the PM<sub>2.5</sub> mass or OP<sub>v</sub> measured in the same week *i* at sites *j* and *k*, respectively; N is the number  
255 of the comparable sample pairs for sites *j* and *k*. COD ranges from 0 to 1. A larger COD (closer to 1) indicates more  
256 spatial heterogeneity between the sites, while a smaller COD (closer to 0) implies spatial homogeneity. One-way  
257 ANOVA test was conducted in Matlab R2019a, while other statistical analyses were carried out using Excel.

258 **3 Results and Discussion**

259 3.1 PM<sub>2.5</sub> mass concentration

260 Figure 2 shows the time series of three-days averaged PM<sub>2.5</sub> mass concentration at five sampling sites, while the  
261 seasonal averages are shown in Table 2. The mass concentrations ranged from 2.0 to 21.7 µg/m<sup>3</sup> across all sites, and  
262 the median was 11.0 µg/m<sup>3</sup>. These results are comparable with ~~previous studies on the typical ranges of~~ PM<sub>2.5</sub> in  
263 Midwest US cities (~~2.1 – 48.6 µg/m<sup>3</sup>~~), e.g. St. Louis (~~3.9 – 48.6 µg/m<sup>3</sup>~~) (Lee et al., 2006), Chicago (~~median 9.4 – 10.7~~  
264 ~~µg/m<sup>3</sup>~~) (Milando et al., 2016), Detroit (~~0.6 – 56.2 µg/m<sup>3</sup>, median 14.4 – 17.6 µg/m<sup>3</sup>~~) (Gildemeister et al., 2007),  
265 Bondville (~~2.1 – 36.5 µg/m<sup>3</sup>, median 9.5 µg/m<sup>3</sup>~~) and selected cities in Iowa (e.g. Cedar Rapids, Des Moines and  
266 Davenport) (~~8.4 – 11.6 µg/m<sup>3</sup>~~) (Kundu and Stone, 2014), ~~as measured in several previous studies~~. Generally, the more  
267 urbanized sites of our study (i.e. CHI, STL and IND) showed slightly higher mass concentrations (5.7 – 21.7 µg/m<sup>3</sup>;  
268 ~~median: 11.8 µg/m<sup>3</sup>~~) compared to the smaller cities like CMP and its rural component (i.e. BON) (2.0 – 20.2 µg/m<sup>3</sup>;  
269 ~~median: 9.2 µg/m<sup>3</sup>~~). The highest mass concentrations were recorded at CHI (~~during winter (P < 0.01; Table S3)~~ and  
270 STL (~~during summer (P < 0.05)~~), while BON exhibited the lowest concentrations in all seasons, except fall when the  
271 mass concentrations were lowest at CMP (~~P < 0.05~~). Other than these minor variations, the PM<sub>2.5</sub> mass concentrations



272 are both spatially and temporally homogeneous in the Midwest US with no significant seasonal differences ( $P > 0.05$   
273 at most sites).

### 274 3.2 Time series ~~Spatiotemporal variation in~~ $PM_{2.5}$ OP

275 Time series of both mass- and volume-normalized OP (OP<sub>m</sub> and OP<sub>v</sub>, respectively) at all the sites are shown in Figure  
276 3 (water-soluble OP) and Figure 4 (methanol-soluble OP). Seasonally averaged OP<sub>m</sub> and OP<sub>v</sub> of water-soluble and  
277 methanol-soluble  $PM_{2.5}$  are also shown in Figures 5 and 6, respectively. Differences in both OP<sub>m</sub> and OP<sub>v</sub> among  
278 different seasons or sites were determined by one-way ANOVA and the results are listed in SI, Table S4 (water-  
279 soluble OP) and Table S5 (methanol-soluble OP). Generally, OP ~~for both water and methanol-soluble extracts~~ showed  
280 much more spatiotemporal variability than the  $PM_{2.5}$  mass in the Midwest US.

#### 281 Water-soluble $PM_{2.5}$ OP

282 ~~The~~ Figures 3 and 5 (time series and seasonal averages of water-soluble OP) showed a significant spatial variability  
283 for SLF-based endpoints, particularly (i.e. OP<sup>AA</sup>, and OP<sup>GSH</sup>, and OP<sup>OH-SLF</sup>) in comparison to DTT-based OP (i.e.  
284 OP<sup>DTT</sup> and OP<sup>OH-DTT</sup>) in for both mass- and volume-normalized results (Figure 3a-e). Highest OP<sup>AA</sup> and OP<sup>GSH</sup>  
285 activities (both mass- and volume-normalized) occurred at the roadside site CMP (as confirmed by 1-way ANOVA  
286 test;  $P < 0.01$ ) in most seasons (except winter for OP<sup>AA</sup><sub>v</sub>), while STL and IND had the lowest OP<sup>AA</sup> and OP<sup>GSH</sup>. OP<sup>OH-</sup>  
287 SLF was more spatially uniformly distributed than OP<sup>AA</sup> and OP<sup>GSH</sup>; significantly higher OP<sup>OH-SLF</sup><sub>m</sub> and OP<sup>OH-SLF</sup><sub>v</sub>  
288 were observed at CMP only in summer and spring ( $P < 0.05$ ). For the DTT-based endpoints, OP<sup>DTT</sup><sub>v</sub> was only  
289 marginally higher at CHI in winter, and at CMP in summer and spring. Other than that, no significant differences were  
290 observed for OP<sup>DTT</sup><sub>v</sub> among various sites. The spatially uniform pattern for OP<sup>DTT</sup><sub>v</sub> is consistent with Verma et al.  
291 (2014) which found limited spatial variation for OP<sup>DTT</sup><sub>v</sub> in the Southeast US. In contrast, there was a significant  
292 variation in the OP<sup>DTT</sup><sub>m</sub> with elevated levels at CMP ( $P < 0.01$ ) in all seasons. Interestingly, the OP<sup>OH-DTT</sup> endpoint  
293 showed more spatial variability and was generally lowest at CMP ( $P < 0.05$ ) – the site which showed highest levels  
294 for all other OP endpoints. It implies that although OP<sup>DTT</sup> and OP<sup>OH-DTT</sup> endpoints are measured in the same DTT  
295 assay, different chemical components play differential roles in these endpoints. We found very similar spatial patterns  
296 of mass- and volume-normalized OP activities for most endpoints, again indicating only a marginal role of  $PM_{2.5}$  mass  
297 concentrations in causing the spatial variability in OP levels.

298 ~~Differences in both OP<sub>m</sub> and OP<sub>v</sub> among different seasons or sites were determined by one-way ANOVA and the~~  
299 ~~results are listed in SI, Table S4.~~ Seasonally, highest OP activities were generally observed in summer, while the  
300 lowest activities usually occurred in winter (Figure 5). ~~For example, OP<sup>AA</sup><sub>v</sub> and OP<sup>GSH</sup><sub>v</sub> activities had highest levels~~  
301 ~~in summer and lowest levels in winter at CMP and BON, as verified by 1-way ANOVA ( $P < 0.05$ ). Similarly,~~  
302 ~~significantly higher OP activities ( $P < 0.01$  for most cases) were observed for both OP<sup>OH-SLF</sup><sub>m</sub> and OP<sup>OH-SLF</sup><sub>v</sub> at all~~  
303 ~~five sites in summer, while winter showed significantly lower levels ( $P < 0.05$ ). For DTT-based endpoints, OP<sup>OH-DTT</sup><sub>m</sub>~~  
304 ~~and OP<sup>OH-DTT</sup><sub>v</sub> also showed higher values in summer at CHI, IND and CMP ( $P < 0.01$ ). However, OP<sup>DTT</sup> exhibited~~  
305 ~~limited temporal variation at most sites with only slightly higher OP<sup>DTT</sup><sub>m</sub> and OP<sup>DTT</sup><sub>v</sub> observed in summer at BON ( $P$~~   
306  ~~$< 0.05$ ).~~ An exception to this trend was OP<sup>DTT</sup>, which exhibited limited temporal variation at most sites with only

307 ~~slightly higher OP<sup>DTT</sup> observed in summer at BON (P < 0.05).~~ The temporal ~~variation trend~~ uniformity of OP<sup>DTT</sup> in  
308 this study does not correspond with previous studies conducted in Southwest and Southeast US. For the Southeast US,  
309 Verma et al. (2014) found significantly higher OP<sup>DTT</sup><sub>v</sub> in winter (December, 2012) compared to summer (June to  
310 August, 2012), and this difference was even more pronounced in mass-normalized OP. Saffari et al. (2014) also  
311 observed higher OP<sup>DTT</sup> activities of quasi-ultrafine particles (PM<sub>0.25</sub>) in fall and winter seasons for the Southwest US  
312 (Los Angeles Basin), and attributed this trend to the partitioning of redox-active semi-volatile organic compounds to  
313 particle phase in colder seasons. However, the trend of OP<sup>AA</sup> in our study is in agreement with another study in  
314 Southeast US ~~using OP<sup>AA</sup> as the endpoint~~ (Fang et al., 2016), which showed higher OP<sup>AA</sup> in warmer seasons (i.e.  
315 summer and fall) than winter. ~~There is no previous literature available on the spatiotemporal trends of other OP~~  
316 ~~endpoints in US, to which we can compare our results.~~ The seasonal trend of mass- and volume-normalized activities  
317 were nearly identical for all endpoints, again indicating a marginal effect of PM<sub>2.5</sub> mass concentration in the temporal  
318 variation of OP.

319 ~~CMP showed a substantially higher water-soluble OP than other sites for these endpoints. In the temporal trend, SLF-~~  
320 ~~based endpoints showed higher levels during summer compared to other seasons at most sites.~~ A significant temporal  
321 variation was observed for CMP with several spikes in the OP activities throughout the year, most prominently for  
322 OP<sup>AA</sup> (Figure 3). ~~These spikes might be attributed to the traffic, as CMP is the only site adjacent (< 10 m) to a major~~  
323 ~~urban road and located on the roof of a parking garage. One of our previous studies, Wang et al. (2018), reported large~~  
324 ~~variations in several redox-active metals (e.g. Cu, Fe, Mn, Pb and Zn), which have been known to be related with the~~  
325 ~~vehicular emissions~~ (Hulskotte et al., 2007; Garg et al., 2000; Gietl et al., 2010; Apeageyi et al., 2011; Councell et al.,  
326 2004), ~~at the same CMP site. Since SLF-based endpoints have been shown to be highly sensitive towards metals~~  
327 (Ayres et al., 2008; Calas et al., 2018; Fang et al., 2016; Moreno et al., 2017; Charrier and Anastasio, 2015; Wei et al.,  
328 2018), ~~the temporal variation in traffic intensity probably contributes to the spikes observed at CMP.~~ The peaks in the  
329 week of July 3 were observed for multiple endpoints (e.g. OP<sup>AA</sup>, OP<sup>GSH</sup> and OP<sup>DTT</sup>) at most sites, which is attributed  
330 to the emissions from firecrackers on Independence Day (July 4) celebrations (Yu et al., 2020; Puthussery et al., 2018).

### 331 Methanol-soluble PM<sub>2.5</sub> OP

332 ~~As observed in the time series, the spatiotemporal variations for the methanol-soluble OP endpoints (e.g. OP<sup>AA</sup>, OP<sup>GSH</sup>,~~  
333 ~~OP<sup>DTT</sup> and OP<sup>OH-DTT</sup>) seem to be lesser than the corresponding water-soluble OP (Figure 4a-b, d-e). However,~~  
334 ~~methanol-soluble OP<sup>OH-SLF</sup> showed a significant seasonal variability with substantially higher levels in summer at~~  
335 ~~most sites, and a marginal spatial variability with slightly higher activities at CHI during summer (Figure 4c).~~

336 ~~Seasonal averages of methanol-soluble PM<sub>2.5</sub>-OP<sub>m</sub> and OP<sub>v</sub> are shown in Figure 6. Compared to water-soluble OP,~~  
337 ~~most OP endpoints in the methanol-soluble extracts showed weaker seasonal variations (Figure 4 and 6), as also~~  
338 ~~indicated-confirmed~~ by relatively lower F-values [median of F = 1.61 (Table S5a), compared to 2.71 for the water-  
339 soluble OP endpoints (Table S4a)]. Similar to water-soluble OP, highest activities for the methanol-soluble OP were  
340 generally observed in summer (Figure 6). ~~For example, highest values of OP<sup>AA</sup> and OP<sup>DTT</sup> were observed in summer~~  
341 ~~at CMP and BON (P < 0.05) for both mass- and volume-normalized activities. OP<sup>OH-SLF</sup><sub>m</sub> and OP<sup>OH-SLF</sup><sub>v</sub> peaked in~~  
342 ~~summer at BON (P < 0.01), but in fall at IND (P < 0.05). OP<sup>OH-DTT</sup><sub>m</sub> and OP<sup>OH-DTT</sup><sub>v</sub> were also elevated in summer at~~

343 ~~CHI ( $P < 0.01$ ), but showed marginal seasonal variations at other sites. In contrast,  $OP^{GSH}$  showed a rather~~  
344 ~~homogeneous seasonal distribution at all sites, except slight elevation of  $OP^{GSH}_m$  in fall at STL and IND ( $P < 0.05$ ).~~  
345 The spatial variations in OP were also weaker for the methanol-soluble extracts in comparison to water-soluble  
346 extracts [median of  $F = 1.96$  (Table S5b), compared to 4.52 for the water-soluble OP endpoints (Table S4b)];].  
347 ~~h~~However, some ~~spikes significantly higher OP levels~~ were observed at certain sites in different seasons, ~~e.g.  $OP^{AA}_v$~~   
348 ~~at CHI in winter and spring,  $OP^{GSH}_v$  at CHI and CMP during winter and spring,  $OP^{GSH}_m$  at CMP in all seasons,  $OP^{OH-SLF}$~~   
349 ~~at CHI in summer and winter, and  $OP^{OH-DTT}_m$  and  $OP^{OH-DTT}_v$  at CHI in summer ( $P < 0.05$ ). Substantially higher~~  
350  ~~$OP^{AA}_v$  occurred at CHI ( $P < 0.05$ ) in winter and spring, while no significant differences were observed for  $OP^{AA}_m$~~   
351 ~~among different sites in any other season.  $OP^{GSH}_v$  was elevated at CHI and CMP during winter and spring ( $P < 0.05$ ),~~  
352 ~~while CMP showed elevated  $OP^{GSH}_m$  in all seasons ( $P < 0.05$ ). In summer and winter,  $OP^{OH-SLF}$  peaked at CHI ( $P <$~~   
353 ~~0.05) for both mass and volume normalized levels.  $OP^{OH-DTT}_m$  and  $OP^{OH-DTT}_v$  also peaked at CHI ( $P < 0.05$ ) in~~  
354 ~~summer. The lowest levels of  $OP^{OH-DTT}$  were again found at CMP in all seasons, which is consistent with the trend for~~  
355 ~~water soluble  $OP^{OH-DTT}$ . In contrast,  $OP^{DTT}$  showed spatially homogeneous distribution across all seasons, with~~  
356 ~~marginally elevated values of  $OP^{DTT}_v$  at STL during fall and winter ( $P < 0.05$ ). Other than these few cases, T~~  
357 the spatiotemporal trends were again ~~very largely~~ similar between mass- and volume-normalized methanol-soluble OP  
358 activities ~~except few cases discussed here.~~

### 359 Comparison of OP in the Midwest US with previous investigations

360 A comparison of the ranges of OP endpoints ~~observed measured~~ in our study ~~and with those reported in~~ previous  
361 ~~investigations studies is has been briefly~~ provided in SI (Table S62 (SI)). ~~The purpose of this comparison is to validate~~  
362 ~~our measurements and present a larger perspective on the general levels of OP in the Midwest US in comparison to~~  
363 ~~other regions of the world.~~ For water-soluble  $PM_{2.5}$  in our study,  $OP^{AA}_m$  ranged from 0.002 to 0.077  $nmol \cdot min^{-1} \cdot \mu g^{-1}$ ,  
364 which is within the ranges reported from previous studies conducted in Europe (Künzli et al., 2006; Szigeti et al.,  
365 2016; Godri et al., 2011; Perrone et al., 2019) and India (Mudway et al., 2005). ~~However, our~~Our range of  $OP^{AA}_v$   
366 (0.012 – 0.908  $nmol \cdot min^{-1} \cdot m^{-3}$ ) is ~~comparable with~~ Gao et al. (2020a) (0.023 – 0.126  $nmol \cdot min^{-1} \cdot m^{-3}$ ), but is much  
367 lower than that reported by Fang et al. (2016) (0.2 – 5.2  $nmol \cdot min^{-1} \cdot m^{-3}$ ) and Yang et al. (2014) (0.8 – 35.0  $nmol \cdot s^{-1} \cdot m^{-3}$ ),  
368 probably because of a different protocol used in ~~those their~~ studies, ~~both of~~ which involved only AA in the  
369 assay. The median of water-soluble  $OP^{GSH}_m$  (0.007  $nmol \cdot min^{-1} \cdot \mu g^{-1}$ ) is also comparable with the average of those  
370 reported (0.0041 – 0.0083  $nmol \cdot min^{-1} \cdot \mu g^{-1}$ ) in previous studies (Mudway et al., 2005; Künzli et al., 2006; Godri et al.,  
371 2011). Similarly, the median of  $OP^{OH-SLF}_m$  (0.142  $pmol \cdot min^{-1} \cdot \mu g^{-1}$ ) is comparable to the averages reported by Vidrio  
372 et al. (2009) (0.253  $pmol \cdot min^{-1} \cdot \mu g^{-1}$ ) and Ma et al. (2015) (0.092 – 0.253  $pmol \cdot min^{-1} \cdot \mu g^{-1}$ ). The median of  $OP^{DTT}_m$   
373 (0.014  $nmol \cdot min^{-1} \cdot \mu g^{-1}$ ) of our samples is significantly lower than the medians or averages reported from most studies  
374 conducted in US (0.019 – 0.041  $nmol \cdot min^{-1} \cdot \mu g^{-1}$ ) (Cho et al., 2005; Charrier and Anastasio, 2012; Gao et al., 2020b; Hu  
375 et al., 2008; Fang et al., 2015) and Greece (0.019 – 0.041  $nmol \cdot min^{-1} \cdot \mu g^{-1}$ ) (Paraskevopoulou et al., 2019), but is closer  
376 to the averages reported from the studies conducted in Italy (0.010 – 0.012  $nmol \cdot min^{-1} \cdot \mu g^{-1}$ ) (Cesari et al., 2019; Perrone  
377 et al., 2019). Similarly, the median of our  $OP^{DTT}_v$  (0.150  $nmol \cdot min^{-1} \cdot m^{-3}$ ) is lower compared to several studies in  
378 Southeast US and Europe (0.19 – 0.34–0.33  $nmol \cdot min^{-1} \cdot m^{-3}$ ) (Fang et al., 2015; Gao et al., 2017; Gao et al., 2020a; Gao

379 et al., 2020b;Paraskevopoulou et al., 2019;Perrone et al., 2019;Cesari et al., 2019), but closer to one study conducted  
380 in Southwest US ( $0.14 \text{ nmol}\cdot\text{min}^{-1}\cdot\text{m}^{-3}$ ) (Hu et al., 2008). The range of water-soluble  $\text{OP}^{\text{OH-DTT}}_{\text{v}}$  of our samples is quite  
381 large ( $0.004 - 3.565 \text{ pmol}\cdot\text{min}^{-1}\cdot\text{m}^{-3}$ ); however, there is no previous data to compare it, other than reported in the  
382 studies conducted by our own group (Xiong et al., 2017;Yu et al., 2018), which were based on a much smaller sample  
383 size ( $N = 10$ ) and limited spatial extent (single site) and thus resulting in ~~to~~ a much narrower range ( $0.2 - 1.1 \text{ pmol}\cdot\text{min}^{-1}\cdot\text{m}^{-3}$ ). Compared to water, only a handful of studies on PM-OP<sup>AA</sup> and OP<sup>DTT</sup> have used methanol as the PM extraction  
384 solvent, while no previous literatures ~~have investigated~~ is available on the OP of methanol-soluble PM for other  
385 endpoints. Similar to the water-soluble OP results, the level of methanol-soluble OP<sup>AA</sup><sub>v</sub> in our study ( $0.030 - 0.311$   
386  $\text{nmol}\cdot\text{min}^{-1}\cdot\text{m}^{-3}$ ) was lower than that reported by Yang et al. (2014) ( $2.2 - 43.5 \text{ nmol}\cdot\text{s}^{-1}\cdot\text{m}^{-3}$ ), probably due to different  
387 measurement protocols (only AA in comparison to SLF in our approach). The medians of our methanol-soluble  
388  $\text{OP}^{\text{DTT}}_{\text{m}}$  ( $0.021 \text{ nmol}\cdot\text{min}^{-1}\cdot\mu\text{g}^{-1}$ ) and  $\text{OP}^{\text{DTT}}_{\text{v}}$  ( $0.234 \text{ nmol}\cdot\text{min}^{-1}\cdot\text{m}^{-3}$ ) are slightly lower than the medians or averages  
389 reported in previous studies in the Southeast US ( $0.027 - 0.034 \text{ nmol}\cdot\text{min}^{-1}\cdot\mu\text{g}^{-1}$  and  $0.28 - 0.30 \text{ nmol}\cdot\text{min}^{-1}\cdot\text{m}^{-3}$ ,  
390 respectively for  $\text{OP}^{\text{DTT}}_{\text{m}}$  and  $\text{OP}^{\text{DTT}}_{\text{v}}$ ) (Verma et al., 2012;Gao et al., 2017;Gao et al., 2020b), which is consistent with  
391 the trend for water-soluble  $\text{OP}^{\text{DTT}}$  (i.e. lower levels of our samples than reported previously at other sites).  
392

### 393 3.3 Spatiotemporal variation in $\text{PM}_{2.5}$ -OP

#### 394 *Water-soluble $\text{PM}_{2.5}$ -OP*

395 ~~CMP showed a substantially higher water-soluble-OP than other sites for these endpoints. In the temporal trend, SLF-~~  
396 ~~based endpoints showed higher levels during summer compared to other seasons at most sites. A significant temporal~~  
397 ~~variation was observed for CMP with several spikes in the OP activities throughout the year, most prominently for~~  
398 ~~OP<sup>AA</sup>. The peak in the week of July 3 were observed for multiple endpoints (e.g. OP<sup>AA</sup>, OP<sup>GSH</sup> and OP<sup>DTT</sup>) at most~~  
399 ~~sites, which is attributed to the emissions from firecrackers on Independence Day (July 4) celebrations. In comparison~~  
400 ~~to SLF-based endpoints, mass- and volume-normalized DTT-based OP (i.e. OP<sup>DTT</sup> and OP<sup>OH-DTT</sup>) showed lesser~~  
401 ~~spatial variations (Figure 3d-e). Seasonally-averaged OP<sub>m</sub> and OP<sub>v</sub> of water-soluble  $\text{PM}_{2.5}$  at different sites are shown~~  
402 ~~in Figure 5. Differences in both OP<sub>m</sub> and OP<sub>v</sub> among different seasons or sites were determined by one-way ANOVA~~  
403 ~~and the results are listed in SI, Table S3. Seasonally, highest OP activities were generally observed in summer, while~~  
404 ~~the lowest activities usually occurred in winter. For example, OP<sup>AA</sup><sub>v</sub> and OP<sup>GSH</sup><sub>v</sub> activities had highest levels in~~  
405 ~~summer and lowest levels in winter at CMP and BON, as verified by 1-way ANOVA ( $P < 0.05$ ). Similarly,~~  
406 ~~significantly higher OP activities ( $P < 0.01$  for most cases) were observed for both OP<sup>OH-SLF</sup><sub>m</sub> and OP<sup>OH-SLF</sup><sub>v</sub> at all~~  
407 ~~five sites in summer, while winter showed significantly lower levels ( $P < 0.05$ ). For DTT-based endpoints, OP<sup>OH-DTT</sup><sub>m</sub>~~  
408 ~~and OP<sup>OH-DTT</sup><sub>v</sub> also showed higher values in summer at CHI, IND and CMP ( $P < 0.01$ ). However, OP<sup>DTT</sup> exhibited~~  
409 ~~limited temporal variation at most sites with only slightly higher OP<sup>DTT</sup><sub>m</sub> and OP<sup>DTT</sup><sub>v</sub> observed in summer at BON ( $P$~~   
410  ~~$< 0.05$ ). The seasonal trend of mass- and volume-normalized activities were nearly identical for all endpoints,~~  
411 ~~indicating a marginal effect of  $\text{PM}_{2.5}$  mass-concentration in the temporal variation of OP.~~

412 ~~The temporal variation trend of OP<sup>DTT</sup> in this study does not correspond with previous studies conducted in Southwest~~  
413 ~~and Southeast US. For the Southeast US, Verma et al. (2014) found significantly higher OP<sup>DTT</sup><sub>v</sub> in winter (December,~~

414 2012) compared to summer (June to August, 2012), and this difference was even more pronounced in mass-normalized  
415 OP. Saffari et al. (2014) also observed higher OP<sup>DTT</sup> activities of quasi-ultrafine particles (PM<sub>0.25</sub>) in fall and winter  
416 seasons for the Southwest US (Los Angeles Basin), and attributed this trend to the partitioning of redox-active semi-  
417 volatile organic compounds to particle phase in colder seasons. However, the trend of OP<sup>AA</sup> in our study is in  
418 agreement with another study in Southeast US using OP<sup>AA</sup> as the endpoint (Fang et al., 2016), which showed higher  
419 OP<sup>AA</sup> in warmer seasons (i.e. summer and fall) than winter. There is no previous literature available on the  
420 spatiotemporal trends of other OP endpoints in US, to which we can compare our results.

421 Spatially, there seems higher variability in the SLF-based endpoints, i.e. OP<sup>AA</sup> and OP<sup>GSH</sup> than the DTT-based  
422 endpoints (OP<sup>DTT</sup> and OP<sup>OH-DTT</sup>). Highest OP<sup>AA</sup> and OP<sup>GSH</sup> activities (both mass- and volume-normalized) occurred  
423 at the roadside site CMP (as confirmed by 1-way ANOVA test;  $P < 0.01$ ) in most seasons (except winter for OP<sup>AA</sup><sub>v</sub>),  
424 while STL and IND had the lowest OP<sup>AA</sup> and OP<sup>GSH</sup>. OP<sup>OH-SLF</sup> was more spatially uniformly distributed than OP<sup>AA</sup>  
425 and OP<sup>GSH</sup>; significantly higher OP<sup>OH-SLF</sup><sub>m</sub> and OP<sup>OH-SLF</sup><sub>v</sub> were observed at CMP only in summer and spring ( $P <$   
426  $0.05$ ). For the DTT-based endpoints, OP<sup>DTT</sup><sub>v</sub> was only marginally higher at CHI in winter, and at CMP in summer  
427 and spring. Other than that, no significant differences were observed for OP<sup>DTT</sup><sub>v</sub> among various sites. The spatially  
428 uniform pattern for OP<sup>DTT</sup><sub>v</sub> is consistent with Verma et al. (2014) which found limited spatial variation for OP<sup>DTT</sup><sub>v</sub> in  
429 the Southeast US. In contrast, there was significant variation in the OP<sup>DTT</sup><sub>m</sub> with elevated levels at CMP ( $P < 0.01$ ) in  
430 all seasons. Interestingly, the OP<sup>OH-DTT</sup> endpoint showed more spatial variability and was generally lowest at CMP ( $P$   
431  $< 0.05$ )—the site which showed highest levels for all other OP endpoints. It implies that although OP<sup>DTT</sup> and OP<sup>OH-</sup>  
432 <sup>DTT</sup> endpoints are measured in the same DTT assay, different chemical components play differential roles in these  
433 endpoints. We found very similar spatial patterns of mass- and volume-normalized OP activities for most endpoints,  
434 again indicating only a marginal role of PM<sub>2.5</sub> mass concentrations in causing the spatial variability in OP levels.

#### 435 *Methanol-soluble PM<sub>2.5</sub>-OP*

436 The spatiotemporal variations for the methanol-soluble OP endpoints (e.g. OP<sup>AA</sup>, OP<sup>GSH</sup>, OP<sup>DTT</sup> and OP<sup>OH-DTT</sup>) seem  
437 to be lesser than the corresponding water-soluble OP (Figure 4a, b, d, e). However, methanol-soluble OP<sup>OH-SLF</sup> showed  
438 a significant seasonal variability with substantially higher levels in summer at most sites, and a marginal spatial  
439 variability with slightly higher activities at CHI during summer (Figure 4c). Seasonal averages of methanol-soluble  
440 PM<sub>2.5</sub>-OP<sub>m</sub> and OP<sub>v</sub> are shown in Figure 6. Compared to water-soluble OP, most OP endpoints in the methanol-  
441 soluble extracts showed weaker seasonal variations, as also indicated by relatively lower F-values [median of  $F = 1.61$   
442 (Table S4a), compared to 2.71 for the water-soluble OP endpoints (Table S3a)]. Similar to water-soluble OP, highest  
443 activities for the methanol-soluble OP were generally observed in summer. For example, highest values of OP<sup>AA</sup> and  
444 OP<sup>DTT</sup> were observed in summer at CMP and BON ( $P < 0.05$ ) for both mass- and volume-normalized activities. OP<sup>OH-</sup>  
445 <sup>SLF</sup><sub>m</sub> and OP<sup>OH-SLF</sup><sub>v</sub> peaked in summer at BON ( $P < 0.01$ ), but in fall at IND ( $P < 0.05$ ). OP<sup>OH-DTT</sup><sub>m</sub> and OP<sup>OH-DTT</sup><sub>v</sub>  
446 were also elevated in summer at CHI ( $P < 0.01$ ), but showed marginal seasonal variations at other sites. In contrast,  
447 OP<sup>GSH</sup> showed a rather homogeneous seasonal distribution at all sites, except slight elevation of OP<sup>GSH</sup><sub>m</sub> in fall at  
448 STL and IND ( $P < 0.05$ ).

449 ~~The spatial variations in OP were also weaker for the methanol-soluble extracts in comparison to water-soluble~~  
450 ~~extracts [median of  $F = 1.96$  (Table S4b), compared to 4.52 for the water-soluble OP endpoints (Table S3b)]; however,~~  
451 ~~some spikes were observed at certain sites in different seasons. Substantially higher  $OP^{AA}_v$  occurred at CHI ( $P < 0.05$ )~~  
452 ~~in winter and spring, while no significant differences were observed for  $OP^{AA}_m$  among different sites in any other~~  
453 ~~season.  $OP^{GSH}_v$  was elevated at CHI and CMP during winter and spring ( $P < 0.05$ ), while CMP showed elevated~~  
454  ~~$OP^{GSH}_m$  in all seasons ( $P < 0.05$ ). In summer and winter,  $OP^{OH-SLF}_v$  peaked at CHI ( $P < 0.05$ ) for both mass- and~~  
455 ~~volume-normalized levels.  $OP^{OH-DTT}_m$  and  $OP^{OH-DTT}_v$  also peaked at CHI ( $P < 0.05$ ) in summer. The lowest levels of~~  
456  ~~$OP^{OH-DTT}_v$  were again found at CMP in all seasons, which is consistent with the trend for water-soluble  $OP^{OH-DTT}_v$ . In~~  
457 ~~contrast,  $OP^{DTT}_v$  showed spatially homogeneous distribution across all seasons, with marginally elevated values of~~  
458  ~~$OP^{DTT}_v$  at STL during fall and winter ( $P < 0.05$ ). The spatiotemporal trends were again very similar between mass-~~  
459 ~~and volume-normalized methanol-soluble OP activities except few cases discussed here.~~

### 460 3.4.3 Comparison of water-soluble and methanol-soluble OP

461 To assess the effect of solvent on the OP response, we computed the ratio of methanol-soluble OP<sub>v</sub> to water-soluble  
462 OP<sub>v</sub> ( $M/W^{OP}$ ) for all samples, and plotted it for the individual sites in Figure 7. As shown in the figure, methanol-  
463 soluble extracts generally showed greater response for most of the OP endpoints than the water-soluble extracts, with  
464 medians of  $M/W^{OP}$  being either close or greater than 1. The medians for  $M/W^{OP}$  for  $OP^{GSH}_v$  and  $OP^{DTT}_v$  were closer  
465 to 1 at many sites (~~0.6–1.3 for  $OP^{GSH}_v$ ; and 1.1–1.9 for  $OP^{DTT}_v$~~ ), while significantly greater than 1 for the other  
466 three endpoints ( $OP^{AA}_v$ ,  $OP^{OH-SLF}_v$  and  $OP^{OH-DTT}_v$ ). The only exception to this trend was for  $OP^{AA}_v$  at CMP, where  
467 significantly lower levels of methanol-soluble OP than water-soluble OP were observed (median of  $M/W^{OP} = 0.7$  for  
468  $OP^{AA}_v$  at CMP). Our previous studies analyzing the chemical composition of PM collected at CMP have shown an  
469 elevated level of Cu (up to 60 ng/m<sup>3</sup>) at this site (Wang et al., 2018; Puthussery et al., 2018), compared to the typical  
470 range (4–20 ng/m<sup>3</sup>) at most urban sites in US (Buzcu-Guven et al., 2007; Kundu and Stone, 2014; Lee and Hopke,  
471 2006; Hammond et al., 2008; Baumann et al., 2008; Milando et al., 2016). Although water-soluble Cu has been shown  
472 as the most important contributor to  $OP^{AA}$  (Fang et al., 2016; Ayres et al., 2008; Visentin et al., 2016), Lin and Yu  
473 (2020) reported a strong antagonistic interaction of Cu with imidazole and pyridine, both of which are alkaloid  
474 compounds (i.e. reduced organic nitrogen compounds), for oxidizing AA. The unprotonated nitrogen atom in alkaloids  
475 tends to chelate Cu, thus reducing its reactivity with AA. The antagonistic effect of Cu have been reported with other  
476 organic compounds (e.g. citric acid) as well (Pietrogrande et al., 2019). Since many of the alkaloid compounds are  
477 water-insoluble but methanol-soluble, it is possible that these compounds are efficiently extracted in methanol, causing  
478 the Thus, apparently lower levels of methanol-soluble  $OP^{AA}$  compared to the water-soluble  $OP^{AA}$  at CMP might be  
479 associated with the chelation of Cu by these alkaloids or other organic species, which could be more efficiently  
480 extracted in methanol.

481 The medians of  $M/W^{OP}$  were very high (1.4–3.8) for both ·OH-based endpoints (i.e.  $OP^{OH-SLF}_v$  and  $OP^{OH-DTT}_v$ ) (~~2.1–~~  
482 ~~3.8 for  $OP^{OH-SLF}_v$  and 1.4–1.9 for  $OP^{OH-DTT}_v$~~ ), indicating that methanol is able to more efficiently extract the redox-  
483 active components driving the response of these OP endpoints. In addition to ·OH-active organic species, e.g. quinones  
484 (Charrier and Anastasio, 2015; Xiong et al., 2017; Yu et al., 2018) We, which are more soluble in methanol, we suspect

485 that one of such components could be organic-complexed Fe. As a Fenton reagent, Fe can catalyze the transfer of  
486 electrons from  $\text{H}_2\text{O}_2$  to  $\cdot\text{OH}$  (Held et al., 1996). The generation of  $\cdot\text{OH}$  is further enhanced by the complexation of Fe  
487 with organic species (Wei et al., 2018; Gonzalez et al., 2017; Xiong et al., 2017; Yu et al., 2018). In a previous study  
488 conducted at our CMP site, Wei et al. (2018) found a significant fraction of Fe complexed with hydrophobic organic  
489 species ( $28 \pm 22\%$ ). That study also reported a substantially higher ratio of Fe concentration in 50% methanol to that  
490 in water ( $1.42 \pm 0.19$ ), which showed some seasonality ( $1.97 \pm 0.17$  during winter and  $1.33 \pm 0.20$  in summer). This  
491 seasonal pattern of Fe solubility in methanol versus water is consistent with the time series of  $\text{M}/\text{W}^{\text{OP}}$  for  $\text{OP}^{\text{OH-SLF}_v}$   
492 at most sites (showing higher values in winter than summer; SI Table S75), which further corroborated that Fe  
493 complexed with hydrophobic organic fraction of  $\text{PM}_{2.5}$  could be majorly responsible for the  $\text{OP}^{\text{OH-SLF}_v}$  and  $\text{OP}^{\text{OH-DTT}_v}$   
494 in the methanol extracts. However, detailed chemical characterization will be needed to confirm these hypotheses,  
495 which will be explored in our subsequent publications.

496 We also calculated Pearson's  $r$  for the regression between respective water-soluble and methanol-soluble OP endpoints  
497 for individual sites, which are shown in Table 3.  $\text{OP}^{\text{DTT}_v}$  showed some good correlation between two extraction  
498 protocols ( $r = 0.43 - 0.74$  except at STL), while correlations were generally poor ( $r < 0.60$ ) for other four endpoints  
499 (i.e.  $\text{OP}^{\text{AA}_v}$ ,  $\text{OP}^{\text{GSH}_v}$ ,  $\text{OP}^{\text{OH-SLF}_v}$  and  $\text{OP}^{\text{OH-DTT}_v}$ ). It indicates that the components driving the response of  $\text{OP}^{\text{DTT}_v}$  could  
500 be more uniformly extracted in both water and methanol. However, there are additional water-insoluble species driving  
501 the response of  $\text{OP}^{\text{AA}_v}$ ,  $\text{OP}^{\text{GSH}_v}$ ,  $\text{OP}^{\text{OH-SLF}_v}$  and  $\text{OP}^{\text{OH-DTT}_v}$ , which are more efficiently extracted in methanol than  
502 water.

### 503 3.5.4 Site-to-site comparison of OP and mass concentration of $\text{PM}_{2.5}$

504 To further evaluate the spatial trend of OP across the Midwest US region, we calculated both COD and correlation  
505 coefficients (Pearson's  $r$ ) for different site pairs, which are shown in Figure 8 (mass concentrations and water-soluble  
506 OP of  $\text{PM}_{2.5}$ ), and Figure 9 (methanol-soluble  $\text{PM}_{2.5}$  OP).

#### 507 *$\text{PM}_{2.5}$ mass concentration and water-soluble $\text{PM}_{2.5}$ OP*

508  $\text{PM}_{2.5}$  mass concentrations showed low levels of  $\text{COD}_s$  (0.13 – 0.25, median: 0.20), confirming a spatially  
509 homogeneous distribution of  $\text{PM}_{2.5}$  as indicated earlier (Figure 8a). Conversely, we observed generally higher CODs  
510 (median = 0.27 – 0.43) for all water-soluble OPv endpoints, i.e.  $\text{OP}^{\text{AA}_v}$  (0.38 – 0.56, median: 0.43),  $\text{OP}^{\text{GSH}_v}$  (0.28 –  
511 0.51, median: 0.35),  $\text{OP}^{\text{OH-SLF}_v}$  (0.30 – 0.40, median: 0.35),  $\text{OP}^{\text{DTT}_v}$  (0.19 – 0.34, median: 0.25), and  $\text{OP}^{\text{OH-DTT}_v}$  (0.21  
512 – 0.38, median: 0.27) (Figure 8b-f). Our results showing a stronger spatial variability in OP than PM mass are largely  
513 in agreement with a recent study (Daellenbach et al., 2020) analyzing a comprehensive dataset for OP in Europe,  
514 which showed that both OPv (measured by DTT, 2',7'-Dichlorofluorescein Diacetate and AA assays) and  $\text{PM}_{10}$  mass  
515 concentrations were elevated in the urban environments (e.g. Paris and the Po valley), but  $\text{PM}_{10}$  was more regionally  
516 distributed than OPv.

517 Interestingly, we found poor correlations for  $\text{PM}_{2.5}$  among all site pairs ( $r < 0.60$ ), except IND and BON ( $r = 0.63$ ). It  
518 implies that despite a homogeneous spatial distribution, emission sources of the chemical species composing  $\text{PM}_{2.5}$

519 are different at different sites. The correlations were also weak ( $r < 0.60$  for most cases) for the OP endpoints showing  
520 high CODs, i.e.  $OP^{AA}$ ,  $OP^{GSH}$ ,  $OP^{OH-SLF}$  and  $OP^{OH-DTT}$ , which indicates a more pronounced effect of local point sources  
521 on these OP endpoints compared to the regional sources. In contrast,  $OP^{DTT_v}$  showed stronger correlation ( $r = 0.48 -$   
522  $0.76$ , median:  $0.62$ ) for most site pairs. Higher correlations for the DTT activity combined with lower CODs suggests  
523 that the regional sources such as long-range transport or atmospheric processing could have a larger influence on  
524  $OP^{DTT}$  than the local sources.

### 525 *Methanol-soluble $PM_{2.5}$ OP*

526 In comparison to water-soluble  $PM_{2.5}$  OP, CODs for the methanol-soluble OP were generally lower (median:  $0.21 -$   
527  $0.35$ ; Figure 9), indicating higher spatial homogeneity of methanol-soluble PM chemical components that are sensitive  
528 to OP. Similar to water-soluble  $OP^{DTT_v}$ , the methanol-soluble  $OP^{DTT_v}$  showed the lowest COD ( $0.14 - 0.26$ , median:  
529  $0.21$ ) among five endpoints (Figure 9d), which was consistent with Gao et al. (2017) showing a rather low COD (less  
530 than  $0.23$ ) for both water-soluble and methanol-soluble  $OP^{DTT}$  in Southeast US. Overall, higher correlation coefficients  
531 were observed for the methanol-soluble OP (median:  $0.41 - 0.67$  for different endpoints) than the corresponding water-  
532 soluble endpoints (median:  $0.13 - 0.62$ ). The correlation coefficients were more elevated for certain endpoints such  
533 as  $OP^{AA_v}$  ( $r = 0.38 - 0.62$ , median:  $0.46$ ) and  $OP^{GSH_v}$  ( $r = 0.23 - 0.65$ , median:  $0.41$ ) than others. It is possible that  
534 methanol is able to extract more redox-active PM components coming from common-regional emission sources, e.g.  
535 biomass burning or secondary organic aerosols, present at these sites. The components originated from these common  
536 sources could mask the effect of other components originated from the local sources having a narrower range of  
537 solubilities, and thus yielding to an overall lower spatiotemporal variability and better correlation among different sites.

### 538 3.6-5 Correlations of OP with $PM_{2.5}$ mass concentration

539 Pearson's  $r$  and the slope for simple linear regression of volume-normalized OP activities versus  $PM_{2.5}$  mass  
540 concentrations were computed for each individual site, and are listed in Table 4. For both water-soluble and methanol-  
541 soluble OP, the endpoints of  $OP^{AA_v}$ ,  $OP^{OH-SLF_v}$  and  $OP^{OH-DTT_v}$  were poorly correlated with  $PM_{2.5}$  mass ( $r < 0.60$  in  
542 most cases), while  $OP^{GSH_v}$  and  $OP^{DTT_v}$  were moderately-to-strongly correlated with  $PM_{2.5}$  mass ( $r = 0.38 - 0.73$  for  
543  $OP^{GSH_v}$ , and  $0.54 - 0.82$  for  $OP^{DTT_v}$ , except at STL). The lower correlation of  $OP^{AA}$  and higher correlation of  $OP^{DTT}$   
544 are consistent with multiple previous studies comparing these endpoints (Visentin et al., 2016; Yang et al.,  
545 2014; Janssen et al., 2014). Decent correlations for  $OP^{GSH_v}$  and  $OP^{DTT_v}$  showed that PM mass concentrations can drive  
546 these endpoints to some extent at few locations. However, it is important to note that despite these good correlations,  
547 the slope of regression for OP vs.  $PM_{2.5}$  mass varied a lot among five sampling sites (range for  $OP^{GSH_v}$  is  $0.003 -$   
548  $0.016$  nmol/min/ $\mu$ g, and  $0.005 - 0.028$  nmol/min/ $\mu$ g for  $OP^{DTT_v}$ ), indicating substantial spatiotemporal heterogeneity  
549 in the intrinsic potency of the particles to generate ROS at these sites. This is further corroborated by the spatiotemporal  
550 variability of  $OP^{GSH_m}$  and  $OP^{DTT_m}$  at different sites as shown in Figure 5 and 6. Thus,  $PM_{2.5}$  mass concentrations have  
551 only a limited role in determining the oxidative levels of the  $PM_{2.5}$  at these sites, and OP seems to be largely driven  
552 by the PM chemical composition. Given that the current air quality standards across the world focus only on mass  
553 concentration of  $PM_{2.5}$ , these results indicate towards the inadequacy of this mass-centered approach.



### 554 3.7-6 Intercorrelation among different OP endpoints

555 We also calculated the correlation coefficient (Pearson's  $r$ ) for all pairs of different OP<sub>v</sub> endpoints at each site, which  
556 are listed in Table 5. A high correlation coefficient indicates a common source (or a common pool of chemical  
557 components) driving the response of those OP endpoints. For water-soluble OP, the intercorrelations among different  
558 endpoints were generally poor at urban sites, i.e. CHI, STL, and IND ( $r < 0.60$ ). Correlations were also poor for nearly  
559 all pairs of methanol-soluble OP at STL and IND, but CHI showed significantly elevated  $r$  values among different OP  
560 endpoints ( $r = 0.59 - 0.82$ ). Compared to more urbanized sites, the correlations were generally higher at the local sites,  
561 i.e. CMP and BON, with  $r > 0.60$  for many pairs of both water-soluble and methanol-soluble OP<sub>v</sub>. Since both of these  
562 sites are located in smaller cities, the sources of redox-active components probably have lesser complexity compared  
563 to the major city sites, which have multiple and more complex emission sources. ~~For example~~ As discussed in section  
564 3.2, CMP is adjacent to a major road, and thus largely impacted by the vehicular emissions owing to its location  
565 adjacent to a major road. Similarly, BON being a rural site is largely impacted by the agricultural emissions with  
566 marginal impact from vehicular emissions and other sources such as long-range transport from surrounding cities  
567 (Kim et al., 2005; Buzcu-Guven et al., 2007). Thus, a lack of other major sources contributing to components, which  
568 can drive these endpoints in different directions through their interactions (i.e. synergistic or antagonistic), leads to  
569 the similarity of their responses and hence a good correlation among them at these two sites. Among all OP endpoints,  
570 OP<sup>OH-DTT</sup><sub>v</sub> showed poorest correlations with other endpoints except OP<sup>OH-SLF</sup><sub>v</sub>, with which it was correlated at most  
571 sites (i.e. CHI, IND, CMP and BON) for the methanol-soluble extracts ( $r = 0.66 - 0.84$ ). Since both of these endpoints  
572 measure the rate of generation of  $\cdot\text{OH}$ , it probably indicates a synergistic role of metals with organic compounds [e.g.  
573 Fe with humic-like substances (HULIS), as shown in many previous studies (Yu et al., 2018; Charrier and Anastasio,  
574 2015; Gonzalez et al., 2017; Wei et al., 2018; Ma et al., 2015)] in partly driving the response of both of these endpoints.  
575 Note, OP<sup>OH-DTT</sup> is a relatively newly developed assay, and there is hardly any previous literature on its comparison  
576 with other OP endpoints.

577 Overall, a poor-to-moderate and inconstant intercorrelation trend among different endpoints of both water-soluble and  
578 methanol-soluble OP at most sites indicates that all these assays could be deficient from being ideal and measuring a  
579 single endpoint is not enough to represent the overall OP activity. Although, the OP endpoints used in our study have  
580 covered some of the well-known and important pathways of the *in vivo* oxidative stress caused by PM<sub>2.5</sub>, there are  
581 other endpoints (e.g. consumption of cysteine, formation of H<sub>2</sub>O<sub>2</sub>, etc.), and more assays can be developed in the  
582 future. We suggest that a collection of diverse range of OP endpoints, measured separately as done in our study could  
583 better capture the role of different PM components and their interactions via different pathways for driving the  
584 oxidative levels of the PM in a region. However, it should be noted that our study is not designed to assess and rank  
585 the biological relevance of these acellular endpoints, which will require an integration of these and possibly other  
586 novel assays involving different routes of oxidative stress, in either toxicological or epidemiological studies. measuring  
587 a single endpoint is not enough to represent the overall OP activity. The diverse range of OP endpoints used in our  
588 study could better capture the role of different PM components and their interactions via different pathways for driving  
589 the oxidative levels of the PM in a region.

#### 590 4 Conclusion

591 We analyzed both water-soluble and methanol-soluble OP of ambient PM<sub>2.5</sub> in the Midwest US using five different  
592 acellular endpoints, including OP<sup>AA</sup>, OP<sup>GSH</sup>, OP<sup>OH-SLF</sup>, OP<sup>DTT</sup> and OP<sup>OH-DTT</sup>. The spatiotemporal profiles of all OP  
593 endpoints and PM<sub>2.5</sub> mass concentration were investigated for one-year timescale from May 2018 to May 2019 using  
594 the Hi-Vol filter samples collected from five Midwest US sites located in urban, rural, and roadside environments.  
595 Compared to homogeneously distributed PM<sub>2.5</sub> mass, all OP endpoints showed significant spatiotemporal variations  
596 among different seasons and sites. Seasonally, most OP endpoints generally peaked in summer for both water-soluble  
597 and methanol-soluble OP. Spatially, the roadside site showed the highest OP levels for most OP endpoints in water-  
598 soluble extracts, while there were occasional peaks in methanol-soluble extracts at other urban sites. Our results  
599 showed very limited differences in the spatiotemporal profiles between OP<sub>m</sub> and OP<sub>v</sub> for most endpoints, indicating  
600 a marginal role of PM<sub>2.5</sub> mass in causing the spatiotemporal variability of OP.

601 Comparing the OP for water- and methanol-soluble extracts, we observed significantly higher OP levels in methanol  
602 extracts than the corresponding water-soluble OP activities. This trend was much stronger for ·OH generation  
603 endpoints (i.e. OP<sup>OH-SLF</sup> and OP<sup>OH-DTT</sup>), indicating a substantial contribution of Fe and its organic complexes, which  
604 could be more efficiently extracted in methanol. In comparison to water-soluble OP, methanol-soluble OP showed  
605 lower spatial heterogeneity, and higher intercorrelations among different endpoints, which is probably attributed to a  
606 more efficient extraction of water-insoluble redox-active species in methanol originated from various emission sources  
607 at different sites.

608 The correlations of OP with PM<sub>2.5</sub> mass showed a diverse range, with certain endpoints such as OP<sup>AA</sup>, OP<sup>OH-SLF</sup> and  
609 OP<sup>OH-DTT</sup> showing a poor correlation, while other endpoints (i.e. OP<sup>GSH</sup> and OP<sup>DTT</sup>) showing a moderate-to-strong  
610 correlation. Despite these occasional strong correlations, the sensitivity of all OP endpoints towards mass, indicated  
611 by the slope of OP vs. PM<sub>2.5</sub> mass as well as the intrinsic OP (OP<sub>m</sub>), varied substantially for all OP endpoints across  
612 different sites and seasons, showing only a marginal effect of mass concentrations in controlling the oxidative levels  
613 of PM<sub>2.5</sub>. Moreover, relatively poor and inconsistent correlations among different OP endpoints reflected different  
614 pathways of various ROS-active PM<sub>2.5</sub> components for exerting oxidative stress. Since our study cannot comment on  
615 the biological relevance of these different pathways, we recommend integrating all these and other assays in  
616 toxicological or epidemiological studies, to assess their relative utilities.

617 Collectively, the results obtained through our study provides a strong rationale to recommend that the different  
618 endpoints of OP provide useful and additional information than the mass concentrations, which could be relevant to  
619 assess the public health impacts associated with ambient PM<sub>2.5</sub>. Our future studies will explore the contribution of  
620 different chemical components and their emission sources in determining the oxidative levels of ambient PM<sub>2.5</sub> in the  
621 Midwest US.

622 *Data availability.* The data on OP and mass concentration of ambient PM<sub>2.5</sub> samples collected in the Midwest US are  
623 available upon request from the corresponding author.

624 *Author contribution.* HY: collection of PM<sub>2.5</sub> samples, measurement of OP, data analysis, manuscript organization  
625 and writing; JVP: collection of PM<sub>2.5</sub> samples, manuscript editing and revision; YW: collection of PM<sub>2.5</sub> samples,  
626 manuscript editing and revision; VV: conceptualization of study design and methodology, manuscript organization  
627 and editing, and overall project supervision.

628 *Competing Interests.* The authors declare that they do not have any competing interests.

629 *Acknowledgements.* This material is based upon work supported by the National Science Foundation under Grant No.  
630 CBET-1847237. We acknowledge the support from Brent Stephens, Yi Wang, and Will Wetherell for providing us  
631 the access to the site in Chicago, Indianapolis and St. Louis, respectively.

## 632 **References**

633 Abbas, I., Verdin, A., Escande, F., Saint-Georges, F., Cazier, F., Mulliez, P., Courcot, D., Shirali, P., Gosset, P., and  
634 Garçon, G.: *In vitro* short-term exposure to air pollution PM<sub>2.5-0.3</sub> induced cell cycle alterations and genetic instability  
635 in a human lung cell coculture model, *Environmental Research*, 147, 146-158, 2016.

636 Abrams, J. Y., Weber, R. J., Klein, M., Samat, S. E., Chang, H. H., Strickland, M. J., Verma, V., Fang, T., Bates, J.  
637 T., and Mulholland, J. A.: Associations between ambient fine particulate oxidative potential and cardiorespiratory  
638 emergency department visits, *Environmental Health Perspectives*, 125, 107008, 10.1289/ehp1545, 2017.

639 Allan, K., Kelly, F., and Devereux, G.: Antioxidants and allergic disease: a case of too little or too much?, *Clinical &*  
640 *Experimental Allergy*, 40, 370-380, 2010.

641 Apeayeyi, E., Bank, M. S., and Spengler, J. D.: Distribution of heavy metals in road dust along an urban-rural gradient  
642 in Massachusetts, *Atmospheric Environment*, 45, 2310-2323, <https://doi.org/10.1016/j.atmosenv.2010.11.015>, 2011.

643 Araujo, J. A., Barajas, B., Kleinman, M., Wang, X., Bennett, B. J., Gong, K. W., Navab, M., Harkema, J., Sioutas, C.,  
644 and Lulis, A. J.: Ambient particulate pollutants in the ultrafine range promote early atherosclerosis and systemic  
645 oxidative stress, *Circulation Research*, 102, 589-596, 2008.

646 Ayres, J. G., Borm, P., Cassee, F. R., Castranova, V., Donaldson, K., Ghio, A., Harrison, R. M., Hider, R., Kelly, F.,  
647 and Kooter, I. M.: Evaluating the toxicity of airborne particulate matter and nanoparticles by measuring oxidative  
648 stress potential—a workshop report and consensus statement, *Inhalation Toxicology*, 20, 75-99,  
649 10.1080/08958370701665517, 2008.

650 Bates, J. T., Weber, R. J., Abrams, J., Verma, V., Fang, T., Klein, M., Strickland, M. J., Sarnat, S. E., Chang, H. H.,  
651 and Mulholland, J. A.: Reactive oxygen species generation linked to sources of atmospheric particulate matter and  
652 cardiorespiratory effects, *Environmental Science & Technology*, 49, 13605-13612, 10.1021/acs.est.5b02967, 2015.

653 Bates, J. T., Fang, T., Verma, V., Zeng, L., Weber, R. J., Tolbert, P. E., Abrams, J. Y., Sarnat, S. E., Klein, M., and  
654 Mulholland, J. A.: Review of acellular assays of ambient particulate matter oxidative potential: Methods and

655 relationships with composition, sources, and health effects, *Environmental Science & Technology*, 53, 4003-4019,  
656 2019.

657 Baumann, K., Jayanty, R., and Flanagan, J. B.: Fine particulate matter source apportionment for the chemical  
658 speciation trends network site at Birmingham, Alabama, using positive matrix factorization, *Journal of the Air &  
659 Waste Management Association*, 58, 27-44, 2008.

660 Becker, S., Dailey, L. A., Soukup, J. M., Grambow, S. C., Devlin, R. B., and Huang, Y.-C. T.: Seasonal variations in  
661 air pollution particle-induced inflammatory mediator release and oxidative stress, *Environmental Health Perspectives*,  
662 113, 1032-1038, 10.1289/ehp.7996, 2005.

663 Borlaza, L. J. S., Weber, S., Jaffrezo, J.-L., Houdier, S., Slama, R., Rieux, C., Albinet, A., Micallef, S., Trébluchon,  
664 C., and Uzu, G.: Disparities in particulate matter (PM 10) origins and oxidative potential at a city scale (Grenoble,  
665 France)–Part 2: Sources of PM 10 oxidative potential using multiple linear regression analysis and the predictive  
666 applicability of multilayer perceptron neural network analysis, *Atmospheric Chemistry and Physics*, 21, 9719-9739,  
667 2021.

668 Buzcu-Guven, B., Brown, S. G., Frankel, A., Hafner, H. R., and Roberts, P. T.: Analysis and apportionment of organic  
669 carbon and fine particulate matter sources at multiple sites in the midwestern United States, *Journal of the Air & Waste  
670 Management Association*, 57, 606-619, 2007.

671 Cachon, B. F., Firmin, S., Verdin, A., Ayi-Fanou, L., Billet, S., Cazier, F., Martin, P. J., Aissi, F., Courcot, D., and  
672 Sanni, A.: Proinflammatory effects and oxidative stress within human bronchial epithelial cells exposed to  
673 atmospheric particulate matter (PM<sub>2.5</sub> and PM<sub>>2.5</sub>) collected from Cotonou, Benin, *Environmental Pollution*, 185, 340-  
674 351, 2014.

675 Calas, A., Uzu, G., Kelly, F. J., Houdier, S., Martins, J. M., Thomas, F., Molton, F., Charron, A., Dunster, C., and  
676 Oliete, A.: Comparison between five acellular oxidative potential measurement assays performed with detailed  
677 chemistry on PM 10 samples from the city of Chamonix (France), *Atmospheric Chemistry and Physics*, 18, 7863-  
678 7875, 2018.

679 Calas, A., Uzu, G., Besombes, J.-L., Martins, J. M., Redaelli, M., Weber, S., Charron, A., Albinet, A., Chevrier, F.,  
680 and Brulfert, G.: Seasonal variations and chemical predictors of oxidative potential (OP) of particulate matter (PM),  
681 for seven urban French sites, *Atmosphere*, 10, 698, 2019.

682 Cesari, D., Merico, E., Grasso, F. M., Decesari, S., Belosi, F., Manarini, F., De Nuntiis, P., Rinaldi, M., Volpi, F., and  
683 Gambaro, A.: Source apportionment of PM<sub>2.5</sub> and of its oxidative potential in an industrial suburban site in South  
684 Italy, *Atmosphere*, 10, 758, 2019.

685 Charrier, J., and Anastasio, C.: On dithiothreitol (DTT) as a measure of oxidative potential for ambient particles:  
686 evidence for the importance of soluble transition metals, *Atmospheric Chemistry and Physics*, 12, 11317-11350,  
687 10.5194/acp-12-9321-2012, 2012.

688 Charrier, J. G., McFall, A. S., Richards-Henderson, N. K., and Anastasio, C.: Hydrogen peroxide formation in a  
689 surrogate lung fluid by transition metals and quinones present in particulate matter, *Environmental Science &*  
690 *Technology*, 48, 7010-7017, 10.1021/es501011w, 2014.

691 Charrier, J. G., and Anastasio, C.: Rates of hydroxyl radical production from transition metals and quinones in a  
692 surrogate lung fluid, *Environmental Science & Technology*, 49, 9317-9325, 10.1021/acs.est.5b01606, 2015.

693 Charrier, J. G., McFall, A. S., Vu, K. K., Baroi, J., Olea, C., Hasson, A., and Anastasio, C.: A bias in the “mass-  
694 normalized” DTT response—An effect of non-linear concentration-response curves for copper and manganese,  
695 *Atmospheric Environment*, 144, 325-334, 10.1016/j.atmosenv.2016.08.071, 2016.

696 Cho, A. K., Sioutas, C., Miguel, A. H., Kumagai, Y., Schmitz, D. A., Singh, M., Eiguren-Fernandez, A., and Froines,  
697 J. R.: Redox activity of airborne particulate matter at different sites in the Los Angeles Basin, *Environmental Research*,  
698 99, 40-47, 10.1016/j.envres.2005.01.003, 2005.

699 Chung, M. Y., Lazaro, R. A., Lim, D., Jackson, J., Lyon, J., Rendulic, D., and Hasson, A. S.: Aerosol-borne quinones  
700 and reactive oxygen species generation by particulate matter extracts, *Environmental Science & Technology*, 40, 4880-  
701 4886, 2006.

702 Councill, T. B., Duckenfield, K. U., Landa, E. R., and Callender, E.: Tire-wear particles as a source of zinc to the  
703 environment, *Environmental science & technology*, 38, 4206-4214, 2004.

704 Daellenbach, K. R., Uzu, G., Jiang, J., Cassagnes, L.-E., Leni, Z., Vlachou, A., Stefanelli, G., Canonaco, F., Weber,  
705 S., and Segers, A.: Sources of particulate-matter air pollution and its oxidative potential in Europe, *Nature*, 587, 414-  
706 419, 2020.

707 Deng, X., Zhang, F., Rui, W., Long, F., Wang, L., Feng, Z., Chen, D., and Ding, W.: PM<sub>2.5</sub>-induced oxidative stress  
708 triggers autophagy in human lung epithelial A549 cells, *Toxicology in vitro*, 27, 1762-1770, 2013.

709 Dominici, F., McDermott, A., Zeger, S. L., and Samet, J. M.: Airborne particulate matter and mortality: timescale  
710 effects in four US cities, *American Journal of Epidemiology*, 157, 1055-1065, 2003.

711 Fang, T., Verma, V., Guo, H., King, L. E., Edgerton, E. S., and Weber, R. J.: A semi-automated system for quantifying  
712 the oxidative potential of ambient particles in aqueous extracts using the dithiothreitol (DTT) assay: results from the  
713 Southeastern Center for Air Pollution and Epidemiology (SCAPE), *Atmospheric Measurement Techniques*, 8, 471-  
714 482, 10.5194/amt-8-471-2015, 2015.

715 Fang, T., Verma, V., Bates, J. T., Abrams, J., Klein, M., Strickland, M. J., Sarnat, S. E., Chang, H. H., Mulholland, J.  
716 A., and Tolbert, P. E.: Oxidative potential of ambient water-soluble PM<sub>2.5</sub> in the southeastern United States: contrasts  
717 in sources and health associations between ascorbic acid (AA) and dithiothreitol (DTT) assays, *Atmospheric*  
718 *Chemistry and Physics*, 16, 3865-3879, 10.5194/acp-16-3865-2016, 2016.

719 Feng, S., Gao, D., Liao, F., Zhou, F., and Wang, X.: The health effects of ambient PM<sub>2.5</sub> and potential mechanisms,  
720 *Ecotoxicology and Environmental Safety*, 128, 67-74, 10.1016/j.ecoenv.2016.01.030, 2016.

721 Franco, R., Schoneveld, O., Georgakilas, A. G., and Panayiotidis, M. I.: Oxidative stress, DNA methylation and  
722 carcinogenesis, *Cancer Letters*, 266, 6-11, <https://doi.org/10.1016/j.canlet.2008.02.026>, 2008.

723 Gao, D., Fang, T., Verma, V., Zeng, L., and Weber, R. J.: A method for measuring total aerosol oxidative potential  
724 (OP) with the dithiothreitol (DTT) assay and comparisons between an urban and roadside site of water-soluble and  
725 total OP, *Atmospheric Measurement Techniques*, 10, 2821, 2017.

726 Gao, D., Godri Pollitt, K. J., Mulholland, J. A., Russell, A. G., and Weber, R. J.: Characterization and comparison of  
727 PM 2.5 oxidative potential assessed by two acellular assays, *Atmospheric Chemistry and Physics*, 20, 5197-5210,  
728 2020a.

729 Gao, D., Mulholland, J. A., Russell, A. G., and Weber, R. J.: Characterization of water-insoluble oxidative potential  
730 of PM<sub>2.5</sub> using the dithiothreitol assay, *Atmospheric Environment*, 224, 117327,  
731 <https://doi.org/10.1016/j.atmosenv.2020.117327>, 2020b.

732 Garçon, G., Dagher, Z., Zerimech, F., Ledoux, F., Courcot, D., Aboukais, A., Puskaric, E., and Shirali, P.: Dunkerque  
733 City air pollution particulate matter-induced cytotoxicity, oxidative stress and inflammation in human epithelial lung  
734 cells (L132) in culture, *Toxicology in vitro*, 20, 519-528, 2006.

735 Garg, B. D., Cadle, S. H., Mulawa, P. A., Groblicki, P. J., Laroo, C., and Parr, G. A.: Brake Wear Particulate Matter  
736 Emissions, *Environmental Science & Technology*, 34, 4463-4469, 10.1021/es001108h, 2000.

737 Gietl, J. K., Lawrence, R., Thorpe, A. J., and Harrison, R. M.: Identification of brake wear particles and derivation of  
738 a quantitative tracer for brake dust at a major road, *Atmospheric Environment*, 44, 141-146, 2010.

739 Gildemeister, A. E., Hopke, P. K., and Kim, E.: Sources of fine urban particulate matter in Detroit, MI, *Chemosphere*,  
740 69, 1064-1074, <https://doi.org/10.1016/j.chemosphere.2007.04.027>, 2007.

741 Godri, K. J., Harrison, R. M., Evans, T., Baker, T., Dunster, C., Mudway, I. S., and Kelly, F. J.: Increased oxidative  
742 burden associated with traffic component of ambient particulate matter at roadside and urban background schools sites  
743 in London, *PLoS One*, 6, e21961, 10.1371/journal.pone.0021961, 2011.

744 Gonzalez, D. H., Cala, C. K., Peng, Q., and Paulson, S. E.: HULIS enhancement of hydroxyl radical formation from  
745 Fe (II): kinetics of fulvic acid-Fe (II) complexes in the presence of lung antioxidants, *Environmental Science &*  
746 *Technology*, 51, 7676-7685, 2017.

747 Grevendonk, L., Janssen, B. G., Vanpoucke, C., Lefebvre, W., Hoxha, M., Bollati, V., and Nawrot, T. S.:  
748 Mitochondrial oxidative DNA damage and exposure to particulate air pollution in mother-newborn pairs,  
749 *Environmental Health*, 15, 1-8, 2016.

750 Gurgueira, S. A., Lawrence, J., Coull, B., Murthy, G. K., and González-Flecha, B.: Rapid increases in the steady-state  
751 concentration of reactive oxygen species in the lungs and heart after particulate air pollution inhalation, *Environmental*  
752 *Health Perspectives*, 110, 749-755, 2002.

753 Haberzettl, P., O'Toole, T. E., Bhatnagar, A., and Conklin, D. J.: Exposure to fine particulate air pollution causes  
754 vascular insulin resistance by inducing pulmonary oxidative stress, *Environmental Health Perspectives*, 124, 1830-  
755 1839, 2016.

756 Hammond, D. M., Dvonch, J. T., Keeler, G. J., Parker, E. A., Kamal, A. S., Barres, J. A., Yip, F. Y., and Brakefield-  
757 Caldwell, W.: Sources of ambient fine particulate matter at two community sites in Detroit, Michigan, *Atmospheric*  
758 *Environment*, 42, 720-732, 2008.

759 Held, K. D., Sylvester, F. C., Hopcia, K. L., and Biaglow, J. E.: Role of Fenton chemistry in thiol-induced toxicity  
760 and apoptosis, *Radiation Research*, 145, 542-553, 10.2307/3579272, 1996.

761 Hu, S., Polidori, A., Arhami, M., Shafer, M., Schauer, J., Cho, A., and Sioutas, C.: Redox activity and chemical  
762 speciation of size fractioned PM in the communities of the Los Angeles-Long Beach harbor, *Atmospheric Chemistry*  
763 *and Physics*, 8, 6439-6451, 10.5194/acp-8-6439-2008, 2008.

764 Hulskotte, J., Denier van der Gon, H., Visschedijk, A., and Schaap, M.: Brake wear from vehicles as an important  
765 source of diffuse copper pollution, *Water Science & Technology*, 56, 223-231, 10.2166/wst.2007.456, 2007.

766 Janssen, N. A., Yang, A., Strak, M., Steenhof, M., Hellack, B., Gerlofs-Nijland, M. E., Kuhlbusch, T., Kelly, F.,  
767 Harrison, R., and Brunekreef, B.: Oxidative potential of particulate matter collected at sites with different source  
768 characteristics, *Science of the Total Environment*, 472, 572-581, 10.1016/j.scitotenv.2013.11.099, 2014.

769 Jeong, C.-H., Traub, A., Huang, A., Hilker, N., Wang, J. M., Herod, D., Dabek-Zlotorzynska, E., Celo, V., and Evans,  
770 G. J.: Long-term analysis of PM<sub>2.5</sub> from 2004 to 2017 in Toronto: Composition, sources, and oxidative potential,  
771 *Environmental Pollution*, 263, 114652, 2020.

772 Künzli, N., Mudway, I. S., Götschi, T., Shi, T., Kelly, F. J., Cook, S., Burney, P., Forsberg, B., Gauderman, J. W., and  
773 Hazenkamp, M. E.: Comparison of oxidative properties, light absorbance, and total and elemental mass concentration  
774 of ambient PM<sub>2.5</sub> collected at 20 European sites, *Environmental Health Perspectives*, 114, 684-690, 10.1289/ehp.8584,  
775 2006.

776 Kampfrath, T., Maiseyeu, A., Ying, Z., Shah, Z., Deiluiis, J. A., Xu, X., Kherada, N., Brook, R. D., Reddy, K. M.,  
777 and Padture, N. P.: Chronic fine particulate matter exposure induces systemic vascular dysfunction via NADPH  
778 oxidase and TLR4 pathways, *Circulation Research*, 108, 716-726, 2011.

779 Kaufman, J. A., Wright, J. M., Rice, G., Connolly, N., Bowers, K., and Anixt, J.: Ambient ozone and fine particulate  
780 matter exposures and autism spectrum disorder in metropolitan Cincinnati, Ohio, *Environmental Research*, 171, 218-  
781 227, <https://doi.org/10.1016/j.envres.2019.01.013>, 2019.

782 Kelly, F. J.: Oxidative stress: its role in air pollution and adverse health effects, *Occupational and Environmental*  
783 *Medicine*, 60, 612-616, 2003.

784 Kim, E., Hopke, P. K., Kenski, D. M., and Koerber, M.: Sources of fine particles in a rural midwestern U.S. Area,  
785 *Environmental Science & Technology*, 39, 4953-4960, 10.1021/es0490774, 2005.

786 Kleinman, M. T., Hamade, A., Meacher, D., Oldham, M., Sioutas, C., Chakrabarti, B., Stram, D., Froines, J. R., and  
787 Cho, A. K.: Inhalation of concentrated ambient particulate matter near a heavily trafficked road stimulates antigen-  
788 induced airway responses in mice, *Journal of the Air & Waste Management Association*, 55, 1277-1288, 2005.

789 Kodavanti, U. P., Schladweiler, M. C., Ledbetter, A. D., Watkinson, W. P., Campen, M. J., Winsett, D. W., Richards,  
790 J. R., Crissman, K. M., Hatch, G. E., and Costa, D. L.: The spontaneously hypertensive rat as a model of human  
791 cardiovascular disease: evidence of exacerbated cardiopulmonary injury and oxidative stress from inhaled emission  
792 particulate matter, *Toxicology and Applied Pharmacology*, 164, 250-263, 10.1006/taap.2000.8899, 2000.

793 Kumagai, Y., Koide, S., Taguchi, K., Endo, A., Nakai, Y., Yoshikawa, T., and Shimojo, N.: Oxidation of proximal  
794 protein sulfhydryls by phenanthraquinone, a component of diesel exhaust particles, *Chemical Research in Toxicology*,  
795 15, 483-489, 2002.

796 Kumar, N., Liang, D., Comellas, A., Chu, A. D., and Abrams, T.: Satellite-based PM concentrations and their  
797 application to COPD in Cleveland, OH, *Journal of Exposure Science & Environmental Epidemiology*, 23, 637-646,  
798 2013.

799 Kundu, S., and Stone, E. A.: Composition and sources of fine particulate matter across urban and rural sites in the  
800 Midwestern United States, *Environmental Science: Processes & Impacts*, 16, 1360-1370, 2014.

801 Lee, C.-W., Lin, Z.-C., Hu, S. C.-S., Chiang, Y.-C., Hsu, L.-F., Lin, Y.-C., Lee, I. T., Tsai, M.-H., and Fang, J.-Y.:  
802 Urban particulate matter down-regulates filaggrin via COX2 expression/PGE2 production leading to skin barrier  
803 dysfunction, *Scientific Reports*, 6, 27995, 10.1038/srep27995, 2016.

804 Lee, J. H., and Hopke, P. K.: Apportioning sources of PM<sub>2.5</sub> in St. Louis, MO using speciation trends network data,  
805 *Atmospheric Environment*, 40, 360-377, 2006.

806 Lee, J. H., Hopke, P. K., and Turner, J. R.: Source identification of airborne PM<sub>2.5</sub> at the St. Louis-Midwest Supersite,  
807 *Journal of Geophysical Research: Atmospheres*, 111, 2006.

808 Li, N., and Nel, A. E.: Role of the Nrf2-mediated signaling pathway as a negative regulator of inflammation:  
809 implications for the impact of particulate pollutants on asthma, *Antioxidants & Redox Signaling*, 8, 88-98, 2006.

810 Li, Y., Fu, S., Li, E., Sun, X., Xu, H., Meng, Y., Wang, X., Chen, Y., Xie, C., and Geng, S.: Modulation of autophagy  
811 in the protective effect of resveratrol on PM<sub>2.5</sub>-induced pulmonary oxidative injury in mice, *Phytotherapy Research*,  
812 32, 2480-2486, 2018.



813 Lin, M., and Yu, J. Z.: Assessment of interactions between transition metals and atmospheric organics: ascorbic acid  
814 depletion and hydroxyl radical formation in organic-metal mixtures, *Environmental Science & Technology*, 54, 1431-  
815 1442, 10.1021/acs.est.9b07478, 2020.

816 Liu, Q., Baumgartner, J., Zhang, Y., Liu, Y., Sun, Y., and Zhang, M.: Oxidative potential and inflammatory impacts  
817 of source apportioned ambient air pollution in Beijing, *Environmental Science & Technology*, 48, 12920-12929, 2014.

818 Liu, W., Xu, Y., Liu, W., Liu, Q., Yu, S., Liu, Y., Wang, X., and Tao, S.: Oxidative potential of ambient PM<sub>2.5</sub> in the  
819 coastal cities of the Bohai Sea, northern China: Seasonal variation and source apportionment, *Environmental Pollution*,  
820 236, 514-528, 2018.

821 Ma, S., Ren, K., Liu, X., Chen, L., Li, M., Li, X., Yang, J., Huang, B., Zheng, M., and Xu, Z.: Production of hydroxyl  
822 radicals from Fe-containing fine particles in Guangzhou, China, *Atmospheric Environment*, 123, 72-78,  
823 10.1016/j.atmosenv.2015.10.057, 2015.

824 Milano, C., Huang, L., and Batterman, S.: Trends in PM<sub>2.5</sub> emissions, concentrations and apportionments in Detroit  
825 and Chicago, *Atmospheric Environment*, 129, 197-209, 2016.

826 Moreno, T., Kelly, F. J., Dunster, C., Oliete, A., Martins, V., Reche, C., Minguillón, M. C., Amato, F., Capdevila, M.,  
827 and de Miguel, E.: Oxidative potential of subway PM<sub>2.5</sub>, *Atmospheric Environment*, 148, 230-238, 2017.

828 Mudway, I., Kelly, F., and Holgate, S.: Oxidative stress in air pollution research, *Free Radical Biology & Medicine*,  
829 151, 2-6, 10.1016/j.freeradbiomed.2020.04.031, 2020.

830 Mudway, I. S., Duggan, S. T., Venkataraman, C., Habib, G., Kelly, F. J., and Grigg, J.: Combustion of dried animal  
831 dung as biofuel results in the generation of highly redox active fine particulates, *Particle and Fibre Toxicology*, 2, 6,  
832 10.1186/1743-8977-2-6, 2005.

833 Oh, S. M., Kim, H. R., Park, Y. J., Lee, S. Y., and Chung, K. H.: Organic extracts of urban air pollution particulate  
834 matter (PM<sub>2.5</sub>)-induced genotoxicity and oxidative stress in human lung bronchial epithelial cells (BEAS-2B cells),  
835 *Mutation Research/Genetic Toxicology and Environmental Mutagenesis*, 723, 142-151,  
836 <https://doi.org/10.1016/j.mrgentox.2011.04.003>, 2011.

837 Paraskevopoulou, D., Bougiatioti, A., Stavroulas, I., Fang, T., Lianou, M., Liakakou, E., Gerasopoulos, E., Weber, R.,  
838 Nenes, A., and Mihalopoulos, N.: Yearlong variability of oxidative potential of particulate matter in an urban  
839 Mediterranean environment, *Atmospheric Environment*, 206, 183-196, 2019.

840 Pei, Y., Jiang, R., Zou, Y., Wang, Y., Zhang, S., Wang, G., Zhao, J., and Song, W.: Effects of Fine Particulate Matter  
841 (PM<sub>2.5</sub>) on Systemic Oxidative Stress and Cardiac Function in ApoE<sup>-/-</sup> Mice, *International Journal of Environmental*  
842 *Research and Public Health*, 13, 484, 2016.

843 Perrone, M. R., Bertoli, I., Romano, S., Russo, M., Rispoli, G., and Pietrogrande, M. C.: PM<sub>2.5</sub> and PM<sub>10</sub> oxidative  
844 potential at a Central Mediterranean Site: Contrasts between dithiothreitol- and ascorbic acid-measured values in  
845 relation with particle size and chemical composition, *Atmospheric Environment*, 210, 143-155, 2019.

846 Pietrogrande, M. C., Perrone, M. R., Manarini, F., Romano, S., Udisti, R., and Becagli, S.: PM<sub>10</sub> oxidative potential  
847 at a Central Mediterranean Site: Association with chemical composition and meteorological parameters, *Atmospheric*  
848 *Environment*, 188, 97-111, 2018.

849 Pietrogrande, M. C., Bertoli, I., Manarini, F., and Russo, M.: Ascorbate assay as a measure of oxidative potential for  
850 ambient particles: Evidence for the importance of cell-free surrogate lung fluid composition, *Atmospheric*  
851 *Environment*, 211, 103-112, 10.1016/j.atmosenv.2019.05.012, 2019.

852 Poljšak, B., and Fink, R.: The protective role of antioxidants in the defence against ROS/RNS-mediated environmental  
853 pollution, *Oxidative Medicine and Cellular Longevity*, 2014, 2014.

854 Puthussery, J. V., Zhang, C., and Verma, V.: Development and field testing of an online instrument for measuring the  
855 real-time oxidative potential of ambient particulate matter based on dithiothreitol assay, *Atmospheric Measurement*  
856 *Techniques*, 11, 5767-5780, 10.5194/amt-11-5767-2018, 2018.

857 Qin, G., Xia, J., Zhang, Y., Guo, L., Chen, R., and Sang, N.: Ambient fine particulate matter exposure induces  
858 reversible cardiac dysfunction and fibrosis in juvenile and older female mice, *Particle and Fibre Toxicology*, 15, 1-  
859 14, 2018.

860 Rao, X., Zhong, J., Brook, R. D., and Rajagopalan, S.: Effect of particulate matter air pollution on cardiovascular  
861 oxidative stress pathways, *Antioxidants & Redox Signaling*, 28, 797-818, 2018.

862 Risom, L., Møller, P., and Loft, S.: Oxidative stress-induced DNA damage by particulate air pollution, *Mutation*  
863 *Research/Fundamental and Molecular Mechanisms of Mutagenesis*, 592, 119-137, 2005.

864 Riva, D. R., Magalhães, C. B., Lopes, A. A., Lanças, T., Mauad, T., Malm, O., Valença, S. S., Saldiva, P. H., Faffe,  
865 D. S., and Zin, W. A.: Low dose of fine particulate matter (PM<sub>2.5</sub>) can induce acute oxidative stress, inflammation and  
866 pulmonary impairment in healthy mice, *Inhalation Toxicology*, 23, 257-267, 10.3109/08958378.2011.566290, 2011.

867 Rosenthal, F. S., Carney, J. P., and Olinger, M. L.: Out-of-hospital cardiac arrest and airborne fine particulate matter:  
868 a case-crossover analysis of emergency medical services data in Indianapolis, Indiana, *Environmental Health*  
869 *Perspectives*, 116, 631-636, 2008.

870 Rossner, P., Svecova, V., Milcova, A., Lnenickova, Z., Solansky, I., and Sram, R. J.: Seasonal variability of oxidative  
871 stress markers in city bus drivers: Part II. Oxidative damage to lipids and proteins, *Mutation Research/Fundamental*  
872 *and Molecular Mechanisms of Mutagenesis*, 642, 21-27, <https://doi.org/10.1016/j.mrfm.2008.03.004>, 2008.

873 Sørensen, M., Daneshvar, B., Hansen, M., Dragsted, L. O., Hertel, O., Knudsen, L., and Loft, S.: Personal PM<sub>2.5</sub>  
874 exposure and markers of oxidative stress in blood, *Environmental Health Perspectives*, 111, 161-166, 2003.

875 Saffari, A., Daher, N., Shafer, M. M., Schauer, J. J., and Sioutas, C.: Seasonal and spatial variation in reactive oxygen  
876 species activity of quasi-ultrafine particles (PM<sub>0.25</sub>) in the Los Angeles metropolitan area and its association with  
877 chemical composition, *Atmospheric Environment*, 79, 566-575, 2013.

878 Saffari, A., Daher, N., Shafer, M. M., Schauer, J. J., and Sioutas, C.: Seasonal and spatial variation in dithiothreitol  
879 (DTT) activity of quasi-ultrafine particles in the Los Angeles Basin and its association with chemical species, *Journal  
880 of Environmental Science and Health, Part A*, 49, 441-451, 10.1080/10934529.2014.854677, 2014.

881 Sancini, G., Farina, F., Battaglia, C., Cifola, I., Mangano, E., Mantecca, P., Camatini, M., and Palestini, P.: Health  
882 risk assessment for air pollutants: alterations in lung and cardiac gene expression in mice exposed to Milano winter  
883 fine particulate matter (PM<sub>2.5</sub>), *PLoS One*, 9, e109685, 10.1371/journal.pone.0109685, 2014.

884 Sarnat, S. E., Winqvist, A., Schauer, J. J., Turner, J. R., and Sarnat, J. A.: Fine particulate matter components and  
885 emergency department visits for cardiovascular and respiratory diseases in the St. Louis, Missouri–Illinois,  
886 metropolitan area, *Environmental Health Perspectives*, 123, 437-444, 2015.

887 Shen, H., Barakat, A., and Anastasio, C.: Generation of hydrogen peroxide from San Joaquin Valley particles in a  
888 cell-free solution, *Atmospheric Chemistry and Physics*, 11, 753-765, 10.5194/acp-11-753-2011, 2011.

889 Son, Y., Mishin, V., Welsh, W., Lu, S.-E., Laskin, J. D., Kipen, H., and Meng, Q.: A novel high-throughput approach  
890 to measure hydroxyl radicals induced by airborne particulate matter, *International Journal of Environmental Research  
891 and Public Health*, 12, 13678-13695, 10.3390/ijerph121113678, 2015.

892 Sun, B., Shi, Y., Li, Y., Jiang, J., Liang, S., Duan, J., and Sun, Z.: Short-term PM<sub>2.5</sub> exposure induces sustained  
893 pulmonary fibrosis development during post-exposure period in rats, *Journal of Hazardous Materials*, 385, 121566,  
894 2020.

895 Szigeti, T., Dunster, C., Cattaneo, A., Cavallo, D., Spinazzè, A., Saraga, D. E., Sakellaris, I. A., de Kluizenaar, Y.,  
896 Cornelissen, E. J., and Hänninen, O.: Oxidative potential and chemical composition of PM<sub>2.5</sub> in office buildings across  
897 Europe–The OFFICAIR study, *Environment International*, 92, 324-333, 10.1016/j.envint.2016.04.015, 2016.

898 Tuet, W. Y., Fok, S., Verma, V., Rodriguez, M. S. T., Grosberg, A., Champion, J. A., and Ng, N. L.: Dose-dependent  
899 intracellular reactive oxygen and nitrogen species (ROS/RNS) production from particulate matter exposure:  
900 comparison to oxidative potential and chemical composition, *Atmospheric Environment*, 144, 335-344, 2016.

901 Verma, V., Rico-Martinez, R., Kotra, N., King, L., Liu, J., Snell, T. W., and Weber, R. J.: Contribution of water-  
902 soluble and insoluble components and their hydrophobic/hydrophilic subfractions to the reactive oxygen species-  
903 generating potential of fine ambient aerosols, *Environmental Science & Technology*, 46, 11384-11392,  
904 10.1021/es302484r, 2012.

905 Verma, V., Fang, T., Guo, H., King, L., Bates, J., Peltier, R., Edgerton, E., Russell, A., and Weber, R.: Reactive  
906 oxygen species associated with water-soluble PM<sub>2.5</sub> in the southeastern United States: spatiotemporal trends and  
907 source apportionment, *Atmospheric Chemistry and Physics*, 14, 12915-12930, 2014.

908 Vidrio, E., Phuah, C. H., Dillner, A. M., and Anastasio, C.: Generation of hydroxyl radicals from ambient fine particles  
909 in a surrogate lung fluid solution, *Environmental Science & Technology*, 43, 922-927, 10.1021/es801653u, 2009.

910 Visentin, M., Pagnoni, A., Sarti, E., and Pietrogrande, M. C.: Urban PM<sub>2.5</sub> oxidative potential: Importance of chemical  
911 species and comparison of two spectrophotometric cell-free assays, *Environmental Pollution*, 219, 72-79,  
912 10.1016/j.envpol.2016.09.047, 2016.

913 Wang, Y., Plewa, M. J., Mukherjee, U. K., and Verma, V.: Assessing the cytotoxicity of ambient particulate matter  
914 (PM) using Chinese hamster ovary (CHO) cells and its relationship with the PM chemical composition and oxidative  
915 potential, *Atmospheric Environment*, 179, 132-141, 10.1016/j.atmosenv.2018.02.025, 2018.

916 Weber, S., Uzu, G., Calas, A., Chevrier, F., Besombes, J.-L., Charron, A., Salameh, D., Ježek, I., Močnik, G., and  
917 Jaffrezo, J.-L.: An apportionment method for the oxidative potential of atmospheric particulate matter sources:  
918 application to a one-year study in Chamonix, France, *Atmospheric Chemistry and Physics*, 18, 9617-9629, 2018.

919 Weber, S., Uzu, G., Favez, O., Borlaza, L. J., Calas, A., Salameh, D., Chevrier, F., Allard, J., Besombes, J.-L., and  
920 Albinet, A.: Source apportionment of atmospheric PM 10 Oxidative Potential: synthesis of 15 year-round urban  
921 datasets in France, *Atmospheric Chemistry and Physics Discussions*, 1-38, 2021.

922 Wei, J., Yu, H., Wang, Y., and Verma, V.: Complexation of iron and copper in ambient particulate matter and its  
923 effect on the oxidative potential measured in a surrogate lung fluid, *Environmental Science & Technology*, 53, 1661-  
924 1671, 2018.

925 Weichenthal, S., Lavigne, E., Evans, G., Pollitt, K., and Burnett, R. T.: Ambient PM<sub>2.5</sub> and risk of emergency room  
926 visits for myocardial infarction: impact of regional PM<sub>2.5</sub> oxidative potential: a case-crossover study, *Environmental*  
927 *Health*, 15, 46, 10.1186/s12940-016-0129-9, 2016a.

928 Weichenthal, S., Shekarrizfard, M., Traub, A., Kulka, R., Al-Rijleh, K., Anowar, S., Evans, G., and Hatzopoulou, M.:  
929 Within-city spatial variations in multiple measures of PM<sub>2.5</sub> oxidative potential in Toronto, Canada, *Environmental*  
930 *Science & Technology*, 53, 2799-2810, 2019.

931 Weichenthal, S. A., Lavigne, E., Evans, G. J., Godri Pollitt, K. J., and Burnett, R. T.: Fine particulate matter and  
932 emergency room visits for respiratory illness. Effect modification by oxidative potential, *American Journal of*  
933 *Respiratory and Critical Care Medicine*, 194, 577-586, 2016b.

934 Wessels, A., Birmili, W., Albrecht, C., Hellack, B., Jermann, E., Wick, G., Harrison, R. M., and Schins, R. P.: Oxidant  
935 generation and toxicity of size-fractionated ambient particles in human lung epithelial cells, *Environmental Science*  
936 *& Technology*, 44, 3539-3545, 2010.

937 Xiang, S., Yu, Y. T., Hu, Z., and Noll, K. E.: Characterization of dispersion and ultrafine-particle emission factors  
938 based on near-roadway monitoring Part II: Heavy duty vehicles, *Aerosol and Air Quality Research*, 19, 2421-2431,  
939 2019.

940 Xing, Y.-F., Xu, Y.-H., Shi, M.-H., and Lian, Y.-X.: The impact of PM<sub>2.5</sub> on the human respiratory system, *Journal*  
941 *of Thoracic Disease*, 8, E69-E74, 2016.

942 Xiong, Q., Yu, H., Wang, R., Wei, J., and Verma, V.: Rethinking the dithiothreitol-based particulate matter oxidative  
943 potential: measuring dithiothreitol consumption versus reactive oxygen species generation, *Environmental Science &*  
944 *Technology*, 51, 6507-6514, 10.1021/acs.est.7b01272, 2017.

945 Xu, Z., Xu, X., Zhong, M., Hotchkiss, I. P., Lewandowski, R. P., Wagner, J. G., Bramble, L. A., Yang, Y., Wang, A.,  
946 and Harkema, J. R.: Ambient particulate air pollution induces oxidative stress and alterations of mitochondria and  
947 gene expression in brown and white adipose tissues, *Particle and Fibre Toxicology*, 8, 1-14, 2011.

948 Yan, Z., Wang, J., Li, J., Jiang, N., Zhang, R., Yang, W., Yao, W., and Wu, W.: Oxidative stress and endocytosis are  
949 involved in upregulation of interleukin-8 expression in airway cells exposed to PM<sub>2.5</sub>, *Environmental Toxicology*, 31,  
950 1869-1878, 10.1002/tox.22188, 2016.

951 Yang, A., Jedynska, A., Hellack, B., Kooter, I., Hoek, G., Brunekreef, B., Kuhlbusch, T. A., Cassee, F. R., and Janssen,  
952 N. A.: Measurement of the oxidative potential of PM<sub>2.5</sub> and its constituents: The effect of extraction solvent and filter  
953 type, *Atmospheric Environment*, 83, 35-42, 10.1016/j.atmosenv.2013.10.049, 2014.

954 Yang, A., Hellack, B., Leseman, D., Brunekreef, B., Kuhlbusch, T. A., Cassee, F. R., Hoek, G., and Janssen, N. A.:  
955 Temporal and spatial variation of the metal-related oxidative potential of PM<sub>2.5</sub> and its relation to PM<sub>2.5</sub> mass and  
956 elemental composition, *Atmospheric Environment*, 102, 62-69, 2015a.

957 Yang, A., Wang, M., Eeftens, M., Beelen, R., Dons, E., Leseman, D. L., Brunekreef, B., Cassee, F. R., Janssen, N. A.,  
958 and Hoek, G.: Spatial variation and land use regression modeling of the oxidative potential of fine particles,  
959 *Environmental Health Perspectives*, 123, 1187-1192, 2015b.

960 Yang, A., Janssen, N. A., Brunekreef, B., Cassee, F. R., Hoek, G., and Gehring, U.: Children's respiratory health and  
961 oxidative potential of PM<sub>2.5</sub>: the PIAMA birth cohort study, *Occupational & Environmental Medicine*, 73, 154-160,  
962 10.1136/oemed-2015-103175, 2016.

963 Yu, H., Wei, J., Cheng, Y., Subedi, K., and Verma, V.: Synergistic and antagonistic interactions among the particulate  
964 matter components in generating reactive oxygen species based on the dithiothreitol assay, *Environmental Science &*  
965 *Technology*, 52, 2261-2270, 10.1021/acs.est.7b04261, 2018.

966 Yu, H., Puthussery, J. V., and Verma, V.: A semi-automated multi-endpoint reactive oxygen species activity analyzer  
967 (SAMERA) for measuring the oxidative potential of ambient PM<sub>2.5</sub> aqueous extracts, *Aerosol Science and Technology*,  
968 54, 304-320, 2020.

969 Yu, S., Liu, W., Xu, Y., Yi, K., Zhou, M., Tao, S., and Liu, W.: Characteristics and oxidative potential of atmospheric  
970 PM<sub>2.5</sub> in Beijing: Source apportionment and seasonal variation, *Science of the Total Environment*, 650, 277-287, 2019.

971 Zhang, Y., Schauer, J. J., Shafer, M. M., Hannigan, M. P., and Dutton, S. J.: Source apportionment of *in vitro* reactive  
972 oxygen species bioassay activity from atmospheric particulate matter, *Environmental Science & Technology*, 42,  
973 7502-7509, 10.1021/es800126y, 2008.

974 Zhou, J., Ito, K., Lall, R., Lippmann, M., and Thurston, G.: Time-series analysis of mortality effects of fine particulate  
975 matter components in Detroit and Seattle, *Environmental Health Perspectives*, 119, 461-466, 2011.

976 Zuo, L., Otenbaker, N. P., Rose, B. A., and Salisbury, K. S.: Molecular mechanisms of reactive oxygen species-related  
977 pulmonary inflammation and asthma, *Molecular Immunology*, 56, 57-63,  
978 <https://doi.org/10.1016/j.molimm.2013.04.002>, 2013.

1 **Figures and Tables**

2 **Table 1.** Averages and ( $\pm$  standard deviation) of OP from various control groups (N = 10) analyzed by SAMERA.

| Endpoint             | Unit                     | Negative control                    |                                   | Positive control                    |                                   |
|----------------------|--------------------------|-------------------------------------|-----------------------------------|-------------------------------------|-----------------------------------|
|                      |                          | Average ( $\pm$ standard deviation) | Chemical used as positive control | Average ( $\pm$ standard deviation) | Coefficient of variation (CoV, %) |
| OP <sup>AA</sup>     | $\mu\text{M}/\text{min}$ | 0.18 $\pm$ 0.07                     | 1 $\mu\text{M}$ Cu                | 0.34 $\pm$ 0.04                     | 11.8                              |
| OP <sup>GSH</sup>    | $\mu\text{M}/\text{min}$ | 0.26 $\pm$ 0.06                     | 1 $\mu\text{M}$ Cu                | 0.77 $\pm$ 0.02                     | 2.6                               |
| OP <sup>OH-SLF</sup> | $\text{nM}/\text{min}$   | 7.69 $\pm$ 1.37                     | 2 $\mu\text{M}$ Fe                | 13.80 $\pm$ 0.70                    | 5.1                               |
| OP <sup>DTT</sup>    | $\mu\text{M}/\text{min}$ | 0.48 $\pm$ 0.07                     | 0.2 $\mu\text{M}$ PQ              | 1.84 $\pm$ 0.02                     | 1.1                               |
| OP <sup>OH-DTT</sup> | $\text{nM}/\text{min}$   | 0.55 $\pm$ 0.07                     | 0.2 $\mu\text{M}$ 5-H-1,4-NQ      | 15.45 $\pm$ 1.19                    | 7.7                               |

3

4 **Table 2.** Seasonal averages ( $\pm$  standard deviation) of PM<sub>2.5</sub> mass concentrations (unit:  $\mu\text{g}/\text{m}^3$ ) at our sampling sites.

|             | CHI            | STL            | IND            | CMP            | BON            |
|-------------|----------------|----------------|----------------|----------------|----------------|
| Summer 2018 | 11.2 $\pm$ 3.2 | 14.7 $\pm$ 3.4 | 11.9 $\pm$ 3.5 | 11.4 $\pm$ 3.9 | 10.4 $\pm$ 2.0 |
| Fall 2018   | 10.9 $\pm$ 3.4 | 13.1 $\pm$ 3.7 | 11.5 $\pm$ 4.2 | 7.5 $\pm$ 4.3  | 9.7 $\pm$ 3.5  |
| Winter 2018 | 14.6 $\pm$ 3.6 | 11.8 $\pm$ 2.8 | 11.0 $\pm$ 2.7 | 10.0 $\pm$ 3.0 | 8.6 $\pm$ 3.0  |
| Spring 2019 | 12.6 $\pm$ 4.2 | 13.8 $\pm$ 4.0 | 12.2 $\pm$ 2.1 | 11.6 $\pm$ 3.1 | 9.2 $\pm$ 2.3  |

5

6 **Table 3.** Pearson's correlation coefficient (r) and the associated levels of significance (P) between water-soluble and  
 7 methanol-soluble OPv for different endpoints at five sampling sites. Correlations with  $r > 0.60$  are shown in **bold**.  
 8 Asterisks - \* and \*\* indicate significant ( $P < 0.05$ ) and highly significant ( $P < 0.01$ ) correlations, respectively.

| Site | Pearson's r/significance level (P) for OP endpoints |                   |                      |                   |                      |
|------|-----------------------------------------------------|-------------------|----------------------|-------------------|----------------------|
|      | OP <sup>AA</sup>                                    | OP <sup>GSH</sup> | OP <sup>OH-SLF</sup> | OP <sup>DTT</sup> | OP <sup>OH-DTT</sup> |
| CHI  | 0.09                                                | 0.34*             | 0.53**               | 0.55**            | 0.40**               |
| STL  | 0.24                                                | 0.11              | 0.18                 | 0.28              | 0.38**               |
| IND  | 0.24                                                | 0.40**            | 0.33*                | 0.43**            | 0.21                 |
| CMP  | 0.42**                                              | <b>0.63**</b>     | 0.10                 | <b>0.74**</b>     | 0.58**               |
| BON  | 0.60**                                              | 0.52**            | 0.41**               | <b>0.68**</b>     | 0.54**               |

9

10 **Table 4.** Pearson's r, the associated levels of significance (P) and slope for simple linear regression of water-soluble  
 11 OPv versus PM<sub>2.5</sub> mass concentration at five sampling sites. Correlations with  $r > 0.60$  are shown in **bold**. All slope  
 12 values are in *italic*. Asterisks - \* and \*\* indicate significant ( $P < 0.05$ ) and highly significant ( $P < 0.01$ ) correlations,  
 13 respectively.

14 (a) Water-soluble OP

|                      |                                                  | CHI           | STL          | IND          | CMP           | BON           |
|----------------------|--------------------------------------------------|---------------|--------------|--------------|---------------|---------------|
| OP <sup>AA</sup>     | Pearson's r/P                                    | -0.02         | 0.33*        | 0.19         | 0.54**        | 0.26          |
|                      | <i>Slope (nmol/min/<math>\mu\text{g}</math>)</i> | <i>0.000</i>  | <i>0.005</i> | <i>0.004</i> | <i>0.031</i>  | <i>0.007</i>  |
| OP <sup>GSH</sup>    | Pearson's r/P                                    | 0.45**        | 0.34*        | 0.45**       | <b>0.72**</b> | 0.38*         |
|                      | <i>Slope (nmol/min/<math>\mu\text{g}</math>)</i> | <i>0.005</i>  | <i>0.003</i> | <i>0.005</i> | <i>0.016</i>  | <i>0.005</i>  |
| OP <sup>OH-SLF</sup> | Pearson's r/P                                    | 0.09          | 0.26         | 0.37**       | 0.43**        | 0.24          |
|                      | <i>Slope (pmol/min/<math>\mu\text{g}</math>)</i> | <i>0.041</i>  | <i>0.107</i> | <i>0.128</i> | <i>0.277</i>  | <i>0.165</i>  |
| OP <sup>DTT</sup>    | Pearson's r/P                                    | <b>0.62**</b> | 0.27         | 0.55**       | <b>0.82**</b> | <b>0.63**</b> |
|                      | <i>Slope (nmol/min/<math>\mu\text{g}</math>)</i> | <i>0.013</i>  | <i>0.005</i> | <i>0.013</i> | <i>0.020</i>  | <i>0.015</i>  |
| OP <sup>OH-DTT</sup> | Pearson's r/P                                    | 0.24          | 0.60**       | 0.37**       | 0.51**        | 0.45**        |
|                      | <i>Slope (pmol/min/<math>\mu\text{g}</math>)</i> | <i>0.043</i>  | <i>0.062</i> | <i>0.051</i> | <i>0.048</i>  | <i>0.052</i>  |

15

16 (b) Methanol-soluble OP

|                      |                     | CHI    | STL    | IND           | CMP           | BON           |
|----------------------|---------------------|--------|--------|---------------|---------------|---------------|
| OP <sup>AA</sup>     | Pearson's r/P       | 0.55** | 0.12   | 0.52**        | <b>0.64**</b> | <b>0.61**</b> |
|                      | Slope (nmol/min/μg) | 0.010  | 0.002  | 0.010         | 0.011         | 0.012         |
| OP <sup>GSH</sup>    | Pearson's r/P       | 0.53** | 0.38** | 0.51**        | <b>0.73**</b> | <b>0.63**</b> |
|                      | Slope (nmol/min/μg) | 0.007  | 0.005  | 0.007         | 0.012         | 0.009         |
| OP <sup>OH-SLF</sup> | Pearson's r/P       | 0.19   | 0.34*  | 0.45**        | 0.48**        | 0.52**        |
|                      | Slope (pmol/min/μg) | 0.264  | 0.514  | 0.666         | 0.576         | 0.735         |
| OP <sup>DTT</sup>    | Pearson's r/P       | 0.54** | 0.49** | <b>0.61**</b> | <b>0.79**</b> | <b>0.61**</b> |
|                      | Slope (nmol/min/μg) | 0.017  | 0.016  | 0.019         | 0.028         | 0.022         |
| OP <sup>OH-DTT</sup> | Pearson's r/P       | 0.25   | 0.44*  | 0.51**        | 0.43**        | 0.50**        |
|                      | Slope (pmol/min/μg) | 0.072  | 0.079  | 0.143         | 0.075         | 0.165         |

17

18 **Table 5.** Pearson's correlation coefficient (r) and the associated level of significance (P) among various endpoints of  
 19 OPv measured at five sampling sites. The values below the diagonal are for water-soluble OPv, while above are for  
 20 methanol-soluble OPv. Correlations with r > 0.60 are shown in bold. Asterisks - \* and \*\* indicate significant (P <  
 21 0.05) and highly significant (P < 0.01) correlations, respectively.

22 (a) CHI

| OP endpoint          | OP <sup>AA</sup> | OP <sup>GSH</sup> | OP <sup>OH-SLF</sup> | OP <sup>DTT</sup> | OP <sup>OH-DTT</sup> |
|----------------------|------------------|-------------------|----------------------|-------------------|----------------------|
| OP <sup>AA</sup>     |                  | <b>0.66**</b>     | 0.60**               | <b>0.69**</b>     | 0.49**               |
| OP <sup>GSH</sup>    | 0.32*            |                   | 0.30                 | 0.45**            | 0.17                 |
| OP <sup>OH-SLF</sup> | 0.09             | 0.39**            |                      | 0.53**            | <b>0.82**</b>        |
| OP <sup>DTT</sup>    | 0.05             | 0.40**            | 0.40**               |                   | <b>0.64**</b>        |
| OP <sup>OH-DTT</sup> | 0.03             | 0.30              | 0.48**               | 0.18              |                      |
|                      | OP <sup>AA</sup> | OP <sup>GSH</sup> | OP <sup>OH-SLF</sup> | OP <sup>DTT</sup> | OP <sup>OH-DTT</sup> |

23 (b) STL

| OP endpoint          | OP <sup>AA</sup> | OP <sup>GSH</sup> | OP <sup>OH-SLF</sup> | OP <sup>DTT</sup> | OP <sup>OH-DTT</sup> |
|----------------------|------------------|-------------------|----------------------|-------------------|----------------------|
| OP <sup>AA</sup>     |                  | 0.40**            | 0.19                 | 0.50**            | 0.33*                |
| OP <sup>GSH</sup>    | 0.30             |                   | 0.13                 | 0.36*             | 0.23                 |
| OP <sup>OH-SLF</sup> | 0.51**           | 0.17              |                      | 0.17              | 0.42**               |
| OP <sup>DTT</sup>    | 0.28             | 0.29              | 0.22                 |                   | 0.57**               |
| OP <sup>OH-DTT</sup> | 0.40**           | 0.38**            | 0.53**               | 0.34*             |                      |
|                      | OP <sup>AA</sup> | OP <sup>GSH</sup> | OP <sup>OH-SLF</sup> | OP <sup>DTT</sup> | OP <sup>OH-DTT</sup> |

24 (c) IND

| OP endpoint          | OP <sup>AA</sup> | OP <sup>GSH</sup> | OP <sup>OH-SLF</sup> | OP <sup>DTT</sup> | OP <sup>OH-DTT</sup> |
|----------------------|------------------|-------------------|----------------------|-------------------|----------------------|
| OP <sup>AA</sup>     |                  | 0.57**            | 0.54**               | <b>0.62**</b>     | 0.57**               |
| OP <sup>GSH</sup>    | 0.37**           |                   | 0.59**               | 0.52**            | 0.55**               |
| OP <sup>OH-SLF</sup> | 0.32*            | 0.23              |                      | 0.44**            | <b>0.84**</b>        |
| OP <sup>DTT</sup>    | 0.17             | 0.42**            | 0.44**               |                   | 0.54**               |
| OP <sup>OH-DTT</sup> | 0.08             | 0.20              | 0.29*                | 0.15              |                      |
|                      | OP <sup>AA</sup> | OP <sup>GSH</sup> | OP <sup>OH-SLF</sup> | OP <sup>DTT</sup> | OP <sup>OH-DTT</sup> |

25



26 (d) CMP

| OP endpoint          | Pearson's r/significance level (P) for OP endpoints |                   |                      |                   |                      |
|----------------------|-----------------------------------------------------|-------------------|----------------------|-------------------|----------------------|
|                      | OP <sup>AA</sup>                                    | OP <sup>GSH</sup> | OP <sup>OH-SLF</sup> | OP <sup>DTT</sup> | OP <sup>OH-DTT</sup> |
| OP <sup>AA</sup>     |                                                     | 0.55**            | 0.46**               | <b>0.70**</b>     | 0.45**               |
| OP <sup>GSH</sup>    | <b>0.68**</b>                                       |                   | 0.30*                | <b>0.69**</b>     | 0.15                 |
| OP <sup>OH-SLF</sup> | <b>0.77**</b>                                       | <b>0.80**</b>     |                      | 0.37**            | <b>0.66**</b>        |
| OP <sup>DTT</sup>    | <b>0.80**</b>                                       | <b>0.73**</b>     | 0.58**               |                   | 0.35*                |
| OP <sup>OH-DTT</sup> | 0.02                                                | 0.26              | 0.15                 | 0.29*             |                      |
|                      | OP <sup>AA</sup>                                    | OP <sup>GSH</sup> | OP <sup>OH-SLF</sup> | OP <sup>DTT</sup> | OP <sup>OH-DTT</sup> |

27 (e) BON

| OP endpoint          | Pearson's r/significance level (P) for OP endpoints |                   |                      |                   |                      |
|----------------------|-----------------------------------------------------|-------------------|----------------------|-------------------|----------------------|
|                      | OP <sup>AA</sup>                                    | OP <sup>GSH</sup> | OP <sup>OH-SLF</sup> | OP <sup>DTT</sup> | OP <sup>OH-DTT</sup> |
| OP <sup>AA</sup>     |                                                     | <b>0.66**</b>     | <b>0.77**</b>        | <b>0.70**</b>     | <b>0.61**</b>        |
| OP <sup>GSH</sup>    | <b>0.85**</b>                                       |                   | <b>0.68**</b>        | 0.60**            | 0.53**               |
| OP <sup>OH-SLF</sup> | 0.57**                                              | <b>0.64**</b>     |                      | <b>0.69**</b>     | <b>0.78**</b>        |
| OP <sup>DTT</sup>    | 0.51**                                              | 0.57**            | 0.30                 |                   | <b>0.68**</b>        |
| OP <sup>OH-DTT</sup> | 0.19                                                | 0.31*             | 0.28                 | 0.32*             |                      |
|                      | OP <sup>AA</sup>                                    | OP <sup>GSH</sup> | OP <sup>OH-SLF</sup> | OP <sup>DTT</sup> | OP <sup>OH-DTT</sup> |

28

29

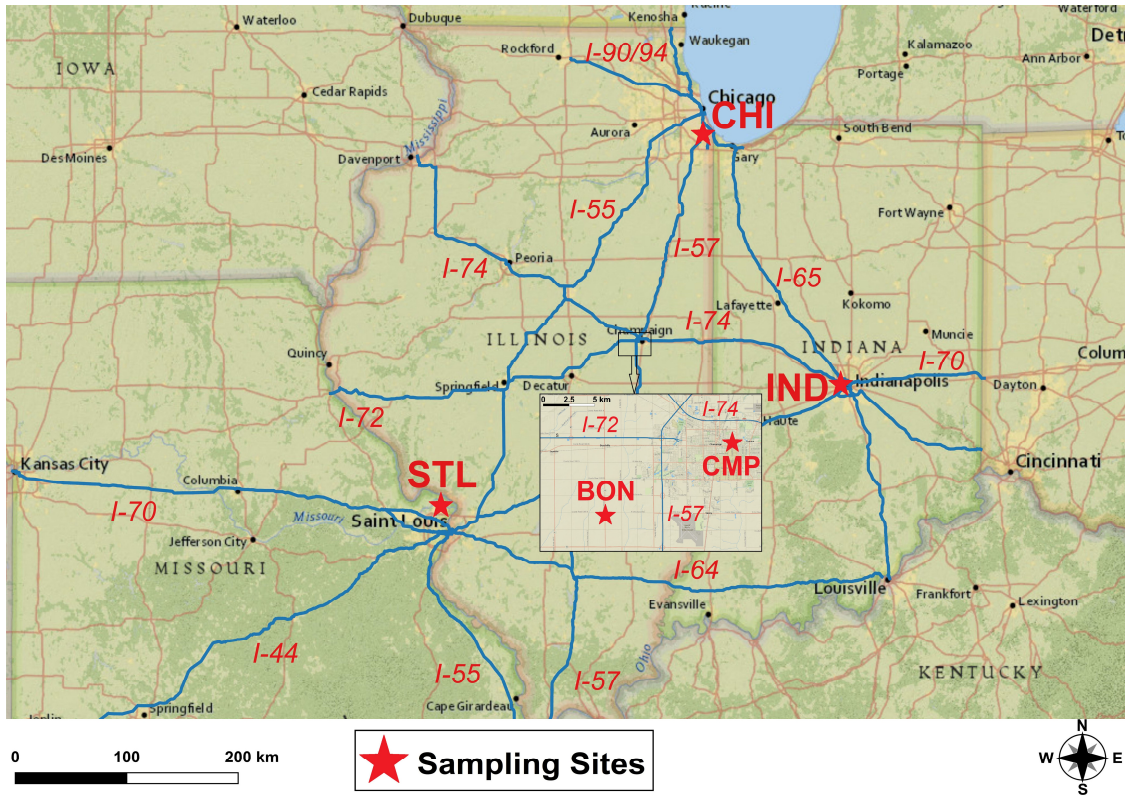

30  
31 **Figure 1.** Map for our five sampling sites in the Midwest US.

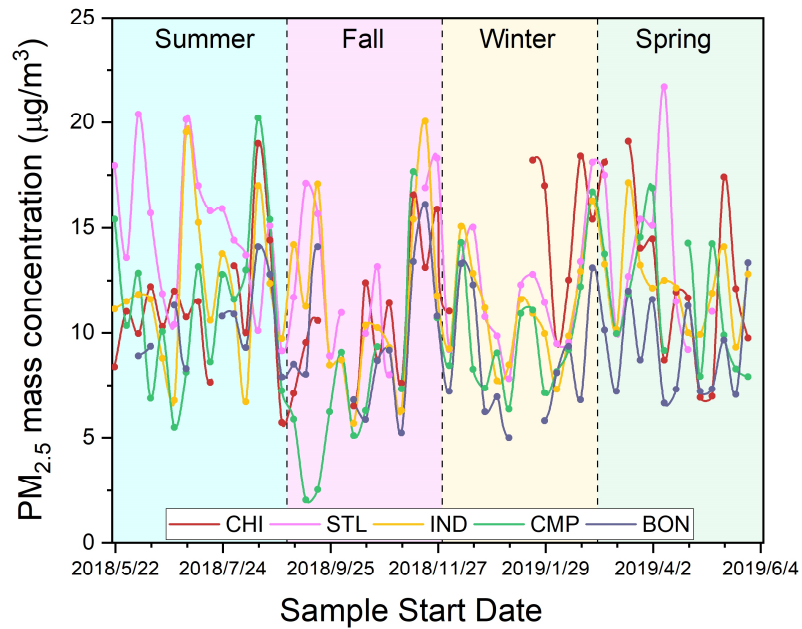

32  
33 **Figure 2.** Time series of PM<sub>2.5</sub> mass concentrations at our sampling sites in the Midwest US.

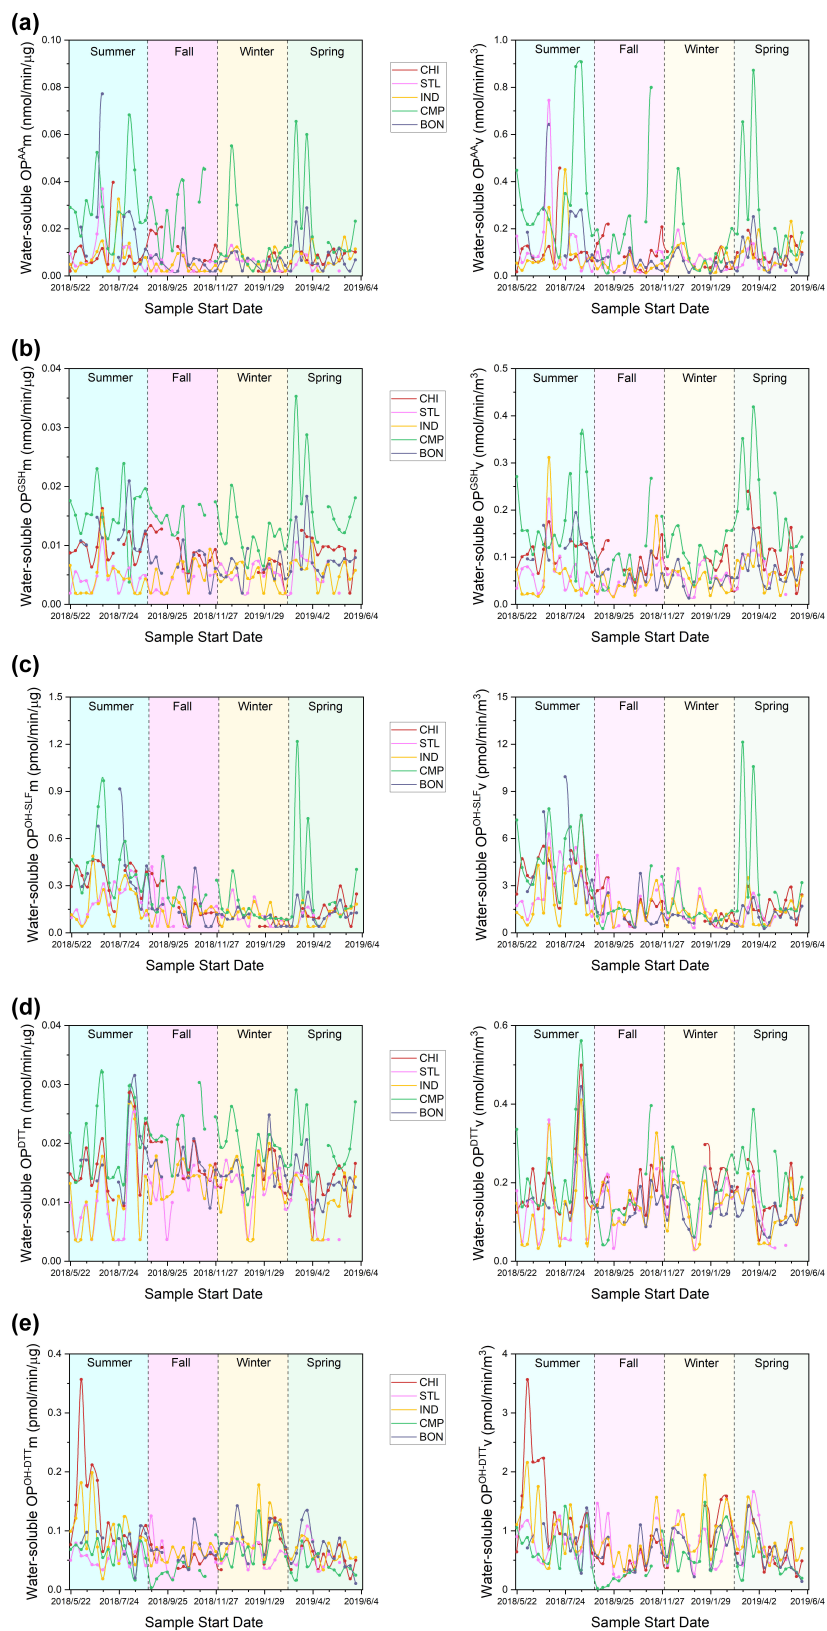

34

35 **Figure 3.** Time series of mass-(left) and volume-(right)normalized water-soluble OP activities for (a)  $OP^{AA}$ ,  
 36 (b)  $OP^{GSH}$ , (c)  $OP^{OH-SLF}$ , (d)  $OP^{DTT}$  and (e)  $OP^{OH-DTT}$  at our sampling sites.

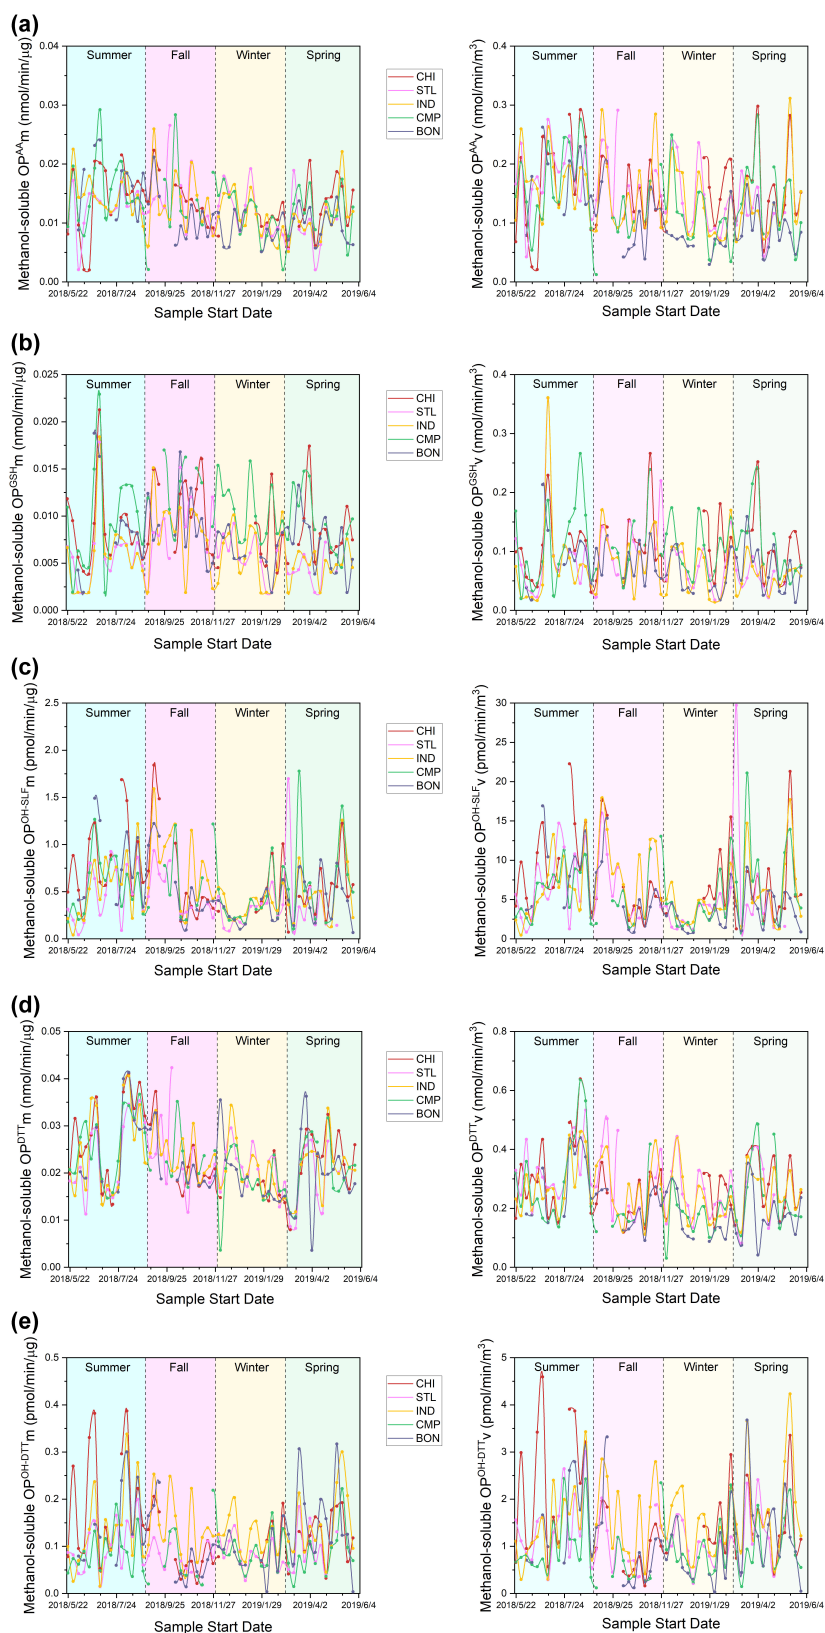

37

38 **Figure 4.** Time series of mass-(left) and volume-(right)normalized methanol-soluble OP activities for (a)  
 39  $OP^{AA}$ , (b)  $OP^{GSH}$ , (c)  $OP^{OH-SLF}$ , (d)  $OP^{DTT}$  and (e)  $OP^{OH-DTT}$  at our sampling sites.

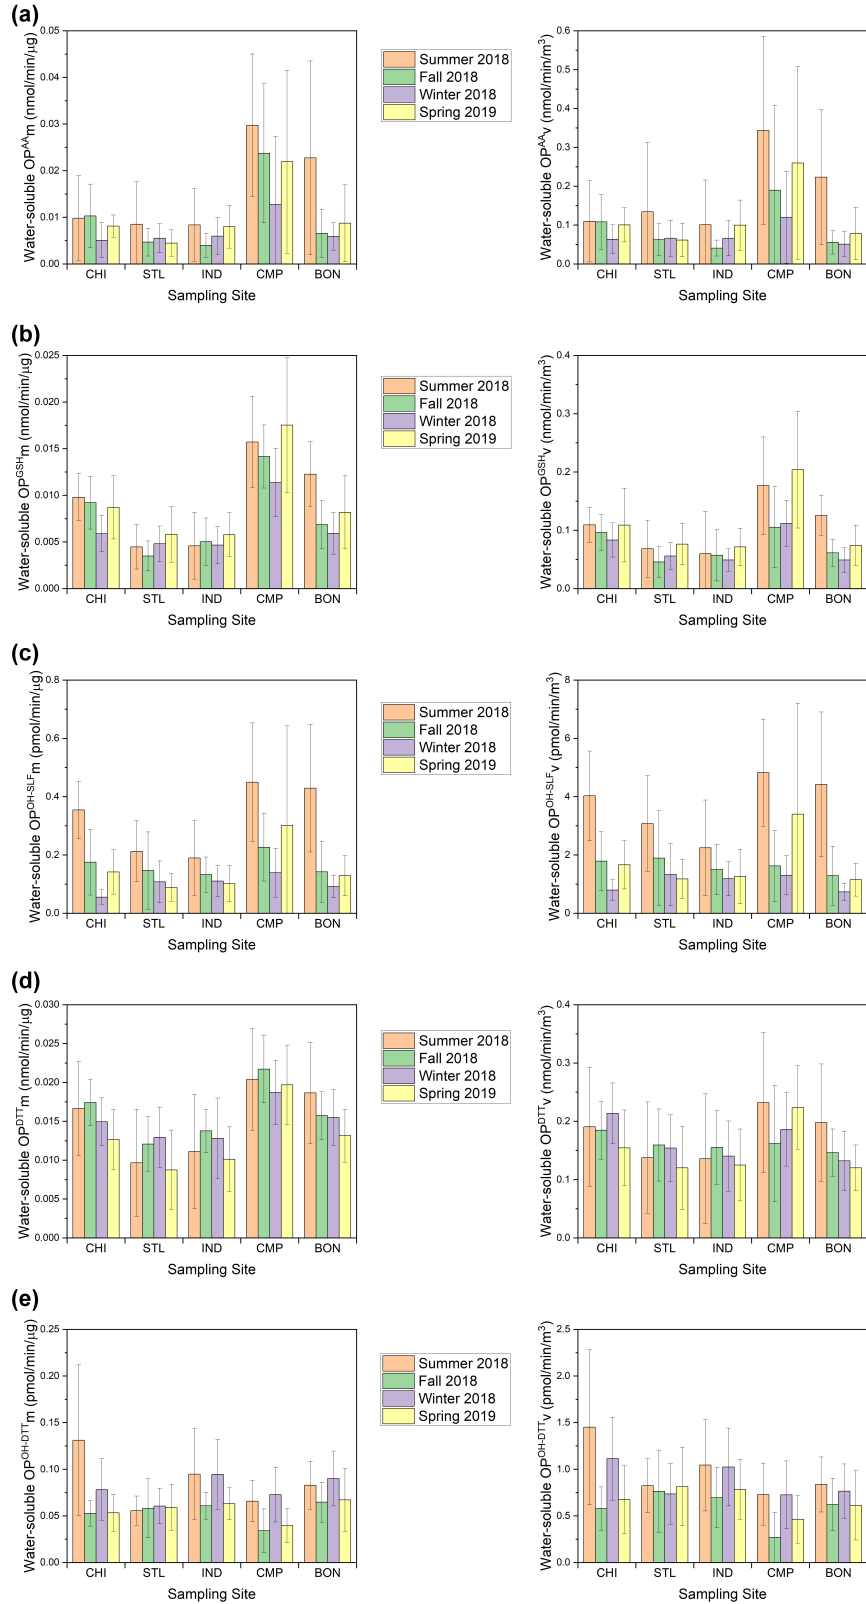

40

41 **Figure 5.** Seasonal averages of mass-(left) and volume-(right) normalized water-soluble OP activities for  
 42 (a) OP<sup>AA</sup>, (b) OP<sup>GSH</sup>, (c) OP<sup>OH-SLF</sup>, (d) OP<sup>DTT</sup> and (e) OP<sup>OH-DTT</sup> at our sampling sites.

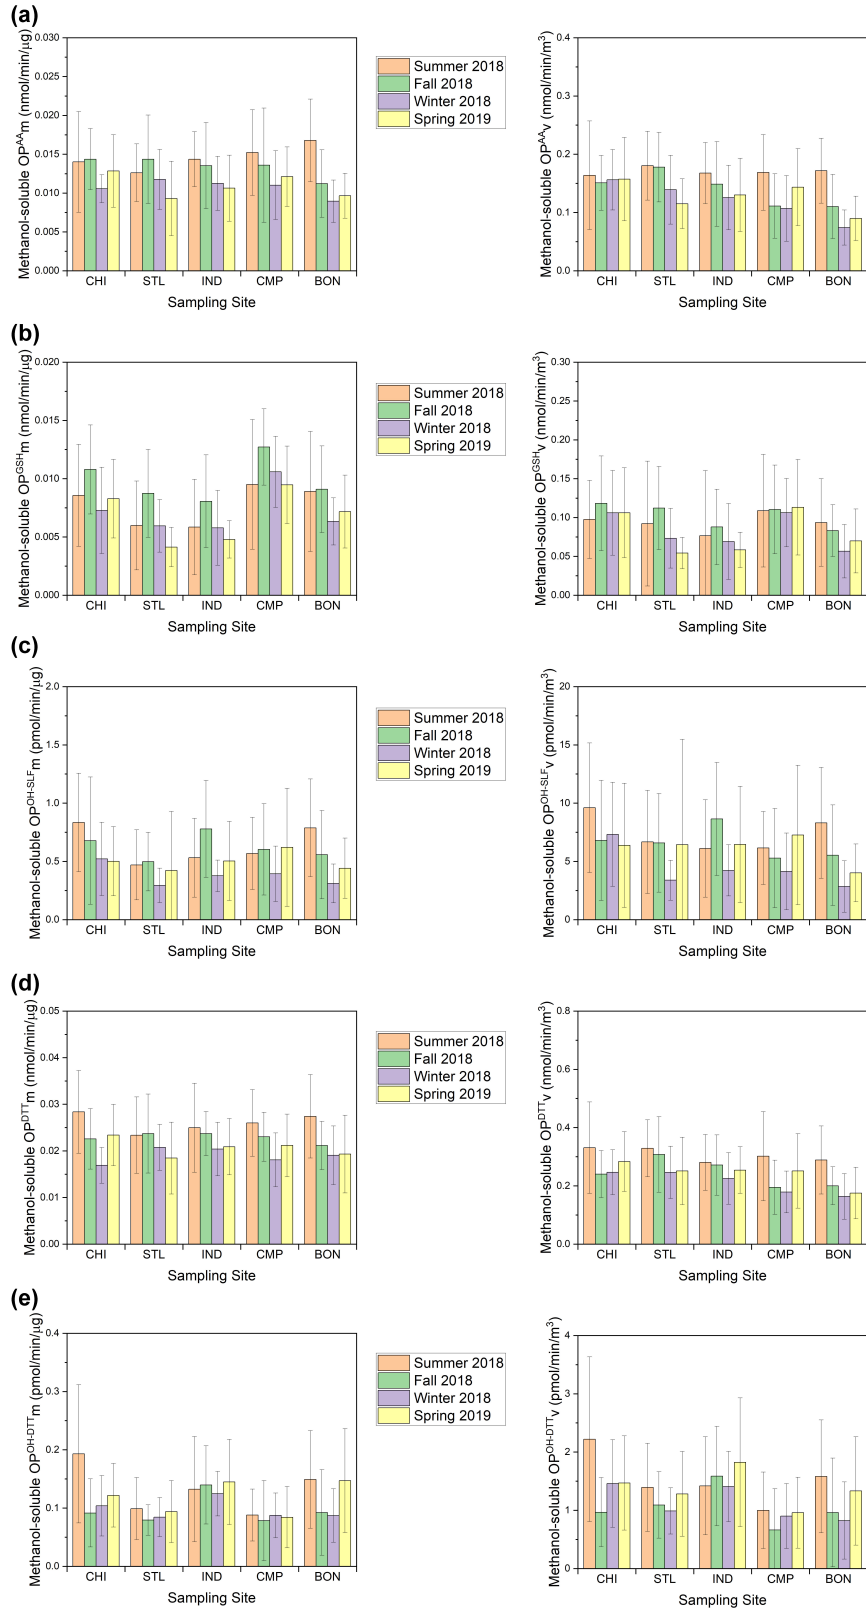

43

44 **Figure 6.** Seasonal averages of mass-(left) and volume-(right) normalized methanol-soluble OP activities  
 45 for (a) OP<sup>AA</sup>, (b) OP<sup>GSH</sup>, (c) OP<sup>OH-SLF</sup>, (d) OP<sup>DTT</sup> and (e) OP<sup>OH-DTT</sup> at our sampling sites.

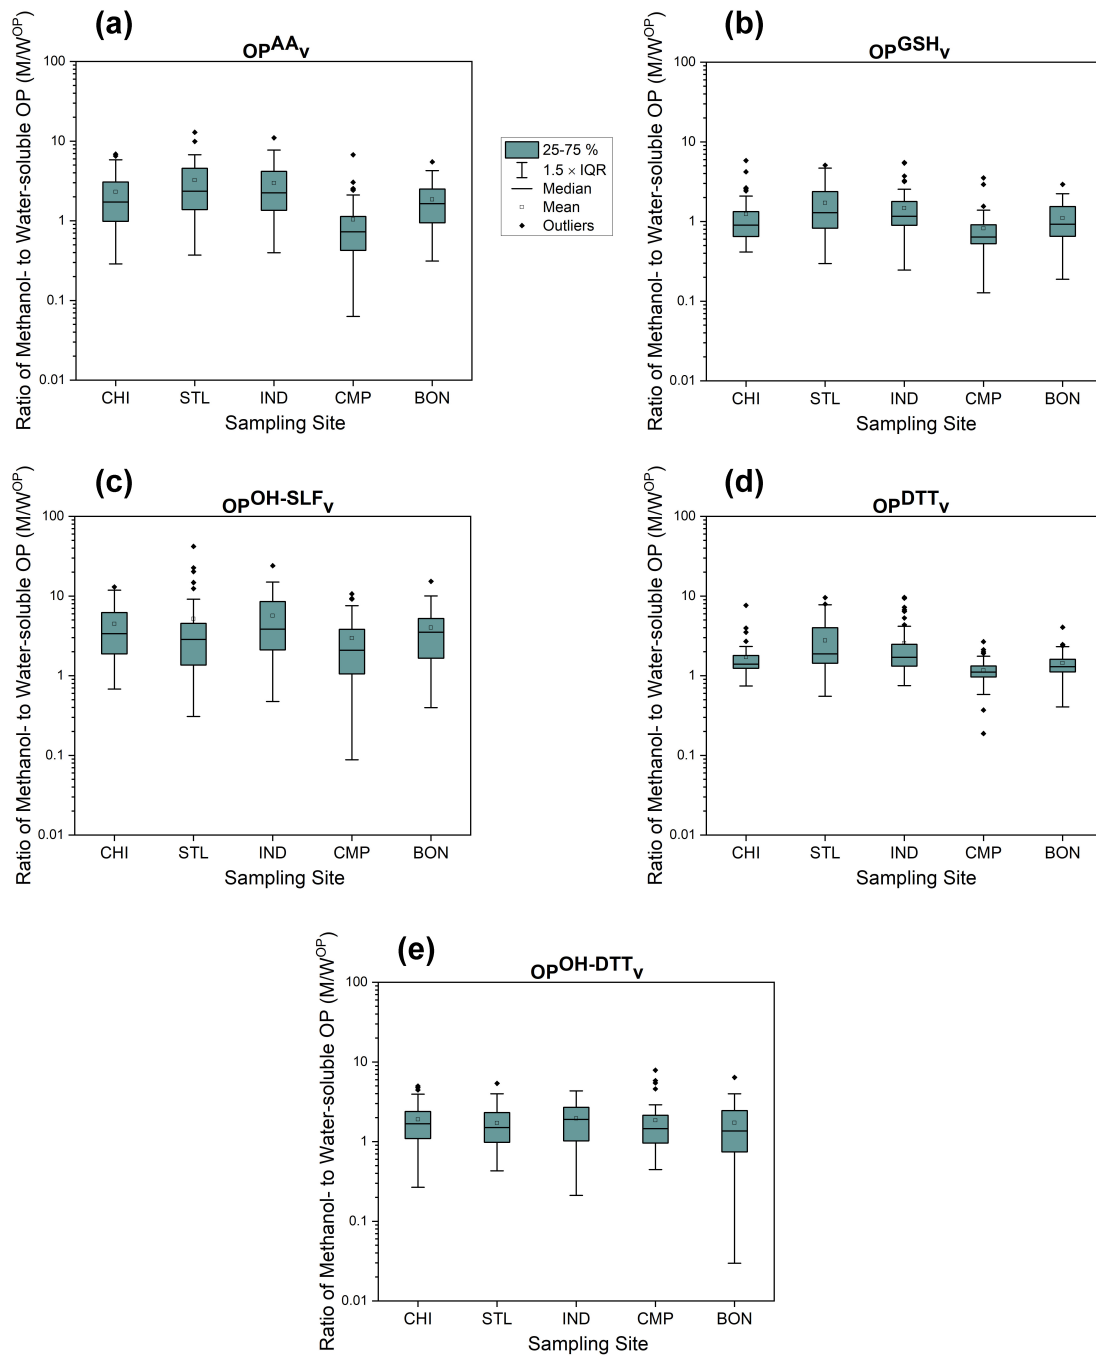

46

47 **Figure 7.** Ratio of methanol-soluble OP<sub>v</sub> to water-soluble OP<sub>v</sub> ( $M/W^{OP}$ ) for (a)  $OP^{AA}_v$ , (b)  $OP^{GSH}_v$ , (c)  
 48  $OP^{OH-SLF}_v$ , (d)  $OP^{DTT}_v$ , and (e)  $OP^{OH-DTT}_v$  at five sampling sites.

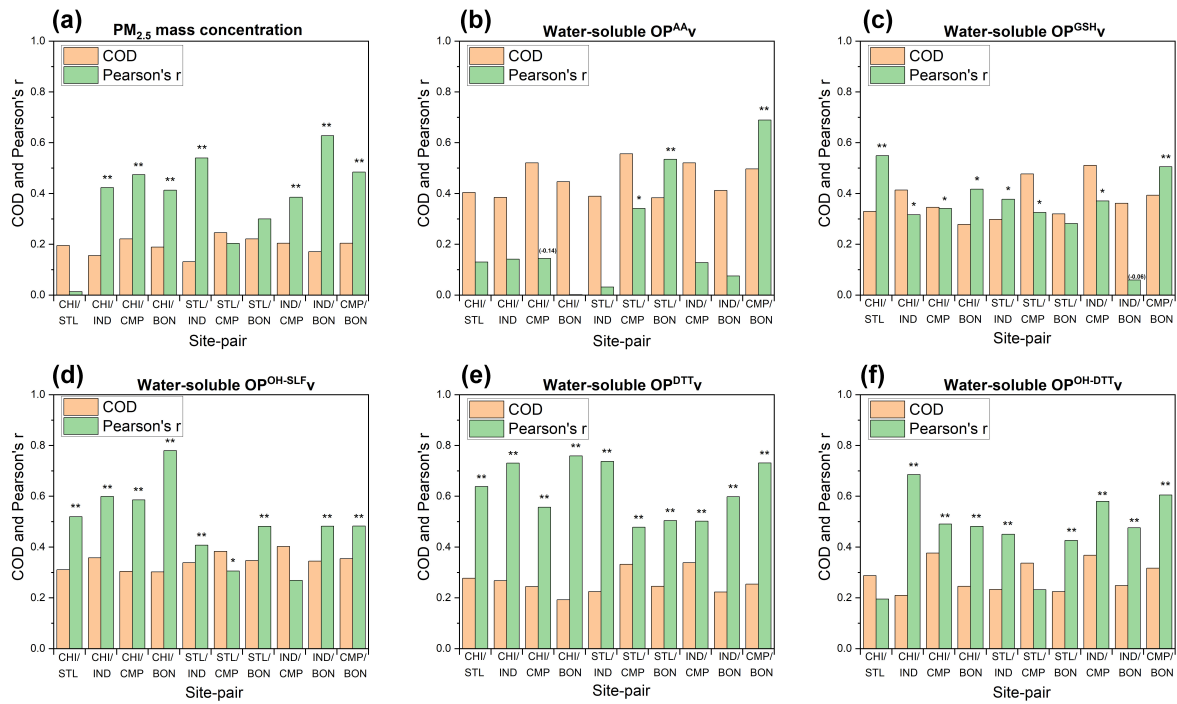

49

50 **Figure 8.** Coefficient of divergence (CoD) and Pearson's r for site-to-site comparison of (a)  $PM_{2.5}$  mass  
 51 and water-soluble OP activities: (b)  $OP^{AA}_v$ , (c)  $OP^{GSH}_v$ , (d)  $OP^{OH-SLF}_v$ , (e)  $OP^{DTT}_v$  and (f)  $OP^{OH-DTT}_v$ .  
 52 Asterisks - \* and \*\* on the bars of Pearson's r indicate significant ( $P < 0.05$ ) and very significant ( $P < 0.01$ )  
 53 correlations, respectively. Note: r for the correlations of  $OP^{AA}_v$  between CHI and CMP and for the  
 54 correlations of  $OP^{GSH}_v$  between IND and BON were negative (-0.14 and -0.06, respectively).

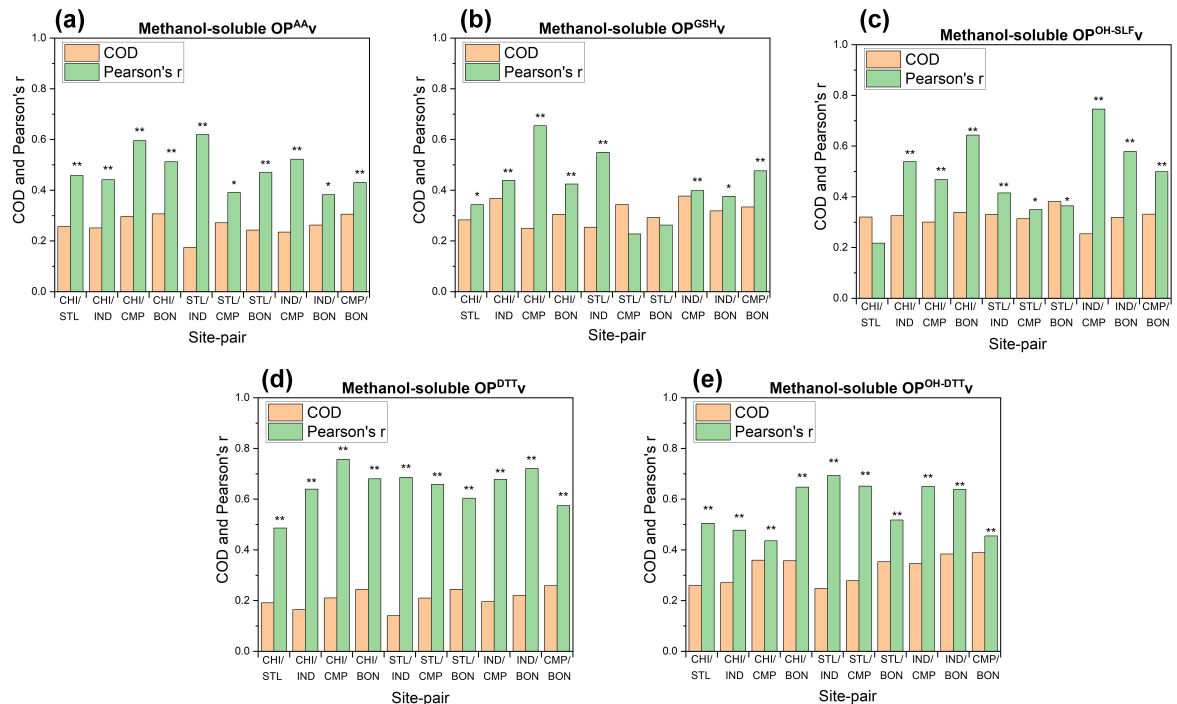

55

56 **Figure 9.** Coefficient of divergence (CoD) and Pearson's r for site-to-site comparison of methanol-soluble  
 57 OP activities: (a)  $OP^{AA}_v$ , (b)  $OP^{GSH}_v$ , (c)  $OP^{OH-SLF}_v$ , (d)  $OP^{DTT}_v$  and (e)  $OP^{OH-DTT}_v$ . Asterisks - \* and \*\* on  
 58 the bars of Pearson's r indicate significant ( $P < 0.05$ ) and very significant ( $P < 0.01$ ) correlations,  
 59 respectively.



*Supplemental Information of*

**Spatiotemporal Variability in the Oxidative Potential of Ambient Fine  
Particulate Matter in Midwestern United States**

**H. Yu et al.**

*Correspondence to:* V. Verma ([vverma@illinois.edu](mailto:vverma@illinois.edu))

Assistant Professor

Department of Civil and Environmental Engineering,

University of Illinois at Urbana-Champaign

205 N. Mathews Ave

Urbana, IL 61801

email: [vverma@illinois.edu](mailto:vverma@illinois.edu)

phone: (217) 265-6703

| Content            |    |
|--------------------|----|
| Number of pages    | 19 |
| Number of tables   | 7  |
| Number of figures  | 2  |
| Number of sections | 1  |

## Section S1. Comparison of five Hi-Vol samplers before and after the sampling campaign

Out of five samplers used in our study, two were old samplers (about 5 years old, used in various sampling campaigns) and three were brand new, which were bought from TISCH Environmental (Clevs, OH, US) a month before the sampling. These new samplers were factory calibrated and installed at three farther sites, i.e. Chicago (CHI), Indianapolis (IND) and St. Louis (STL). The other two old samplers were installed at Champaign (CMP) and Bondville (BON). For the sole purpose of this discussion, we will name them as CHI (N), IND (N), STL (N), CMP (O) and BON (O). Since the new samplers were factory calibrated, we had more confidence in them, therefore, we chose one of those samplers, i.e. CHI (N), as a reference and compared the responses of other two old samplers, i.e. CMP (O) and BON (O), by running them in pairs, i.e. first CHI (N) and CMP (O) pair, followed by CHI (N) and BON (O) pair, at a site in Urbana in April 2018 (due to some practical constraint, we couldn't run all three of them together). We collected 9 sets of 24-hours integrated Hi-Vol PM<sub>2.5</sub> samples on quartz filters from each pair, and analyzed them for the DTT assay using the same extraction and analysis procedure as used in our current study. The comparison of OP<sup>DTT</sup> response was conducted by the orthogonal fit regression analysis of OP<sup>DTT</sup><sub>v</sub> of PM<sub>2.5</sub> samples collected from CHI (N) and old samplers (**Figure S1**). The correlations between the old samplers and CHI (N) sampler were excellent ( $R^2 = 0.92 - 0.94$ ) with slopes almost equal to 1 (1.02 – 1.03), indicating that the samplers collect identical PM<sub>2.5</sub>, and had negligible internal difference in sample collection.

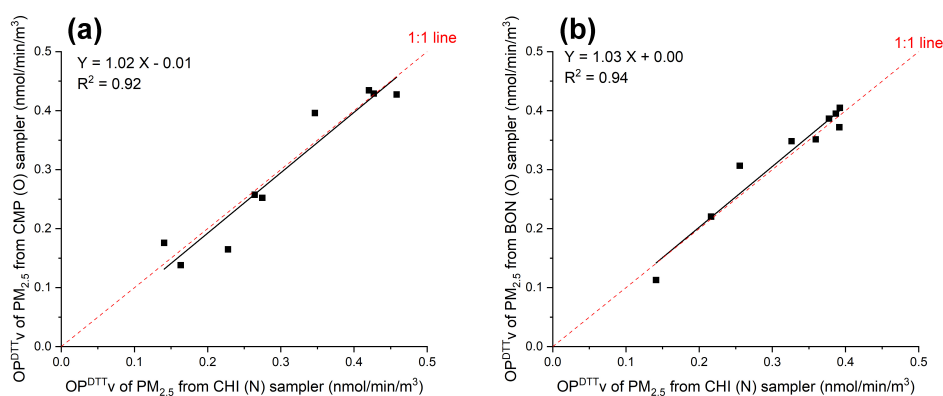

**Figure S1.** Comparison of OP<sup>DTT</sup> of PM<sub>2.5</sub> samples collected from CHI (N) sampler with old samplers: (a) CMP (O) sampler; (b) BON (O) sampler.

After the sampling campaign, we again moved the new samplers [i.e. CHI (N), STL (N) and IND (N)] back to CMP site, kept them side-by-side, and collected 9 Hi-Vol samples (24-hours integrated) from each sampler. All these samples were extracted in DI and analyzed for OP<sup>DTT</sup> in the same manner as used in our current study. The comparison of the reference sampler [i.e. CHI (N)] with other two new samplers was also conducted by orthogonal fit (Figure S2). Excellent correlations ( $R^2 = 0.93 - 0.95$ ) and consistent slopes (1.05 – 1.06, close to 1) both showed a good consistency of three new samplers.

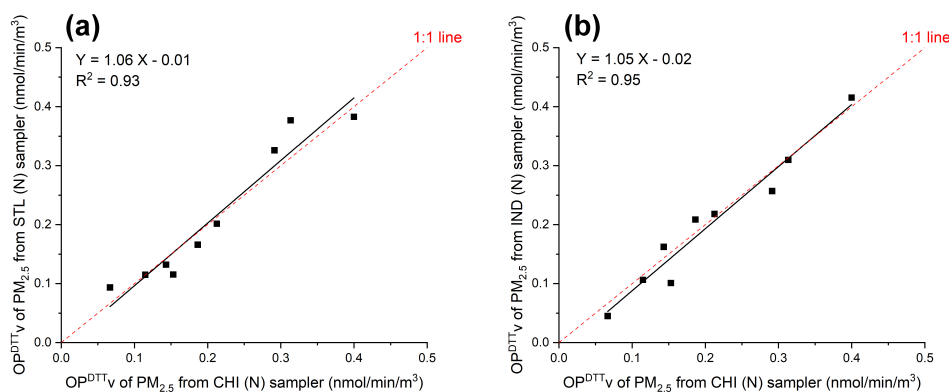

**Figure S2.** Comparison of OP<sup>DTT</sup> of PM<sub>2.5</sub> samples collected from CHI (N) sampler with other new samplers: (a) STL (N) sampler; (b) IND (N) sampler.

**Table S1.** Dates of samples collection at five sampling sites.

| Season         | Week count | Sampling period         | CHI | STL | IND | CMP | BON |
|----------------|------------|-------------------------|-----|-----|-----|-----|-----|
| Summer<br>2018 | 1          | 2018/5/22 – 2018/5/25   | ✓   | ✓   | ✓   | ✓   | ✗   |
|                | 2          | 2018/5/29 – 2018/6/1    | ✓   | ✓   | ✓   | ✓   | ✗   |
|                | 3          | 2018/6/5 – 2018/6/8     | ✓   | ✓   | ✓   | ✓   | ✓   |
|                | 4          | 2018/6/12 – 2018/6/15   | ✓   | ✓   | ✓   | ✓   | ✓   |
|                | 5          | 2018/6/19 – 2018/6/22   | ✓   | ✓   | ✓   | ✓   | ✗   |
|                | 6          | 2018/6/26 – 2018/6/29   | ✓   | ✓   | ✓   | ✓   | ✓   |
|                | 7          | 2018/7/3 – 2018/7/6     | ✓   | ✓   | ✓   | ✓   | ✓   |
|                | 8          | 2018/7/10 – 2018/7/13   | ✓   | ✓   | ✓   | ✓   | ✗   |
|                | 9          | 2018/7/17 – 2018/7/20   | ✓   | ✓   | ✓   | ✓   | ✗   |
|                | 10         | 2018/7/24 – 2018/7/27   | ✗   | ✓   | ✓   | ✓   | ✓   |
|                | 11         | 2018/7/31 – 2018/8/3    | ✓   | ✓   | ✓   | ✓   | ✓   |
|                | 12         | 2018/8/7 – 2018/8/10    | ✓   | ✓   | ✓   | ✓   | ✓   |
|                | 13         | 2018/8/14 – 2018/8/17   | ✓   | ✓   | ✓   | ✓   | ✓   |
|                | 14         | 2018/8/21 – 2018/8/24   | ✓   | ✓   | ✓   | ✓   | ✓   |
|                | 15         | 2018/8/28 – 2018/8/31   | ✓   | ✓   | ✓   | ✓   | ✓   |
| Fall 2018      | 16         | 2018/9/4 – 2018/9/7     | ✓   | ✓   | ✓   | ✓   | ✓   |
|                | 17         | 2018/9/11 – 2018/9/14   | ✓   | ✓   | ✓   | ✓   | ✓   |
|                | 18         | 2018/9/18 – 2018/9/21   | ✓   | ✓   | ✓   | ✓   | ✓   |
|                | 19         | 2018/9/25 – 2018/9/28   | ✗   | ✓   | ✓   | ✓   | ✗   |
|                | 20         | 2018/10/2 – 2018/10/5   | ✗   | ✓   | ✓   | ✓   | ✗   |
|                | 21         | 2018/10/9 – 2018/10/12  | ✓   | ✗   | ✓   | ✓   | ✓   |
|                | 22         | 2018/10/16 – 2018/10/19 | ✓   | ✓   | ✓   | ✓   | ✓   |
|                | 23         | 2018/10/23 – 2018/10/26 | ✓   | ✓   | ✓   | ✓   | ✓   |
|                | 24         | 2018/10/30 – 2018/11/2  | ✓   | ✓   | ✓   | ✗   | ✓   |
|                | 25         | 2018/11/6 – 2018/11/9   | ✓   | ✗   | ✓   | ✓   | ✓   |
|                | 26         | 2018/11/13 – 2018/11/16 | ✓   | ✗   | ✓   | ✓   | ✓   |
|                | 27         | 2018/11/20 – 2018/11/23 | ✓   | ✓   | ✓   | ✗   | ✓   |
|                | 28         | 2018/11/27 – 2018/11/30 | ✓   | ✓   | ✓   | ✓   | ✓   |
| Winter<br>2018 | 29         | 2018/12/4 – 2018/12/7   | ✓   | ✓   | ✓   | ✓   | ✓   |
|                | 30         | 2018/12/11 – 2018/12/14 | ✗   | ✓   | ✓   | ✓   | ✓   |
|                | 31         | 2018/12/18 – 2018/12/21 | ✗   | ✓   | ✓   | ✓   | ✓   |
|                | 32         | 2018/12/25 – 2018/12/28 | ✗   | ✓   | ✓   | ✓   | ✓   |
|                | 33         | 2019/1/1 – 2019/1/4     | ✗   | ✓   | ✓   | ✓   | ✓   |
|                | 34         | 2019/1/8 – 2019/1/11    | ✗   | ✓   | ✓   | ✓   | ✓   |
|                | 35         | 2019/1/15 – 2019/1/18   | ✗   | ✓   | ✓   | ✓   | ✗   |
|                | 36         | 2019/1/22 – 2019/1/25   | ✓   | ✓   | ✓   | ✓   | ✗   |
|                | 37         | 2019/1/29 – 2019/2/1    | ✓   | ✓   | ✓   | ✓   | ✓   |
|                | 38         | 2019/2/5 – 2019/2/8     | ✓   | ✓   | ✓   | ✓   | ✓   |
|                | 39         | 2019/2/12 – 2019/2/15   | ✓   | ✓   | ✓   | ✓   | ✓   |
|                | 40         | 2019/2/19 – 2019/2/22   | ✓   | ✓   | ✓   | ✓   | ✓   |
|                | 41         | 2019/2/26 – 2019/3/1    | ✓   | ✓   | ✓   | ✓   | ✓   |
| Spring<br>2019 | 42         | 2019/3/5 – 2019/3/8     | ✓   | ✓   | ✓   | ✓   | ✓   |
|                | 43         | 2019/3/12 – 2019/3/15   | ✗   | ✓   | ✓   | ✓   | ✓   |
|                | 44         | 2019/3/19 – 2019/3/22   | ✓   | ✓   | ✓   | ✓   | ✓   |
|                | 45         | 2019/3/26 – 2019/3/29   | ✓   | ✓   | ✓   | ✓   | ✓   |
|                | 46         | 2019/4/2 – 2019/4/5     | ✓   | ✓   | ✓   | ✓   | ✓   |
|                | 47         | 2019/4/9 – 2019/4/12    | ✓   | ✓   | ✓   | ✓   | ✓   |
|                | 48         | 2019/4/16 – 2019/4/19   | ✓   | ✓   | ✓   | ✗   | ✓   |
|                | 49         | 2019/4/23 – 2019/4/26   | ✓   | ✓   | ✓   | ✓   | ✓   |
|                | 50         | 2019/4/30 – 2019/5/3    | ✓   | ✗   | ✓   | ✓   | ✓   |
|                | 51         | 2019/5/7 – 2019/5/10    | ✓   | ✓   | ✓   | ✓   | ✓   |
|                | 52         | 2019/5/14 – 2019/5/17   | ✓   | ✗   | ✓   | ✓   | ✓   |
|                | 53         | 2019/5/21 – 2019/5/24   | ✓   | ✗   | ✓   | ✓   | ✓   |
|                | 54         | 2019/5/28 – 2019/5/31   | ✓   | ✗   | ✓   | ✓   | ✓   |

The symbol ✓ denotes the collection of a sample, and the symbol ✗ denotes no collection of the sample in that week (due to several reasons such as unfavorable weather conditions, broken sampler, etc.).

**Table S2.** Precision of SAMERA for methanol-soluble OP measurements compared with water-soluble OP measurements.

| Endpoint             | Unit                    | Average | Standard Deviation | CoV (%) | CoV (%) for the water-soluble PM <sub>2.5</sub> extract (Yu et al., 2020) |
|----------------------|-------------------------|---------|--------------------|---------|---------------------------------------------------------------------------|
| OP <sup>AA</sup>     | nmol/min/m <sup>3</sup> | 0.132   | 0.018              | 13.51   | 11.87                                                                     |
| OP <sup>GSH</sup>    | nmol/min/m <sup>3</sup> | 0.098   | 0.010              | 10.65   | 7.89                                                                      |
| OP <sup>OH-SLF</sup> | pmol/min/m <sup>3</sup> | 0.740   | 0.011              | 14.49   | 10.56                                                                     |
| OP <sup>DTT</sup>    | nmol/min/m <sup>3</sup> | 0.187   | 0.017              | 8.89    | 10.52                                                                     |
| OP <sup>OH-DTT</sup> | pmol/min/m <sup>3</sup> | 0.216   | 0.023              | 10.88   | 13.28                                                                     |

**Table S3.** Results of 1-way ANOVA test for assessing the temporal and spatial variability of PM<sub>2.5</sub> mass concentrations.

| Variability | Sampling Site/Season | F value | Significantly different group(s) |
|-------------|----------------------|---------|----------------------------------|
| Temporal    | CHI                  | 1.95    |                                  |
|             | STL                  | 1.79    |                                  |
|             | IND                  | 0.33    |                                  |
|             | CMP                  | 3.25*   | Fall 2018                        |
|             | BON                  | 0.82    |                                  |
| Spatial     | Summer 2018          | 3.48*   | STL                              |
|             | Fall 2018            | 3.13*   | CHI, STL, IND, CMP               |
|             | Winter 2018          | 5.01**  | CHI                              |
|             | Spring 2019          | 3.35*   | BON                              |

Asterisks – \* and \*\* indicate significant (P < 0.05) and highly significant (P < 0.01) differences, respectively.

**Table S4.** Results of 1-way ANOVA test for assessing the temporal and spatial variability of mass-normalized and volume-normalized OP endpoints for water-soluble PM<sub>2.5</sub> samples.

(a) Temporal variability

| Sampling Site                     | Endpoint                          | F value                                          | Significantly different group(s)                 |
|-----------------------------------|-----------------------------------|--------------------------------------------------|--------------------------------------------------|
| Chicago, IL<br>(CHI)              | OP <sup>AA</sup> <sub>m</sub>     | 1.12                                             |                                                  |
|                                   | OP <sup>AA</sup> <sub>v</sub>     | 0.69                                             |                                                  |
|                                   | OP <sup>GSH</sup> <sub>m</sub>    | 3.19*                                            | Summer 2018, Fall 2018, Spring 2019, Winter 2018 |
|                                   | OP <sup>GSH</sup> <sub>v</sub>    | 0.78                                             |                                                  |
|                                   | OP <sup>OH-SLF</sup> <sub>m</sub> | 21.84**                                          | Summer 2018, Fall 2018, Spring 2019, Winter 2018 |
|                                   | OP <sup>OH-SLF</sup> <sub>v</sub> | 17.72**                                          | Summer 2018, Fall 2018, Spring 2019, Winter 2018 |
|                                   | OP <sup>DTT</sup> <sub>m</sub>    | 2.67                                             | Summer 2018, Fall 2018, Spring 2019              |
|                                   | OP <sup>DTT</sup> <sub>v</sub>    | 1.03                                             |                                                  |
|                                   | OP <sup>OH-DTT</sup> <sub>m</sub> | 7.26**                                           | Summer 2018, Winter 2018, Fall 2018, Spring 2019 |
| OP <sup>OH-DTT</sup> <sub>v</sub> | 6.68**                            | Summer 2018, Fall 2018, Spring 2019              |                                                  |
| St. Louis, MO<br>(STL)            | OP <sup>AA</sup> <sub>m</sub>     | 1.37                                             |                                                  |
|                                   | OP <sup>AA</sup> <sub>v</sub>     | 1.48                                             |                                                  |
|                                   | OP <sup>GSH</sup> <sub>m</sub>    | 1.74                                             | Spring 2019, Fall 2018                           |
|                                   | OP <sup>GSH</sup> <sub>v</sub>    | 1.40                                             |                                                  |
|                                   | OP <sup>OH-SLF</sup> <sub>m</sub> | 4.25**                                           | Summer 2018, Winter 2018, Spring 2019            |
|                                   | OP <sup>OH-SLF</sup> <sub>v</sub> | 5.33**                                           | Summer 2018, Fall 2018, Winter 2018, Spring 2019 |
|                                   | OP <sup>DTT</sup> <sub>m</sub>    | 1.83                                             |                                                  |
|                                   | OP <sup>DTT</sup> <sub>v</sub>    | 0.56                                             |                                                  |
|                                   | OP <sup>OH-DTT</sup> <sub>m</sub> | 0.12                                             |                                                  |
| OP <sup>OH-DTT</sup> <sub>v</sub> | 0.17                              |                                                  |                                                  |
| Indianapolis,<br>IN (IND)         | OP <sup>AA</sup> <sub>m</sub>     | 2.02                                             | Summer 2018, Fall 2018                           |
|                                   | OP <sup>AA</sup> <sub>v</sub>     | 2.11                                             | Summer 2018, Spring 2019, Fall 2018              |
|                                   | OP <sup>GSH</sup> <sub>m</sub>    | 0.53                                             |                                                  |
|                                   | OP <sup>GSH</sup> <sub>v</sub>    | 0.49                                             |                                                  |
|                                   | OP <sup>OH-SLF</sup> <sub>m</sub> | 3.16*                                            | Summer 2018, Winter 2018, Spring 2019            |
|                                   | OP <sup>OH-SLF</sup> <sub>v</sub> | 2.75*                                            | Summer 2018, Winter 2018, Spring 2019            |
|                                   | OP <sup>DTT</sup> <sub>m</sub>    | 1.29                                             |                                                  |
|                                   | OP <sup>DTT</sup> <sub>v</sub>    | 0.33                                             |                                                  |
|                                   | OP <sup>OH-DTT</sup> <sub>m</sub> | 4.28**                                           | Summer 2018, Winter 2018, Fall 2018, Spring 2019 |
| OP <sup>OH-DTT</sup> <sub>v</sub> | 2.57                              | Summer 2018, Winter 2018, Fall 2018              |                                                  |
| Champaign, IL<br>(CMP)            | OP <sup>AA</sup> <sub>m</sub>     | 2.59                                             | Summer 2018, Winter 2018                         |
|                                   | OP <sup>AA</sup> <sub>v</sub>     | 2.77*                                            | Summer 2018, Winter 2018                         |
|                                   | OP <sup>GSH</sup> <sub>m</sub>    | 3.44*                                            | Spring 2019, Summer 2018, Winter 2018            |
|                                   | OP <sup>GSH</sup> <sub>v</sub>    | 4.92**                                           | Spring 2019, Summer 2018, Winter 2018, Fall 2018 |
|                                   | OP <sup>OH-SLF</sup> <sub>m</sub> | 5.47**                                           | Summer 2018, Fall 2018, Winter 2018              |
|                                   | OP <sup>OH-SLF</sup> <sub>v</sub> | 7.59**                                           | Summer 2018, Spring 2019, Fall 2018, Winter 2018 |
|                                   | OP <sup>DTT</sup> <sub>m</sub>    | 0.70                                             |                                                  |
|                                   | OP <sup>DTT</sup> <sub>v</sub>    | 1.55                                             |                                                  |
|                                   | OP <sup>OH-DTT</sup> <sub>m</sub> | 8.06**                                           | Summer 2018, Winter 2018, Fall 2018, Spring 2019 |
| OP <sup>OH-DTT</sup> <sub>v</sub> | 6.18**                            | Summer 2018, Winter 2018, Spring 2019, Fall 2018 |                                                  |
| Bondville, IL<br>(BON)            | OP <sup>AA</sup> <sub>m</sub>     | 5.26**                                           | Summer 2018, Spring 2019, Fall 2018, Winter 2018 |
|                                   | OP <sup>AA</sup> <sub>v</sub>     | 8.17**                                           | Summer 2018, Spring 2019, Fall 2018, Winter 2018 |
|                                   | OP <sup>GSH</sup> <sub>m</sub>    | 8.16**                                           | Summer 2018, Spring 2019, Fall 2018, Winter 2018 |
|                                   | OP <sup>GSH</sup> <sub>v</sub>    | 13.81**                                          | Summer 2018, Spring 2019, Fall 2018, Winter 2018 |
|                                   | OP <sup>OH-SLF</sup> <sub>m</sub> | 16.82**                                          | Summer 2018, Spring 2019, Fall 2018, Winter 2018 |
|                                   | OP <sup>OH-SLF</sup> <sub>v</sub> | 17.33**                                          | Summer 2018, Spring 2019, Fall 2018, Winter 2018 |
|                                   | OP <sup>DTT</sup> <sub>m</sub>    | 3.15*                                            | Summer 2018, Spring 2019                         |
|                                   | OP <sup>DTT</sup> <sub>v</sub>    | 3.37*                                            | Summer 2018, Winter 2018, Spring 2019            |
|                                   | OP <sup>OH-DTT</sup> <sub>m</sub> | 2.10                                             | Winter 2018, Fall 2018                           |
| OP <sup>OH-DTT</sup> <sub>v</sub> | 1.34                              |                                                  |                                                  |

## (b) Spatial variability

| Season                            | Endpoint                          | F value                 | Significantly different group(s) |
|-----------------------------------|-----------------------------------|-------------------------|----------------------------------|
| Summer 2018                       | OP <sup>AA</sup> <sub>m</sub>     | 8.60**                  | CMP, BON, CHI, STL, IND          |
|                                   | OP <sup>AA</sup> <sub>v</sub>     | 5.28**                  | CMP, CHI, STL, IND               |
|                                   | OP <sup>GSH</sup> <sub>m</sub>    | 28.41**                 | CMP, BON, CHI, STL, IND          |
|                                   | OP <sup>GSH</sup> <sub>v</sub>    | 9.30**                  | CMP, BON, CHI, STL, IND          |
|                                   | OP <sup>OH-SLF</sup> <sub>m</sub> | 8.60**                  | CHI, CMP, BON, STL, IND          |
|                                   | OP <sup>OH-SLF</sup> <sub>v</sub> | 4.83**                  | CMP, CHI, STL, IND               |
|                                   | OP <sup>DTT</sup> <sub>m</sub>    | 6.97**                  | CMP, STL, IND                    |
|                                   | OP <sup>DTT</sup> <sub>v</sub>    | 2.21                    | CMP, STL, IND                    |
|                                   | OP <sup>OH-DTT</sup> <sub>m</sub> | 5.92**                  | CHI, IND, CMP, BON, STL          |
| OP <sup>OH-DTT</sup> <sub>v</sub> | 4.70**                            | CHI, STL, IND, CMP, BON |                                  |
| Fall 2018                         | OP <sup>AA</sup> <sub>m</sub>     | 12.08**                 | CMP, CHI, STL, IND, BON          |
|                                   | OP <sup>AA</sup> <sub>v</sub>     | 3.81**                  | CMP, STL, IND, BON               |
|                                   | OP <sup>GSH</sup> <sub>m</sub>    | 27.05**                 | CMP, CHI, BON, IND, STL          |
|                                   | OP <sup>GSH</sup> <sub>v</sub>    | 4.07**                  | CMP, CHI, STL, IND               |
|                                   | OP <sup>OH-SLF</sup> <sub>m</sub> | 1.46                    | CMP, IND                         |
|                                   | OP <sup>OH-SLF</sup> <sub>v</sub> | 0.46                    |                                  |
|                                   | OP <sup>DTT</sup> <sub>m</sub>    | 13.39**                 | CMP, CHI, BON, STL, IND          |
|                                   | OP <sup>DTT</sup> <sub>v</sub>    | 0.51                    |                                  |
|                                   | OP <sup>OH-DTT</sup> <sub>m</sub> | 3.52*                   | CHI, STL, IND, BON, CMP          |
| OP <sup>OH-DTT</sup> <sub>v</sub> | 4.00**                            | CHI, STL, IND, BON, CMP |                                  |
| Winter 2018                       | OP <sup>AA</sup> <sub>m</sub>     | 2.21                    | CMP, CHI, STL, IND, BON          |
|                                   | OP <sup>AA</sup> <sub>v</sub>     | 1.95                    | CMP, STL, IND, BON               |
|                                   | OP <sup>GSH</sup> <sub>m</sub>    | 15.75**                 | CMP, CHI, STL, IND, BON          |
|                                   | OP <sup>GSH</sup> <sub>v</sub>    | 12.37**                 | CMP, CHI, STL, IND, BON          |
|                                   | OP <sup>OH-SLF</sup> <sub>m</sub> | 2.23                    | CMP, CHI                         |
|                                   | OP <sup>OH-SLF</sup> <sub>v</sub> | 1.78                    | STL, BON                         |
|                                   | OP <sup>DTT</sup> <sub>m</sub>    | 4.33**                  | CMP, STL, IND                    |
|                                   | OP <sup>DTT</sup> <sub>v</sub>    | 3.23*                   | CHI, STL, IND, BON               |
|                                   | OP <sup>OH-DTT</sup> <sub>m</sub> | 2.60*                   | IND, BON, STL                    |
| OP <sup>OH-DTT</sup> <sub>v</sub> | 2.49*                             | CHI, IND, STL, CMP      |                                  |
| Spring 2019                       | OP <sup>AA</sup> <sub>m</sub>     | 5.20**                  | CMP, CHI, STL, IND, BON          |
|                                   | OP <sup>AA</sup> <sub>v</sub>     | 4.92**                  | CMP, CHI, STL, IND, BON          |
|                                   | OP <sup>GSH</sup> <sub>m</sub>    | 14.59**                 | CMP, CHI, STL, IND, BON          |
|                                   | OP <sup>GSH</sup> <sub>v</sub>    | 10.74**                 | CMP, CHI, STL, IND, BON          |
|                                   | OP <sup>OH-SLF</sup> <sub>m</sub> | 3.20*                   | CMP, CHI, STL, IND, BON          |
|                                   | OP <sup>OH-SLF</sup> <sub>v</sub> | 3.19*                   | CMP, CHI, STL, IND, BON          |
|                                   | OP <sup>DTT</sup> <sub>m</sub>    | 10.78**                 | CMP, CHI, BON, STL               |
|                                   | OP <sup>DTT</sup> <sub>v</sub>    | 6.04**                  | CMP, CHI, STL, IND, BON          |
|                                   | OP <sup>OH-DTT</sup> <sub>m</sub> | 2.57*                   | IND, BON, CMP                    |
| OP <sup>OH-DTT</sup> <sub>v</sub> | 1.89                              | STL, IND, CMP           |                                  |

Asterisks - \* and \*\* indicate significant ( $P < 0.05$ ) and highly significant ( $P < 0.01$ ) differences, respectively.

**Table S5.** Results of 1-way ANOVA test for assessing the temporal and spatial variability of mass-normalized and volume-normalized OP endpoints for methanol-soluble PM<sub>2.5</sub> samples.

(a) Temporal variability

| Sampling Site                     | Endpoint                          | F value                | Significantly different group(s)                 |
|-----------------------------------|-----------------------------------|------------------------|--------------------------------------------------|
| Chicago, IL<br>(CHI)              | OP <sup>AA</sup> <sub>m</sub>     | 1.03                   |                                                  |
|                                   | OP <sup>AA</sup> <sub>v</sub>     | 0.07                   |                                                  |
|                                   | OP <sup>GSH</sup> <sub>m</sub>    | 1.41                   |                                                  |
|                                   | OP <sup>GSH</sup> <sub>v</sub>    | 0.28                   |                                                  |
|                                   | OP <sup>OH-SLF</sup> <sub>m</sub> | 1.68                   | Summer 2018, Spring 2019                         |
|                                   | OP <sup>OH-SLF</sup> <sub>v</sub> | 0.99                   |                                                  |
|                                   | OP <sup>DTT</sup> <sub>m</sub>    | 4.27*                  | Summer 2018, Fall 2018, Winter 2019              |
|                                   | OP <sup>DTT</sup> <sub>v</sub>    | 1.53                   |                                                  |
|                                   | OP <sup>OH-DTT</sup> <sub>m</sub> | 3.84*                  | Summer 2018, Fall 2018, Winter 2018, Spring 2019 |
| OP <sup>OH-DTT</sup> <sub>v</sub> | 3.37*                             | Summer 2018, Fall 2018 |                                                  |
| St. Louis, MO<br>(STL)            | OP <sup>AA</sup> <sub>m</sub>     | 2.16                   | Fall 2018, Spring 2019                           |
|                                   | OP <sup>AA</sup> <sub>v</sub>     | 3.41*                  | Summer 2018, Fall 2018, Spring 2019              |
|                                   | OP <sup>GSH</sup> <sub>m</sub>    | 3.62*                  | Fall 2018, Summer 2018, Winter 2018, Spring 2019 |
|                                   | OP <sup>GSH</sup> <sub>v</sub>    | 1.92                   | Fall 2018, Spring 2019                           |
|                                   | OP <sup>OH-SLF</sup> <sub>m</sub> | 1.05                   |                                                  |
|                                   | OP <sup>OH-SLF</sup> <sub>v</sub> | 1.23                   |                                                  |
|                                   | OP <sup>DTT</sup> <sub>m</sub>    | 1.14                   |                                                  |
|                                   | OP <sup>DTT</sup> <sub>v</sub>    | 1.87                   | Summer 2018, Winter 2019                         |
|                                   | OP <sup>OH-DTT</sup> <sub>m</sub> | 0.50                   |                                                  |
| OP <sup>OH-DTT</sup> <sub>v</sub> | 1.11                              |                        |                                                  |
| Indianapolis,<br>IN (IND)         | OP <sup>AA</sup> <sub>m</sub>     | 2.42                   | Summer 2018, Spring 2019                         |
|                                   | OP <sup>AA</sup> <sub>v</sub>     | 1.39                   |                                                  |
|                                   | OP <sup>GSH</sup> <sub>m</sub>    | 2.15*                  | Fall 2018, Spring 2019                           |
|                                   | OP <sup>GSH</sup> <sub>v</sub>    | 0.63                   |                                                  |
|                                   | OP <sup>OH-SLF</sup> <sub>m</sub> | 3.49*                  | Fall 2018, Spring 2019, Winter 2018              |
|                                   | OP <sup>OH-SLF</sup> <sub>v</sub> | 2.41                   | Fall 2018, Winter 2018                           |
|                                   | OP <sup>DTT</sup> <sub>m</sub>    | 1.42                   |                                                  |
|                                   | OP <sup>DTT</sup> <sub>v</sub>    | 0.94                   |                                                  |
|                                   | OP <sup>OH-DTT</sup> <sub>m</sub> | 0.20                   |                                                  |
| OP <sup>OH-DTT</sup> <sub>v</sub> | 0.67                              |                        |                                                  |
| Champaign, IL<br>(CMP)            | OP <sup>AA</sup> <sub>m</sub>     | 1.64                   | Summer 2018, Winter 2018                         |
|                                   | OP <sup>AA</sup> <sub>v</sub>     | 2.95*                  | Summer 2018, Fall 2018, Winter 2018              |
|                                   | OP <sup>GSH</sup> <sub>m</sub>    | 1.42                   |                                                  |
|                                   | OP <sup>GSH</sup> <sub>v</sub>    | 0.03                   |                                                  |
|                                   | OP <sup>OH-SLF</sup> <sub>m</sub> | 1.00                   |                                                  |
|                                   | OP <sup>OH-SLF</sup> <sub>v</sub> | 1.22                   |                                                  |
|                                   | OP <sup>DTT</sup> <sub>m</sub>    | 3.73*                  | Summer 2018, Winter 2018                         |
|                                   | OP <sup>DTT</sup> <sub>v</sub>    | 2.93*                  | Summer 2018, Fall 2018, Winter 2018              |
|                                   | OP <sup>OH-DTT</sup> <sub>m</sub> | 0.08                   |                                                  |
| OP <sup>OH-DTT</sup> <sub>v</sub> | 0.59                              |                        |                                                  |
| Bondville, IL<br>(BON)            | OP <sup>AA</sup> <sub>m</sub>     | 8.76**                 | Summer 2018, Fall 2018, Spring 2019, Winter 2018 |
|                                   | OP <sup>AA</sup> <sub>v</sub>     | 9.27**                 | Summer 2018, Fall 2018, Spring 2019, Winter 2018 |
|                                   | OP <sup>GSH</sup> <sub>m</sub>    | 1.51                   |                                                  |
|                                   | OP <sup>GSH</sup> <sub>v</sub>    | 1.58                   | Summer 2018, Winter 2018                         |
|                                   | OP <sup>OH-SLF</sup> <sub>m</sub> | 4.30**                 | Summer 2018, Spring 2019, Winter 2018            |
|                                   | OP <sup>OH-SLF</sup> <sub>v</sub> | 4.70**                 | Summer 2018, Spring 2019, Winter 2018            |
|                                   | OP <sup>DTT</sup> <sub>m</sub>    | 2.95*                  | Summer 2018, Spring 2019, Winter 2018            |
|                                   | OP <sup>DTT</sup> <sub>v</sub>    | 4.28**                 | Summer 2018, Fall 2018, Spring 2019, Winter 2018 |
|                                   | OP <sup>OH-DTT</sup> <sub>m</sub> | 2.24                   |                                                  |
|                                   | OP <sup>OH-DTT</sup> <sub>v</sub> | 1.64                   |                                                  |

## (b) Spatial variability

| Season      | Endpoint                          | F value | Significantly different group(s) |
|-------------|-----------------------------------|---------|----------------------------------|
| Summer 2018 | OP <sup>AA</sup> <sub>m</sub>     | 1.17    | BON, STL                         |
|             | OP <sup>AA</sup> <sub>v</sub>     | 0.13    |                                  |
|             | OP <sup>GSH</sup> <sub>m</sub>    | 2.00    | CMP, STL, IND                    |
|             | OP <sup>GSH</sup> <sub>v</sub>    | 0.40    |                                  |
|             | OP <sup>OH-SLF</sup> <sub>m</sub> | 2.80*   | CHI, CMP, IND, STL               |
|             | OP <sup>OH-SLF</sup> <sub>v</sub> | 1.67    | CHI, CMP, IND                    |
|             | OP <sup>DTT</sup> <sub>m</sub>    | 0.74    |                                  |
|             | OP <sup>DTT</sup> <sub>v</sub>    | 0.46    |                                  |
|             | OP <sup>OH-DTT</sup> <sub>m</sub> | 3.75**  | CHI, STL, CMP                    |
|             | OP <sup>OH-DTT</sup> <sub>v</sub> | 3.11*   | CHI, IND, STL, CMP               |
| Fall 2018   | OP <sup>AA</sup> <sub>m</sub>     | 0.62    |                                  |
|             | OP <sup>AA</sup> <sub>v</sub>     | 2.40    | STL, CMP, BON                    |
|             | OP <sup>GSH</sup> <sub>m</sub>    | 2.55*   | CMP, STL, BON, IND               |
|             | OP <sup>GSH</sup> <sub>v</sub>    | 1.05    |                                  |
|             | OP <sup>OH-SLF</sup> <sub>m</sub> | 0.81    |                                  |
|             | OP <sup>OH-SLF</sup> <sub>v</sub> | 0.97    |                                  |
|             | OP <sup>DTT</sup> <sub>m</sub>    | 0.33    |                                  |
|             | OP <sup>DTT</sup> <sub>v</sub>    | 2.50*   | STL, CMP, BON                    |
|             | OP <sup>OH-DTT</sup> <sub>m</sub> | 1.99    | IND, STL, CMP                    |
|             | OP <sup>OH-DTT</sup> <sub>v</sub> | 2.28    | IND, CMP, BON                    |
| Winter 2018 | OP <sup>AA</sup> <sub>m</sub>     | 1.06    |                                  |
|             | OP <sup>AA</sup> <sub>v</sub>     | 3.62**  | CHI, STL, IND, BON               |
|             | OP <sup>GSH</sup> <sub>m</sub>    | 6.31**  | CMP, CHI, BON, STL, IND          |
|             | OP <sup>GSH</sup> <sub>v</sub>    | 2.86*   | CHI, CMP, IND, BON               |
|             | OP <sup>OH-SLF</sup> <sub>m</sub> | 1.79    | CHI, BON, STL                    |
|             | OP <sup>OH-SLF</sup> <sub>v</sub> | 3.21*   | CHI, IND, CMP, STL, BON          |
|             | OP <sup>DTT</sup> <sub>m</sub>    | 0.86    |                                  |
|             | OP <sup>DTT</sup> <sub>v</sub>    | 2.45*   | CHI, STL, CMP, BON               |
|             | OP <sup>OH-DTT</sup> <sub>m</sub> | 2.21    | IND, CMP, BON, STL               |
|             | OP <sup>OH-DTT</sup> <sub>v</sub> | 2.67*   | CHI, IND, CMP, BON               |
| Spring 2019 | OP <sup>AA</sup> <sub>m</sub>     | 1.60    |                                  |
|             | OP <sup>AA</sup> <sub>v</sub>     | 2.46*   | CHI, CMP, BON                    |
|             | OP <sup>GSH</sup> <sub>m</sub>    | 7.44**  | CMP, CHI, IND, STL               |
|             | OP <sup>GSH</sup> <sub>v</sub>    | 4.33**  | CMP, CHI, BON, IND, STL          |
|             | OP <sup>OH-SLF</sup> <sub>m</sub> | 0.46    |                                  |
|             | OP <sup>OH-SLF</sup> <sub>v</sub> | 0.60    |                                  |
|             | OP <sup>DTT</sup> <sub>m</sub>    | 0.79    |                                  |
|             | OP <sup>DTT</sup> <sub>v</sub>    | 1.93    | CHI, BON                         |
|             | OP <sup>OH-DTT</sup> <sub>m</sub> | 2.15    | BON, IND, CMP                    |
|             | OP <sup>OH-DTT</sup> <sub>v</sub> | 1.63    | IND, CMP                         |

Asterisks - \* and \*\* indicate significant ( $P < 0.05$ ) and highly significant ( $P < 0.01$ ) differences, respectively.



**Table S6.** Comparison of ambient PM<sub>2.5</sub> OP measured in our current study with those reported in the literatures. Asterisk - \* indicates that the reported results are methanol-soluble OP, while all the other results (without the asterisk) are water-soluble OP.

(a) OP<sup>AA</sup>

| Reference             | PM size (μm) | Levels                                                   | Location               | Location type   | Sample size | Methodology                                                                                                                                                                                                                                                                                                                                                                      |
|-----------------------|--------------|----------------------------------------------------------|------------------------|-----------------|-------------|----------------------------------------------------------------------------------------------------------------------------------------------------------------------------------------------------------------------------------------------------------------------------------------------------------------------------------------------------------------------------------|
| Fang et al. (2016)    | ≤ 2.5        | 0.2 - 5.2 nmol·min <sup>-1</sup> ·m <sup>-3</sup>        | Southeast US           | Urban and rural | 483         | Ambient PM <sub>2.5</sub> samples were collected using a Hi-Vol sampler on quartz filters, extracted in DI and filtered through a syringe filter. OP <sup>AA</sup> of filtered extracts was assessed with an AA-only assay (no other antioxidants involved; concentration of AA was 200 μM) with an automated system. AA was measured based on a photometric method (at 265 nm). |
| Mudway et al. (2005)  | ≤ 2.5        | 0.012 ± 0.0001 nmol·min <sup>-1</sup> ·μg <sup>-1</sup>  | Eksaal, India          | Biomass burning | 3           | Biomass burning samples were collected from dung-cake combustion, and extracted in Chelex-treated DI with 5% methanol. OP <sup>AA</sup> of filtered extracts was assessed in a respiratory tract lining fluid (RTLF; composition was 200 μM AA, 200 μM GSH and 200 μM UA). AA was measured based on a photometric method (at 265 nm).                                            |
| Künzli et al. (2006)  | ≤ 2.5        | 0.0096 ± 0.0025 nmol·min <sup>-1</sup> ·μg <sup>-1</sup> | 19 European cities     | Urban           | 716         | Ambient PM <sub>2.5</sub> samples were collected using a Basel-Sampler, and extracted in metal-free DI. OP <sup>AA</sup> was assessed in the same manner as Mudway et al. (2005).                                                                                                                                                                                                |
| Szigeti et al. (2016) | ≤ 2.5        | 0.0017 – 0.04 nmol·min <sup>-1</sup> ·μg <sup>-1</sup>   | 8 European cities      | Urban           | 22          | Ambient and indoor PM <sub>2.5</sub> samples were collected using a Low-Vol sampler, and directly incubated in RTLF having same composition as in Mudway et al. (2005). AA was measured based on a photometric method (at 265 nm).                                                                                                                                               |
| Godri et al. (2011)   | 1.0 – 1.9    | 0.0058 ± 0.0025 nmol·min <sup>-1</sup> ·μg <sup>-1</sup> | London, United Kingdom | Urban           | 14          | Ambient size-segregated samples were collected using a MOUDI sampler, and extracted in Chelex-treated DI with 5% methanol. OP <sup>AA</sup> was assessed in the same manner as Mudway et al. (2005).                                                                                                                                                                             |

|                       |            |                                                                                                                                                                                                                                                                                                            |                                     |                      |     |                                                                                                                                                                                                                                                                                                                                   |
|-----------------------|------------|------------------------------------------------------------------------------------------------------------------------------------------------------------------------------------------------------------------------------------------------------------------------------------------------------------|-------------------------------------|----------------------|-----|-----------------------------------------------------------------------------------------------------------------------------------------------------------------------------------------------------------------------------------------------------------------------------------------------------------------------------------|
| Perrone et al. (2019) | $\leq 2.5$ | $0.006 \pm 0.001 \text{ nmol} \cdot \text{min}^{-1} \cdot \mu\text{g}^{-1}$<br>$0.136 \pm 0.020 \text{ nmol} \cdot \text{min}^{-1} \cdot \text{m}^{-3}$                                                                                                                                                    | Lecce, Italy                        | Urban                | 39  | Ambient $\text{PM}_{2.5}$ samples were collected using a low volume HYDRA-FAI dual sampler, and extracted in DI. $\text{OP}^{\text{AA}}$ of filtered extracts was assessed with an AA-only assay similar as in Fang et al. (2016).                                                                                                |
| Gao et al. (2020a)    | $\leq 2.5$ | $0.023 - 0.126 \text{ nmol} \cdot \text{min}^{-1} \cdot \text{m}^{-3}$                                                                                                                                                                                                                                     | Atlanta, GA                         | Urban                | 349 | Ambient $\text{PM}_{2.5}$ samples were collected using a Hi-Vol sampler on quartz filters, extracted in DI and filtered through a syringe filter. $\text{OP}^{\text{AA}}$ was assessed in the same manner as Mudway et al. (2005).                                                                                                |
| Yang et al. (2014)    | $\leq 2.5$ | $0.8 - 35.0 \text{ nmol} \cdot \text{s}^{-1} \cdot \text{m}^{-3}$                                                                                                                                                                                                                                          | Rotterdam and Amsterdam, Netherland | Urban                | 10  | Ambient $\text{PM}_{2.5}$ samples were collected using a Harvard Impactor and extracted in ultrapure water. $\text{OP}^{\text{AA}}$ of filtered extracts was assessed AA-only assay similar as in Fang et al. (2016).                                                                                                             |
| Yu et al. (2020)      | $\leq 2.5$ | $0.004 - 0.077 \text{ nmol} \cdot \text{min}^{-1} \cdot \mu\text{g}^{-1}$<br>median: $0.012 \text{ nmol} \cdot \text{min}^{-1} \cdot \mu\text{g}^{-1}$<br>$0.044 - 0.745 \text{ nmol} \cdot \text{min}^{-1} \cdot \text{m}^{-3}$<br>median: $0.160 \text{ nmol} \cdot \text{min}^{-1} \cdot \text{m}^{-3}$ | Midwest US (5 sites)                | Urban (4), rural (1) | 54  | $\text{PM}_{2.5}$ sampling, preparation and $\text{OP}^{\text{AA}}$ measurement were conducted in the same manner as the current study.                                                                                                                                                                                           |
| Yang et al. (2014)*   | $\leq 2.5$ | $2.2 - 43.5 \text{ nmol} \cdot \text{s}^{-1} \cdot \text{m}^{-3}$                                                                                                                                                                                                                                          | Rotterdam and Amsterdam, Netherland | Urban                | 20  | Ambient $\text{PM}_{2.5}$ samples were collected using a Harvard Impactor and extracted in methanol. Filtered methanol extracts were evaporated using an evaporator set, and reconstituted with DI. $\text{OP}^{\text{AA}}$ of water-reconstituted methanol extracts was assessed AA-only assay similar as in Fang et al. (2016). |
| This study            | $\leq 2.5$ | $0.002 - 0.077 \text{ nmol} \cdot \text{min}^{-1} \cdot \mu\text{g}^{-1}$<br>median: $0.007 \text{ nmol} \cdot \text{min}^{-1} \cdot \mu\text{g}^{-1}$<br>$0.012 - 0.908 \text{ nmol} \cdot \text{min}^{-1} \cdot \text{m}^{-3}$<br>median: $0.078 \text{ nmol} \cdot \text{min}^{-1} \cdot \text{m}^{-3}$ | Midwest US (5 sites)                | Urban (4), rural (1) | 241 | See section 2 (experimental methods).                                                                                                                                                                                                                                                                                             |
| This study*           |            | $0.004 - 0.029 \text{ nmol} \cdot \text{min}^{-1} \cdot \mu\text{g}^{-1}$<br>median: $0.012 \text{ nmol} \cdot \text{min}^{-1} \cdot \mu\text{g}^{-1}$<br>$0.030 - 0.311 \text{ nmol} \cdot \text{min}^{-1} \cdot \text{m}^{-3}$<br>median: $0.134 \text{ nmol} \cdot \text{min}^{-1} \cdot \text{m}^{-3}$ | Midwest US (5 sites)                | Urban (4), rural (1) | 241 |                                                                                                                                                                                                                                                                                                                                   |

Asterisk - \* indicates that the reported results are methanol-soluble  $\text{OP}^{\text{AA}}$ .

(b) OP<sup>GSH</sup>

| Reference             | PM size<br>( $\mu\text{m}$ ) | Levels                                                                                                                                                                                                                                                                                     | Location                  | Location<br>type           | Sample<br>size | Methodology                                                                                                                                                                                                                         |
|-----------------------|------------------------------|--------------------------------------------------------------------------------------------------------------------------------------------------------------------------------------------------------------------------------------------------------------------------------------------|---------------------------|----------------------------|----------------|-------------------------------------------------------------------------------------------------------------------------------------------------------------------------------------------------------------------------------------|
| Mudway et al. (2005)  | $\leq 2.5$                   | $0.0083 \pm 0.0002 \text{ nmol}\cdot\text{min}^{-1}\cdot\mu\text{g}^{-1}$                                                                                                                                                                                                                  | Eksaal, India             | Biomass<br>burning         | 3              | OP <sup>GSH</sup> of filtered extracts was measured in RTLF. GSH was measured with a glutathione disulfide (GSSG)-reductase-5,5-dithio-bis-(2-nitrobenzoic acid) (DTNB) recycling assay, based on a photometric method (at 405 nm). |
| Künzli et al. (2006)  | $\leq 2.5$                   | $0.0041 \pm 0.0017 \text{ nmol}\cdot\text{min}^{-1}\cdot\mu\text{g}^{-1}$                                                                                                                                                                                                                  | 19 European<br>cities     | Urban                      | 716            | OP <sup>GSH</sup> was assessed in the same manner as Mudway et al. (2005).                                                                                                                                                          |
| Szigeti et al. (2016) | $\leq 2.5$                   | $0 - 0.0275 \text{ nmol}\cdot\text{min}^{-1}\cdot\mu\text{g}^{-1}$                                                                                                                                                                                                                         | 8 European cities         | Urban                      | 22             | Punches of filter samples were directly incubated in RTLF, and measured for OP <sup>GSH</sup> in the same manner with Mudway et al. (2005).                                                                                         |
| Godri et al. (2011)   | 1.0 – 1.9                    | $0.0042 \pm 0.0033 \text{ nmol}\cdot\text{min}^{-1}\cdot\mu\text{g}^{-1}$                                                                                                                                                                                                                  | London, United<br>Kingdom | Urban                      | 14             | OP <sup>GSH</sup> was assessed in the same manner as Mudway et al. (2005).                                                                                                                                                          |
| Gao et al. (2020a)    | $\leq 2.5$                   | $0.025 - 0.067 \text{ nmol}\cdot\text{min}^{-1}\cdot\text{m}^{-3}$                                                                                                                                                                                                                         | Atlanta, GA               | Urban                      | 349            | OP <sup>GSH</sup> was assessed in the same manner as Mudway et al. (2005).                                                                                                                                                          |
| Yu et al. (2020)      | $\leq 2.5$                   | $0.001 - 0.040 \text{ nmol}\cdot\text{min}^{-1}\cdot\mu\text{g}^{-1}$<br>median: $0.010 \text{ nmol}\cdot\text{min}^{-1}\cdot\mu\text{g}^{-1}$<br>$0.008 - 0.463 \text{ nmol}\cdot\text{min}^{-1}\cdot\text{m}^{-3}$<br>median: $0.100 \text{ nmol}\cdot\text{min}^{-1}\cdot\text{m}^{-3}$ | Midwest US (5<br>sites)   | Urban<br>(4), rural<br>(1) | 54             | PM <sub>2.5</sub> sampling, preparation and OP <sup>GSH</sup> measurement were conducted in the same manner as the current study.                                                                                                   |
| This study            | $\leq 2.5$                   | $0.002 - 0.035 \text{ nmol}\cdot\text{min}^{-1}\cdot\mu\text{g}^{-1}$<br>median: $0.007 \text{ nmol}\cdot\text{min}^{-1}\cdot\mu\text{g}^{-1}$<br>$0.013 - 0.419 \text{ nmol}\cdot\text{min}^{-1}\cdot\text{m}^{-3}$<br>median: $0.074 \text{ nmol}\cdot\text{min}^{-1}\cdot\text{m}^{-3}$ | Midwest US (5<br>sites)   | Urban<br>(4), rural<br>(1) | 241            | See section 2 (experimental methods).                                                                                                                                                                                               |

(c)  $OP^{OH-SLF}$ 

| Reference            | PM size<br>( $\mu\text{m}$ ) | Levels                                                                                                                                                                                                                                                                                                 | Location             | Location<br>type     | Sample<br>size | Methodology                                                                                                                                                                                                                                                                                                                                                                                                                                                                                                                             |
|----------------------|------------------------------|--------------------------------------------------------------------------------------------------------------------------------------------------------------------------------------------------------------------------------------------------------------------------------------------------------|----------------------|----------------------|----------------|-----------------------------------------------------------------------------------------------------------------------------------------------------------------------------------------------------------------------------------------------------------------------------------------------------------------------------------------------------------------------------------------------------------------------------------------------------------------------------------------------------------------------------------------|
| Vidrio et al. (2009) | $\leq 2.5$                   | $0.253 \pm 0.135 \text{ pmol} \cdot \text{min}^{-1} \cdot \mu\text{g}^{-1}$                                                                                                                                                                                                                            | Davis, CA            | Urban                | ~90            | Ambient $PM_{2.5}$ samples were collected using IMPROVE Version II samplers on Teflo filters, directly incubated in SLF (composition was 114 mM NaCl, 10 mM sodium benzoate, 10 mM total phosphate to buffer the solution at pH 7.4, 200 $\mu\text{M}$ AA and 300 $\mu\text{M}$ CA) with desferoxamine (DSF) for 24 hours, and measured for $\cdot\text{OH}$ generation. $\cdot\text{OH}$ was captured by sodium benzoate and measured based on a photometric method (at 256 nm) using a high-performance liquid chromatography (HPLC). |
| Ma et al. (2015)     | $\leq 2.5$                   | $0.092 \pm 0.019 \text{ pmol} \cdot \text{min}^{-1} \cdot \mu\text{g}^{-1}$                                                                                                                                                                                                                            | Guangzhou, China     | Urban                | 72             | Ambient $PM_{2.5}$ samples were collected using a Low-Vol sampler on Teflon filters. $OP^{OH-SLF}$ was measured in the same manner as in Vidrio et al. (2009).                                                                                                                                                                                                                                                                                                                                                                          |
| Yu et al. (2020)     | $\leq 2.5$                   | 0.085 – 0.967 $\text{pmol} \cdot \text{min}^{-1} \cdot \mu\text{g}^{-1}$<br>median: 0.307 $\text{pmol} \cdot \text{min}^{-1} \cdot \mu\text{g}^{-1}$<br>0.857 – 7.884 $\text{pmol} \cdot \text{min}^{-1} \cdot \text{m}^{-3}$<br>median: 3.559 $\text{pmol} \cdot \text{min}^{-1} \cdot \text{m}^{-3}$ | Midwest US (5 sites) | Urban (4), rural (1) | 54             | $PM_{2.5}$ sampling, preparation and $OP^{OH-SLF}$ measurement were conducted in the same manner as the current study.                                                                                                                                                                                                                                                                                                                                                                                                                  |
| This study           | $\leq 2.5$                   | 0.040 – 1.217 $\text{pmol} \cdot \text{min}^{-1} \cdot \mu\text{g}^{-1}$<br>median: 0.142 $\text{pmol} \cdot \text{min}^{-1} \cdot \mu\text{g}^{-1}$<br>0.269 – 12.13 $\text{pmol} \cdot \text{min}^{-1} \cdot \text{m}^{-3}$<br>median: 1.449 $\text{pmol} \cdot \text{min}^{-1} \cdot \text{m}^{-3}$ | Midwest US (5 sites) | Urban (4), rural (1) | 241            | See section 2 (experimental methods).                                                                                                                                                                                                                                                                                                                                                                                                                                                                                                   |

(d) OP<sup>DTT</sup>

| Reference                     | PM size<br>( $\mu\text{m}$ ) | Levels                                                                                                                                                                                                                                                                                             | Location              | Location<br>type   | Sample<br>size | Methodology                                                                                                                                                                                                                                                                                                                                                                                      |
|-------------------------------|------------------------------|----------------------------------------------------------------------------------------------------------------------------------------------------------------------------------------------------------------------------------------------------------------------------------------------------|-----------------------|--------------------|----------------|--------------------------------------------------------------------------------------------------------------------------------------------------------------------------------------------------------------------------------------------------------------------------------------------------------------------------------------------------------------------------------------------------|
| Fang et al. (2015)            | $\leq 2.5$                   | 0.010 – 0.097 $\text{nmol}\cdot\text{min}^{-1}\cdot\mu\text{g}^{-1}$<br>median: 0.024 – 0.041 $\text{nmol}\cdot\text{min}^{-1}\cdot\mu\text{g}^{-1}$<br>0.05 – 0.81 $\text{nmol}\cdot\text{min}^{-1}\cdot\text{m}^{-3}$<br>median: 0.23 – 0.31 $\text{nmol}\cdot\text{min}^{-1}\cdot\text{m}^{-3}$ | Southeast US          | Urban<br>and rural | 503            | Ambient PM <sub>2.5</sub> samples were collected using a Hi-Vol sampler on quartz filters, extracted in DI and filtered through a syringe filter. Filtered extracts were then incubated in a mixture of 100 $\mu\text{M}$ DTT and 0.5 mM potassium phosphate buffer (K-PB; pH = 7.4). DTT was captured by DTNB and measured based on a photometric method (at 412 nm) using an automated system. |
| Xiong et al. (2017)           | $\leq 2.5$                   | 0.1 – 0.18 $\text{nmol}\cdot\text{min}^{-1}\cdot\text{m}^{-3}$                                                                                                                                                                                                                                     | Urbana, IL            | Urban              | 10             | Ambient PM <sub>2.5</sub> samples were collected with Hi-Vol sampler on quartz filters, extracted in Milli-Q water, and filtered through a syringe filter. OP <sup>DTT</sup> were assessed in the same manner with Fang et al. (2015).                                                                                                                                                           |
| Cho et al. (2005)             | $\leq 2.5$                   | 0.013 – 0.047 $\text{nmol}\cdot\text{min}^{-1}\cdot\mu\text{g}^{-1}$<br>median: 0.029 $\text{nmol}\cdot\text{min}^{-1}\cdot\mu\text{g}^{-1}$                                                                                                                                                       | Los Angeles basin, CA | Urban              | 11             | Ambient size-segregated samples were collected using a VACES in conjunction with a BioSampler. Collected suspensions were then incubated in a mixture of 100 $\mu\text{M}$ DTT and 0.5 mM potassium phosphate buffer (K-PB; pH = 7.4). DTT was captured by DTNB and measured based on a photometric method (at 412 nm) at designated time points within 90 min.                                  |
| Charrier and Anastasio (2012) | $\leq 2.5$                   | 0.02 – 0.061 $\text{nmol}\cdot\text{min}^{-1}\cdot\mu\text{g}^{-1}$<br>median: 0.029 $\text{nmol}\cdot\text{min}^{-1}\cdot\mu\text{g}^{-1}$                                                                                                                                                        | San Joaquin, CA       | Urban,<br>rural    | 6              | Ambient PM <sub>2.5</sub> samples were collected on Teflon filters, but the filter extraction method was not reported. DTT assay was conducted by incubating the aqueous sample extracts in 100 $\mu\text{M}$ DTT. DTT was captured by DTNB and measured based on a photometric method (at 412 nm) at four time points within 16 min.                                                            |
| Gao et al. (2017)             | $\leq 2.5$                   | 0.09 – 0.30 $\text{nmol}\cdot\text{min}^{-1}\cdot\text{m}^{-3}$<br>median: 0.19 $\text{nmol}\cdot\text{min}^{-1}\cdot\text{m}^{-3}$                                                                                                                                                                | Atlanta, GA (2 sites) | Urban              | 66             | PM <sub>2.5</sub> sampling, preparation and OP <sup>DTT</sup> measurement were conducted in the same manner as                                                                                                                                                                                                                                                                                   |

|                                           |            |                                                                                                                                                                                                                                   |                        |       |     |                                                                                                                                                                                                                                                                                                                                                                                                                      |
|-------------------------------------------|------------|-----------------------------------------------------------------------------------------------------------------------------------------------------------------------------------------------------------------------------------|------------------------|-------|-----|----------------------------------------------------------------------------------------------------------------------------------------------------------------------------------------------------------------------------------------------------------------------------------------------------------------------------------------------------------------------------------------------------------------------|
| Gao et al. (2020a) and Gao et al. (2020b) | $\leq 2.5$ | 0.005 – 0.070 nmol·min <sup>-1</sup> ·μg <sup>-1</sup><br>average: 0.024 nmol·min <sup>-1</sup> ·μg <sup>-1</sup><br>0.05 – 0.48 nmol·min <sup>-1</sup> ·m <sup>-3</sup><br>average: 0.22 nmol·min <sup>-1</sup> ·m <sup>-3</sup> | Atlanta, GA            | Urban | 349 | Fang et al. (2015). PM <sub>2.5</sub> sampling, preparation and OP <sup>DTT</sup> measurement were conducted in the same manner as Fang et al. (2015).                                                                                                                                                                                                                                                               |
| Hu et al. (2008)                          | 0.25 – 2.5 | 0.014 – 0.024 nmol·min <sup>-1</sup> ·μg <sup>-1</sup><br>median: 0.019 nmol·min <sup>-1</sup> ·μg <sup>-1</sup><br>0.10 – 0.16 nmol·min <sup>-1</sup> ·m <sup>-3</sup><br>median: 0.14 nmol·min <sup>-1</sup> ·m <sup>-3</sup>   | Los Angeles harbor, CA | Urban | 6   | Ambient size-segregated samples were collected with Sioutas samplers on Zefluor and Quartz filters, and extracted in Milli-Q water. DTT assay was conducted by incubating the PM suspensions in 100 μM DTT at pH = 7.4 adjusted by K-PB. DTT was captured by DTNB and measured based on a photometric method (at 412 nm) at designated time points within 30 min.                                                    |
| Cesari et al. (2019)                      | $\leq 2.5$ | 0.012 ± 0.008 nmol·min <sup>-1</sup> ·μg <sup>-1</sup><br>0.19 ± 0.10 nmol·min <sup>-1</sup> ·m <sup>-3</sup>                                                                                                                     | Sarno, Italy           | Urban | ~50 | Ambient PM <sub>2.5</sub> samples were collected using a Low-Vol sequential sampler on quartz filters, extracted in DI and filtered through a syringe filter. DTT assay was conducted by incubating the extracts in DTT (concentration not reported) at pH = 7.4 adjusted by K-PB. DTT was captured by DTNB and measured based on a photometric method (at 412 nm) at designated time points (details not reported). |
| Paraskevopoulou et al. (2019)             | $\leq 2.5$ | 0.028 ± 0.014 nmol·min <sup>-1</sup> ·μg <sup>-1</sup><br>0.33 ± 0.20 nmol·min <sup>-1</sup> ·m <sup>-3</sup>                                                                                                                     | Athens, Greece         | Urban | 361 | Ambient PM <sub>2.5</sub> samples were collected using a Dichotomous Partisol sampler on quartz filters, extracted in DI and filtered through a syringe filter. OP <sup>DTT</sup> was assessed in the same manner as Fang et al. (2015).                                                                                                                                                                             |
| Perrone et al. (2019)                     | $\leq 2.5$ | 0.010 ± 0.001 nmol·min <sup>-1</sup> ·μg <sup>-1</sup><br>0.228 ± 0.024 nmol·min <sup>-1</sup> ·m <sup>-3</sup>                                                                                                                   | Lecce, Italy           | Urban | 39  | Ambient PM <sub>2.5</sub> samples were collected using a low volume HYDRA-FAI dual sampler, and extracted in DI. DTT assay was conducted by incubating the aqueous sample extracts in 100 μM DTT. DTT was captured by DTNB and measured based on a photometric method (at 412 nm) at five time points within 40 min.                                                                                                 |

|                      |            |                                                                                                                                                                                                                                                                                            |                                     |                      |    |                                                                                                                                                                                                                                                                                                                                                                                                                                                                                                                                                                                                                                                                                                                                                                                                           |
|----------------------|------------|--------------------------------------------------------------------------------------------------------------------------------------------------------------------------------------------------------------------------------------------------------------------------------------------|-------------------------------------|----------------------|----|-----------------------------------------------------------------------------------------------------------------------------------------------------------------------------------------------------------------------------------------------------------------------------------------------------------------------------------------------------------------------------------------------------------------------------------------------------------------------------------------------------------------------------------------------------------------------------------------------------------------------------------------------------------------------------------------------------------------------------------------------------------------------------------------------------------|
| Yang et al. (2014)   | $\leq 2.5$ | $0.4 - 7.2 \text{ nmol}\cdot\text{s}^{-1}\cdot\text{m}^{-3}$                                                                                                                                                                                                                               | Rotterdam and Amsterdam, Netherland | Urban                | 10 | Ambient $\text{PM}_{2.5}$ samples were collected using a Harvard Impactor and extracted in ultrapure water. $\text{OP}^{\text{DTT}}$ of water-soluble extracts was assessed in the same manner as Hu et al. (2008).                                                                                                                                                                                                                                                                                                                                                                                                                                                                                                                                                                                       |
| Yu et al. (2020)     | $\leq 2.5$ | $0.004 - 0.193 \text{ nmol}\cdot\text{min}^{-1}\cdot\mu\text{g}^{-1}$<br>median: $0.014 \text{ nmol}\cdot\text{min}^{-1}\cdot\mu\text{g}^{-1}$<br>$0.041 - 1.282 \text{ nmol}\cdot\text{min}^{-1}\cdot\text{m}^{-3}$<br>median: $0.146 \text{ nmol}\cdot\text{min}^{-1}\cdot\text{m}^{-3}$ | Midwest US (5 sites)                | Urban (4), rural (1) | 54 | $\text{PM}_{2.5}$ sampling, preparation and $\text{OP}^{\text{DTT}}$ measurement were conducted in the same manner as the current study.                                                                                                                                                                                                                                                                                                                                                                                                                                                                                                                                                                                                                                                                  |
| Verma et al. (2012)* | $\leq 2.5$ | $0.020 - 0.054 \text{ nmol}\cdot\text{min}^{-1}\cdot\mu\text{g}^{-1}$<br>median: $0.034 \text{ nmol}\cdot\text{min}^{-1}\cdot\mu\text{g}^{-1}$                                                                                                                                             | Atlanta, GA                         | Urban                | 8  | Ambient $\text{PM}_{2.5}$ samples were collected using a Hi-Vol sampler on quartz filters, extracted in both methanol and water, and filtered through a syringe filter. Methanol extracts were evaporated to nearly dryness using a rotary evaporator and reconstituted to 15 mL with 0.1 M K-PB (pH = 7.4). Reconstituted methanol extracts were incubated in 100 $\mu\text{M}$ DTT and 0.5 M K-PB (pH = 7.4). DTT was captured by DTNB and measured based on a photometric method (at 412 nm) at seven time points within 20 min.                                                                                                                                                                                                                                                                       |
| Gao et al. (2017)*   | $\leq 2.5$ | $0.14 - 0.47 \text{ nmol}\cdot\text{min}^{-1}\cdot\text{m}^{-3}$<br>median: $0.30 \text{ nmol}\cdot\text{min}^{-1}\cdot\text{m}^{-3}$                                                                                                                                                      | Atlanta, GA (2 sites)               | Urban                | 66 | Method 1: Ambient $\text{PM}_{2.5}$ samples were extracted in a stepwise manner with DI and methanol. Both extracts were filtered through a syringe filter. Methanol extracts were evaporated to $\sim 200 \mu\text{L}$ using high-purity nitrogen and reconstituted with DI. Total OP was calculated by adding the OP of both extracts. Method 2: Samples were extracted in methanol. Punches were removed after sonication. The remaining suspensions were analyzed for $\text{OP}^{\text{DTT}}$ without being filtered through a syringe filter. Method 3: Samples were sonicated in K-PB (pH = 7.4). The mixture was analyzed for $\text{OP}^{\text{DTT}}$ without removing inside punches or being filtered through a syringe filter. $\text{OP}^{\text{DTT}}$ measurement was conducted in the same |

|                     |            |                                                                                                                                                                                                                                    |                                           |                            |     |                                                                                                                                                                                                                                                                                                                                                                                                                                                                                                                                                                                                                                                    |
|---------------------|------------|------------------------------------------------------------------------------------------------------------------------------------------------------------------------------------------------------------------------------------|-------------------------------------------|----------------------------|-----|----------------------------------------------------------------------------------------------------------------------------------------------------------------------------------------------------------------------------------------------------------------------------------------------------------------------------------------------------------------------------------------------------------------------------------------------------------------------------------------------------------------------------------------------------------------------------------------------------------------------------------------------------|
| Gao et al. (2020b)* | $\leq 2.5$ | 0.012 – 0.116 nmol·min <sup>-1</sup> ·μg <sup>-1</sup><br>average: 0.027 nmol·min <sup>-1</sup> ·μg <sup>-1</sup><br>0.13 – 0.58 nmol·min <sup>-1</sup> ·m <sup>-3</sup><br>average: 0.28 nmol·min <sup>-1</sup> ·m <sup>-3</sup>  | Atlanta, GA                               | Urban                      | 349 | <p>manner as Fang et al. (2015) using a modified automated system for analyzing suspensions with insoluble fractions.</p> <p>PM<sub>2.5</sub> sampling, preparation and OP<sup>DTT</sup> measurement were conducted in the same manner as Gao et al. (2017) (Method 3).</p> <p>Ambient PM<sub>2.5</sub> samples were collected using a Harvard Impactor and extracted in methanol. Filtered methanol extracts were evaporated using an evaporator set, and reconstituted with DI. OP<sup>DTT</sup> of water-reconstituted methanol-soluble extracts was assessed in the same manner as Hu et al. (2008). See section 2 (experimental methods).</p> |
| Yang et al. (2014)* | $\leq 2.5$ | 0.5 – 5.2 nmol·min <sup>-1</sup> ·m <sup>-3</sup>                                                                                                                                                                                  | Rotterdam and<br>Amsterdam,<br>Netherland | Urban                      | 20  |                                                                                                                                                                                                                                                                                                                                                                                                                                                                                                                                                                                                                                                    |
| This study          | $\leq 2.5$ | 0.004 – 0.032 nmol·min <sup>-1</sup> ·μg <sup>-1</sup><br>median: 0.014 nmol·min <sup>-1</sup> ·μg <sup>-1</sup><br>0.029 – 0.561 nmol·min <sup>-1</sup> ·m <sup>-3</sup><br>median: 0.150 nmol·min <sup>-1</sup> ·m <sup>-3</sup> | Midwest US (5<br>sites)                   | Urban<br>(4), rural<br>(1) | 241 |                                                                                                                                                                                                                                                                                                                                                                                                                                                                                                                                                                                                                                                    |
| This study*         | $\leq 2.5$ | 0.004 – 0.042 nmol·min <sup>-1</sup> ·μg <sup>-1</sup><br>median: 0.021 nmol·min <sup>-1</sup> ·μg <sup>-1</sup><br>0.031 – 0.639 nmol·min <sup>-1</sup> ·m <sup>-3</sup><br>median: 0.234 nmol·min <sup>-1</sup> ·m <sup>-3</sup> | Midwest US (5<br>sites)                   | Urban<br>(4), rural<br>(1) | 241 |                                                                                                                                                                                                                                                                                                                                                                                                                                                                                                                                                                                                                                                    |

---

Asterisk - \* indicates that the reported results are methanol-soluble OP<sup>DTT</sup>.



(e)  $OP^{OH-DTT}$ 

| Reference           | PM size<br>( $\mu\text{m}$ ) | Levels                                                                                                                                                                                                                                                                                                     | Location             | Location<br>type     | Sample size | Methodology                                                                                                                                                                                                                                                        |
|---------------------|------------------------------|------------------------------------------------------------------------------------------------------------------------------------------------------------------------------------------------------------------------------------------------------------------------------------------------------------|----------------------|----------------------|-------------|--------------------------------------------------------------------------------------------------------------------------------------------------------------------------------------------------------------------------------------------------------------------|
| Xiong et al. (2017) | $\leq 2.5$                   | $0.2 - 0.6 \text{ pmol} \cdot \text{min}^{-1} \cdot \text{m}^{-3}$                                                                                                                                                                                                                                         | Urbana, IL           | Urban                | 10          | $PM_{2.5}$ extracts were incubated in 100 $\mu\text{M}$ DTT and K-PB (pH = 7.4) with 50 mM TPT. $\cdot\text{OH}$ was captured by TPT and measured based on a fluorometric method (excitation/emission wavelength of 310/425 nm) at six time points within 120 min. |
| Yu et al. (2018)    | $\leq 2.5$                   | $0.2 - 1.1 \text{ pmol} \cdot \text{min}^{-1} \cdot \text{m}^{-3}$                                                                                                                                                                                                                                         | Urbana, IL           | Urban                | 10          | $PM_{2.5}$ sampling, preparation and $OP^{OH-DTT}$ measurement were conducted in the same manner as Xiong et al. (2017).                                                                                                                                           |
| Yu et al. (2020)    | $\leq 2.5$                   | $0.034 - 0.357 \text{ pmol} \cdot \text{min}^{-1} \cdot \mu\text{g}^{-1}$<br>median: $0.082 \text{ pmol} \cdot \text{min}^{-1} \cdot \mu\text{g}^{-1}$<br>$0.360 - 4.152 \text{ pmol} \cdot \text{min}^{-1} \cdot \text{m}^{-3}$<br>median: $1.054 \text{ pmol} \cdot \text{min}^{-1} \cdot \text{m}^{-3}$ | Midwest US (5 sites) | Urban (4), rural (1) | 54          | $PM_{2.5}$ sampling, preparation and $OP^{OH-DTT}$ measurement was conducted in the same manner as the current study.                                                                                                                                              |
| This study          | $\leq 2.5$                   | $0.004 - 0.357 \text{ pmol} \cdot \text{min}^{-1} \cdot \mu\text{g}^{-1}$<br>median: $0.065 \text{ pmol} \cdot \text{min}^{-1} \cdot \mu\text{g}^{-1}$<br>$0.022 - 3.565 \text{ pmol} \cdot \text{min}^{-1} \cdot \text{m}^{-3}$<br>median: $0.722 \text{ pmol} \cdot \text{min}^{-1} \cdot \text{m}^{-3}$ | Midwest US (5 sites) | Urban (4), rural (1) | 241         | See section 2 (experimental methods).                                                                                                                                                                                                                              |

**Table S7.** Seasonal median of the ratio of methanol-soluble OP<sub>v</sub> to water-soluble OP<sub>v</sub> (M/W<sup>OP</sup>) for OP<sup>OH-SLF</sup><sub>v</sub> at five sampling sites.

|             | CHI | STL | IND | CMP | BON |
|-------------|-----|-----|-----|-----|-----|
| Summer 2018 | 2.1 | 2.6 | 2.0 | 1.1 | 2.0 |
| Fall 2018   | 3.5 | 4.9 | 5.5 | 2.7 | 4.6 |
| Winter 2018 | 9.4 | 2.9 | 3.3 | 3.2 | 3.9 |
| Spring 2019 | 3.2 | 2.7 | 7.2 | 4.1 | 3.9 |

## References

- Cesari, D., Merico, E., Grasso, F. M., Decesari, S., Belosi, F., Manarini, F., De Nuntiis, P., Rinaldi, M., Volpi, F., and Gambaro, A.: Source apportionment of PM<sub>2.5</sub> and of its oxidative potential in an industrial suburban site in South Italy, *Atmosphere*, 10, 758, 2019.
- Charrier, J., and Anastasio, C.: On dithiothreitol (DTT) as a measure of oxidative potential for ambient particles: evidence for the importance of soluble transition metals, *Atmospheric Chemistry and Physics*, 12, 11317-11350, 10.5194/acp-12-9321-2012, 2012.
- Cho, A. K., Sioutas, C., Miguel, A. H., Kumagai, Y., Schmitz, D. A., Singh, M., Eiguren-Fernandez, A., and Froines, J. R.: Redox activity of airborne particulate matter at different sites in the Los Angeles Basin, *Environmental Research*, 99, 40-47, 10.1016/j.envres.2005.01.003, 2005.
- Fang, T., Verma, V., Guo, H., King, L. E., Edgerton, E. S., and Weber, R. J.: A semi-automated system for quantifying the oxidative potential of ambient particles in aqueous extracts using the dithiothreitol (DTT) assay: results from the Southeastern Center for Air Pollution and Epidemiology (SCAPE), *Atmospheric Measurement Techniques*, 8, 471-482, 10.5194/amt-8-471-2015, 2015.
- Fang, T., Verma, V., Bates, J. T., Abrams, J., Klein, M., Strickland, M. J., Sarnat, S. E., Chang, H. H., Mulholland, J. A., and Tolbert, P. E.: Oxidative potential of ambient water-soluble PM<sub>2.5</sub> in the southeastern United States: contrasts in sources and health associations between ascorbic acid (AA) and dithiothreitol (DTT) assays, *Atmospheric Chemistry and Physics*, 16, 3865-3879, 10.5194/acp-16-3865-2016, 2016.
- Gao, D., Fang, T., Verma, V., Zeng, L., and Weber, R. J.: A method for measuring total aerosol oxidative potential (OP) with the dithiothreitol (DTT) assay and comparisons between an urban and roadside site of water-soluble and total OP, *Atmospheric Measurement Techniques*, 10, 2821, 2017.
- Gao, D., Godri Pollitt, K. J., Mulholland, J. A., Russell, A. G., and Weber, R. J.: Characterization and comparison of PM<sub>2.5</sub> oxidative potential assessed by two acellular assays, *Atmospheric Chemistry and Physics*, 20, 5197-5210, 2020a.
- Gao, D., Mulholland, J. A., Russell, A. G., and Weber, R. J.: Characterization of water-insoluble oxidative potential of PM<sub>2.5</sub> using the dithiothreitol assay, *Atmospheric Environment*, 224, 117327, <https://doi.org/10.1016/j.atmosenv.2020.117327>, 2020b.
- Godri, K. J., Harrison, R. M., Evans, T., Baker, T., Dunster, C., Mudway, I. S., and Kelly, F. J.: Increased oxidative burden associated with traffic component of ambient particulate matter at roadside and urban background schools sites in London, *PloS One*, 6, e21961, 10.1371/journal.pone.0021961, 2011.
- Hu, S., Polidori, A., Arhami, M., Shafer, M., Schauer, J., Cho, A., and Sioutas, C.: Redox activity and chemical speciation of size fractionated PM in the communities of the Los Angeles-Long Beach harbor, *Atmospheric Chemistry and Physics*, 8, 6439-6451, 10.5194/acp-8-6439-2008, 2008.
- Künzli, N., Mudway, I. S., Götschi, T., Shi, T., Kelly, F. J., Cook, S., Burney, P., Forsberg, B., Gauderman, J. W., and Hazenkamp, M. E.: Comparison of oxidative properties, light absorbance, and total and elemental mass concentration of ambient PM<sub>2.5</sub> collected at 20 European sites, *Environmental Health Perspectives*, 114, 684-690, 10.1289/ehp.8584, 2006.
- Ma, S., Ren, K., Liu, X., Chen, L., Li, M., Li, X., Yang, J., Huang, B., Zheng, M., and Xu, Z.: Production of hydroxyl radicals from Fe-containing fine particles in Guangzhou, China, *Atmospheric Environment*, 123, 72-78, 10.1016/j.atmosenv.2015.10.057, 2015.
- Mudway, I. S., Duggan, S. T., Venkataraman, C., Habib, G., Kelly, F. J., and Grigg, J.: Combustion of dried animal dung as biofuel results in the generation of highly redox active fine particulates, *Particle and Fibre Toxicology*, 2, 6, 10.1186/1743-8977-2-6, 2005.

Paraskevopoulou, D., Bougiatioti, A., Stavroulas, I., Fang, T., Lianou, M., Liakakou, E., Gerasopoulos, E., Weber, R., Nenes, A., and Mihalopoulos, N.: Yearlong variability of oxidative potential of particulate matter in an urban Mediterranean environment, *Atmospheric Environment*, 206, 183-196, 2019.

Perrone, M. R., Bertoli, I., Romano, S., Russo, M., Rispoli, G., and Pietrogrande, M. C.: PM<sub>2.5</sub> and PM<sub>10</sub> oxidative potential at a Central Mediterranean Site: Contrasts between dithiothreitol-and ascorbic acid-measured values in relation with particle size and chemical composition, *Atmospheric Environment*, 210, 143-155, 2019.

Szigeti, T., Dunster, C., Cattaneo, A., Cavallo, D., Spinazzè, A., Saraga, D. E., Sakellaris, I. A., de Kluizenaar, Y., Cornelissen, E. J., and Hänninen, O.: Oxidative potential and chemical composition of PM<sub>2.5</sub> in office buildings across Europe–The OFFICAIR study, *Environment International*, 92, 324-333, 10.1016/j.envint.2016.04.015, 2016.

Verma, V., Rico-Martinez, R., Kotra, N., King, L., Liu, J., Snell, T. W., and Weber, R. J.: Contribution of water-soluble and insoluble components and their hydrophobic/hydrophilic subfractions to the reactive oxygen species-generating potential of fine ambient aerosols, *Environmental Science & Technology*, 46, 11384-11392, 10.1021/es302484r, 2012.

Vidrio, E., Phuah, C. H., Dillner, A. M., and Anastasio, C.: Generation of hydroxyl radicals from ambient fine particles in a surrogate lung fluid solution, *Environmental Science & Technology*, 43, 922-927, 10.1021/es801653u, 2009.

Xiong, Q., Yu, H., Wang, R., Wei, J., and Verma, V.: Rethinking the dithiothreitol-based particulate matter oxidative potential: measuring dithiothreitol consumption versus reactive oxygen species generation, *Environmental Science & Technology*, 51, 6507-6514, 10.1021/acs.est.7b01272, 2017.

Yang, A., Jedynska, A., Hellack, B., Kooter, I., Hoek, G., Brunekreef, B., Kuhlbusch, T. A., Cassee, F. R., and Janssen, N. A.: Measurement of the oxidative potential of PM<sub>2.5</sub> and its constituents: The effect of extraction solvent and filter type, *Atmospheric Environment*, 83, 35-42, 10.1016/j.atmosenv.2013.10.049, 2014.

Yu, H., Puthussery, J. V., and Verma, V.: A semi-automated multi-endpoint reactive oxygen species activity analyzer (SAMERA) for measuring the oxidative potential of ambient PM<sub>2.5</sub> aqueous extracts, *Aerosol Science and Technology*, 54, 304-320, 2020.
